# Supplementary material for: Central role for RNase YbeY in Hfq-dependent and Hfq-independent small-RNA regulation in bacteria
Source: PubMed Central journal article supplement (PMC3933206; doi:10.1186/1471-2164-15-121), 2014-02-11
Supplement: 1471-2164-15-121-S4.pdf [file 1471-2164-15-121-S4.pdf]

**Supplemental Table 4. Functional clusters of genes differentially up-regulated in *ΔybeY* vs. WT under unstressed state**

| Enrichment Score:    |                                           |                                                                                                                                                                                                                                                                                                                                                                                                                                                                                                                                                                                                                                                                                                                                                                                                                                                                                                                                                                                                                                                                                                                                                                                                                                                                                                                   |
|----------------------|-------------------------------------------|-------------------------------------------------------------------------------------------------------------------------------------------------------------------------------------------------------------------------------------------------------------------------------------------------------------------------------------------------------------------------------------------------------------------------------------------------------------------------------------------------------------------------------------------------------------------------------------------------------------------------------------------------------------------------------------------------------------------------------------------------------------------------------------------------------------------------------------------------------------------------------------------------------------------------------------------------------------------------------------------------------------------------------------------------------------------------------------------------------------------------------------------------------------------------------------------------------------------------------------------------------------------------------------------------------------------|
| Annotation Cluster   | Score                                     |                                                                                                                                                                                                                                                                                                                                                                                                                                                                                                                                                                                                                                                                                                                                                                                                                                                                                                                                                                                                                                                                                                                                                                                                                                                                                                                   |
| Annotation Cluster 1 | 36.31768336124915                         |                                                                                                                                                                                                                                                                                                                                                                                                                                                                                                                                                                                                                                                                                                                                                                                                                                                                                                                                                                                                                                                                                                                                                                                                                                                                                                                   |
| Category             | Term                                      | Genes                                                                                                                                                                                                                                                                                                                                                                                                                                                                                                                                                                                                                                                                                                                                                                                                                                                                                                                                                                                                                                                                                                                                                                                                                                                                                                             |
|                      |                                           | YDJZ, YDJX, FSR, TRKG, YDJM, YNAI, EAMA, YNAJ, YBBM, PHOQ, ABRB, YIAV, YDJE, YOAE, ACRE, YBBY, GNTP, BCR, AQPZ, YICL, CAIT, ATPI, RHTA, YBCI, PLDA, HTRE, RFBX, YMBA, GFCE, GFCD, SFMD, YCHE, YCHM, YCIS, YAAH, SAPF, YCIB, YCIC, SAPD, SAPC, YOBD, ANSP, YCFZ, FRDD, MSBA, YAFT, MDTC, SSUB, MDTA, MDTB, YBFP, MDTH, YBFN, MDTK, MDTI, MDTJ, YMFA, CLD, TYRP, TORY, GFCA, YDGC, LOLB, MODC, YBGQ, TEHA, LOLE, YEHW, YDGK, RBBA, YIJP, YDHP, APBE, DJLA, YNJC, YDHU, FTSX, LPXM, YDHC, SBMA, YNJV, AAEB, UIDC, NFRB, YNJI, NFRA, YDHK, YDHJ, YBHT, YIDC, YQFA, YBIO, MLTF, YEJB, YEJM, EXUT, CMTA, SDHC, BAES, MLTD, POTB, YBIP, POTA, YHDU, YBIR, POTC, YFIN, PITA, YEER, MRCB, MRCA, SPR, YCBS, YEDV, HOFB, YEDQ, YAJR, RFC, WBBK, YNIB, YBJE, HOFQ, YEDE, MRDA, MRDB, YEDA, YBJO, RSXC, PGSA, YDCO, YCCS, YAJI, MDOC, YDDG, YLIF, FDRA, YNFA, KDPD, TATB, COBS, YNFE, YNFF, WAAU, YNFH, YDDW, YEGH, UHPB, UHPC, MDOH, WAAA, YJIK, SETA, CMR, YDEE, TORC, TAUC, EMRD, TAUB, TAUD, YCAD, YCAI, PHEP, YCAM, OMPW, LEUE, FLU, CCMG, YTFT, CCMH, CCMF, YEAJ, YKGB, DCUB, YEAN, PRC, TQSA, PGPB, ETK, YNEF, YFDV, MDLA, MDLB, YNEN, YNEM, SPPA, TOLA, AMID, TOLR, YNBB, YECN, RTN, PGAA, PGAD, YFCA, SDAC, FADK, DMSD, YFBV, DMSC, MENA, YEBO, YBAL, YEBT, YEBS, YGJV, ZNUB, ZNUC, YEAV, YEAY, HFLD, GPT, KEFA, YHJV |
| SP_PIR_KEYWORDS      | membrane                                  |                                                                                                                                                                                                                                                                                                                                                                                                                                                                                                                                                                                                                                                                                                                                                                                                                                                                                                                                                                                                                                                                                                                                                                                                                                                                                                                   |
| Enrichment Score:    |                                           |                                                                                                                                                                                                                                                                                                                                                                                                                                                                                                                                                                                                                                                                                                                                                                                                                                                                                                                                                                                                                                                                                                                                                                                                                                                                                                                   |
| Annotation Cluster 2 | 10.89394787982058                         |                                                                                                                                                                                                                                                                                                                                                                                                                                                                                                                                                                                                                                                                                                                                                                                                                                                                                                                                                                                                                                                                                                                                                                                                                                                                                                                   |
| Category             | Term                                      | Genes                                                                                                                                                                                                                                                                                                                                                                                                                                                                                                                                                                                                                                                                                                                                                                                                                                                                                                                                                                                                                                                                                                                                                                                                                                                                                                             |
| KEGG_PATHWAY         | ecr02020:Two-component system             | TORA, NARP, FRDD, DCUB, CITD, TORC, KDPD, CITG, SDIA, MDTC, UHPB, UHPA, MDTA, BAES, AMPC, UHPC, MDTB, PHOQ, CITX, PHOP, FLHC, FLHD                                                                                                                                                                                                                                                                                                                                                                                                                                                                                                                                                                                                                                                                                                                                                                                                                                                                                                                                                                                                                                                                                                                                                                                |
| Enrichment Score:    |                                           |                                                                                                                                                                                                                                                                                                                                                                                                                                                                                                                                                                                                                                                                                                                                                                                                                                                                                                                                                                                                                                                                                                                                                                                                                                                                                                                   |
| Annotation Cluster 3 | 7.784671846867312                         |                                                                                                                                                                                                                                                                                                                                                                                                                                                                                                                                                                                                                                                                                                                                                                                                                                                                                                                                                                                                                                                                                                                                                                                                                                                                                                                   |
| Category             | Term                                      | Genes                                                                                                                                                                                                                                                                                                                                                                                                                                                                                                                                                                                                                                                                                                                                                                                                                                                                                                                                                                                                                                                                                                                                                                                                                                                                                                             |
| SP_PIR_KEYWORDS      | ATP                                       | DNAA, MSBA, ASPS, ASNS, GYRB, YNJD, REP, SSUB, MFD, FADK, YCBS, TMK, HOFB, UVRD, GLTX, MDLA, BIRA, TYRS, MDLB, RECG, UUP, CAIC, YCEQ, ARGS, SAPF, ZNUC, TDK, SAPD, MODC, PRIA, POTA                                                                                                                                                                                                                                                                                                                                                                                                                                                                                                                                                                                                                                                                                                                                                                                                                                                                                                                                                                                                                                                                                                                               |
| SP_PIR_KEYWORDS      | nucleotide binding                        | DNAA, YNBB, MSBA, COBU, KDPD, YNJD, REP, SSUB, MFD, NFRA, YCHF, YCBS, TMK, HOFB, UVRD, MDLA, MDLB, TAUB, RECG, UUP, YCEQ, SAPF, ZNUC, TDK, SAPD, TOLA, MODC, CITX, PRIA, POTA                                                                                                                                                                                                                                                                                                                                                                                                                                                                                                                                                                                                                                                                                                                                                                                                                                                                                                                                                                                                                                                                                                                                     |
| GOTERM_MF_FAT        | GO:0016887~ATPase activity                | RBBA, MSBA, COBT, COBS, RFBB, YBHA, YNJD, REP, SBMA, YOAA, SSUB, MFD, RECQ, TBPA, YCBZ, UVRD, MDLA, MDLB, TAUB, RECG, LHR, UUP, ZNUB, SAPF, ZNUC, SAPD, MODC, YEHX, MODE, PRIA, POTA                                                                                                                                                                                                                                                                                                                                                                                                                                                                                                                                                                                                                                                                                                                                                                                                                                                                                                                                                                                                                                                                                                                              |
| INTERPRO             | IPR017871:ABC transporter, conserved site | RBBA, MSBA, MDLA, MDLB, TAUB, RFBB, UUP, YNJD, SAPF, ZNUC, SAPD, SSUB, MODC, YEHX, POTA                                                                                                                                                                                                                                                                                                                                                                                                                                                                                                                                                                                                                                                                                                                                                                                                                                                                                                                                                                                                                                                                                                                                                                                                                           |
| UP_SEQ_FEATURE       | domain:ABC transporter                    | SAPF, ZNUC, SAPD, MSBA, SSUB, MDLA, MDLB, TAUB, YEHX, MODC, POTA, YNJD                                                                                                                                                                                                                                                                                                                                                                                                                                                                                                                                                                                                                                                                                                                                                                                                                                                                                                                                                                                                                                                                                                                                                                                                                                            |

|                      |                                             |                                                                                                                                                                                                                                                                                                                                                                                                                                                                                                                                                                                         |
|----------------------|---------------------------------------------|-----------------------------------------------------------------------------------------------------------------------------------------------------------------------------------------------------------------------------------------------------------------------------------------------------------------------------------------------------------------------------------------------------------------------------------------------------------------------------------------------------------------------------------------------------------------------------------------|
| INTERPRO             | IPR003439:ABC<br>transporter-like           | RBBA, MSBA, MDLA, MDLB, TAUB, RFBB, UUP, YNJD, SAPF, ZNUC, SAPD, SSUB, MODC, YEHX, POTA                                                                                                                                                                                                                                                                                                                                                                                                                                                                                                 |
| UP_SEQ_FEATURE       | nucleotide phosphate-<br>binding region:ATP | TTCA, DNAA, MSBA, COBU, YNJD, REP, GSPA, YOAA, SSUB, MFD, PHOQ, RECQ, FADK, TMK, HOFB, UVRD, MNMA, CMK, MDLA, TAUB, MDLB, RECG, LHR, PDXY, PRPR, SAPF, ZNUC, PYRH, TDK, SAPD, ISPE, COAA, MODC, YEHX, PRIA, POTA, UDK, RHO                                                                                                                                                                                                                                                                                                                                                              |
| Annotation Cluster 4 | Enrichment Score:<br>7.166008866141713      |                                                                                                                                                                                                                                                                                                                                                                                                                                                                                                                                                                                         |
| Category             | Term                                        | Genes                                                                                                                                                                                                                                                                                                                                                                                                                                                                                                                                                                                   |
| SP_PIR_KEYWORDS      | transport protein                           | GFCE, CMR, MDLA, MDLB, UUP, ZNUB, SAPF, ZNUC, SSUB, POTB, POTA, YCHM, YCBS, POTD, POTC                                                                                                                                                                                                                                                                                                                                                                                                                                                                                                  |
| KEGG_PATHWAY         | ecd02010:ABC<br>transporters                | YEJB, MSBA, TAUC, MDLB, TAUB, SAPA, ZNUB, FTSX, SAPF, ZNUC, YGIS, SAPD, MPPA, SSUB, SACP, MODC, YEHX, POTB, POTA, LOLE, YEHW, POTD, POTC                                                                                                                                                                                                                                                                                                                                                                                                                                                |
| Annotation Cluster 5 | Enrichment Score:<br>6.380048826103632      |                                                                                                                                                                                                                                                                                                                                                                                                                                                                                                                                                                                         |
| Category             | Term                                        | Genes                                                                                                                                                                                                                                                                                                                                                                                                                                                                                                                                                                                   |
| SP_PIR_KEYWORDS      | nucleotide-binding                          | NARP, ASPs, MSBA, PRS, CITG, PRPE, YEAP, GSPA, YOAA, SSUB, MFD, PHOQ, RECQ, GLXK, YEDV, ETK, YKFA, TMK, TOPA, HOFB, TOPB, UVRD, GLTX, MNMA, THIK, TYRS, BIRA, MDLA, MDLB, RECG, YBCF, UUP, PDXY, ARGS, PYRH, MODC, YEHX, TTCA, RBBA, USHA, DNAA, YADB, KDPD, COBU, NDK, ASNS, GYRB, HSCC, RFBB, YNJD, REP, UHPB, RFAY, YCHF, FADK, POXA, MENE, NADD, CMK, TAUB, YEJH, LHR, PRPR, SAPF, ZNUC, SAPD, ISPE, TDK, BAES, FOLK, COAA, PCNB, PRIA, POTA, YFJP, RHO, UDK                                                                                                                        |
| SP_PIR_KEYWORDS      | atp-binding                                 | NARP, ASPs, MSBA, PRS, CITG, PRPE, GSPA, YOAA, SSUB, MFD, PHOQ, RECQ, GLXK, YEDV, ETK, TMK, TOPA, HOFB, TOPB, UVRD, GLTX, MNMA, THIK, TYRS, BIRA, MDLA, MDLB, RECG, YBCF, UUP, PDXY, ARGS, PYRH, MODC, YEHX, TTCA, RBBA, DNAA, YADB, KDPD, COBU, NDK, ASNS, GYRB, HSCC, RFBB, YNJD, REP, UHPB, RFAY, FADK, POXA, MENE, NADD, CMK, TAUB, YEJH, LHR, PRPR, SAPF, ZNUC, SAPD, ISPE, TDK, BAES, YFAL, FOLK, COAA, PCNB, PRIA, POTA, RHO, UDK                                                                                                                                                |
| GOTERM_MF_FAT        | GO:0005524~ATP<br>binding                   | NARP, ASPs, MSBA, PRS, CITG, PRPE, GSPA, YOAA, SSUB, MFD, PHOQ, RECQ, GLXK, YEDV, ETK, TMK, TOPA, HOFB, TOPB, UVRD, GLTX, MNMA, THIK, TYRS, MDLA, BIRA, MDLB, RECG, QUEC, YBCF, UUP, PDXY, ARGS, PYRH, EUTJ, MODC, YEHX, MODE, TTCA, RBBA, DNAA, YADB, KDPD, COBU, NDK, ASNS, GYRB, HSCC, RFBB, YBHA, YNJD, REP, SBMA, UHPB, NFRB, YEGI, FADK, TBPA, POXA, MENE, NADD, CMK, TAUB, YEJH, LHR, ZNUB, PRPR, SAPF, ZNUC, SAPD, ISPE, TDK, BAES, YFAL, FOLK, COAA, PCNB, INAA, PRIA, POTA, RHO, UDK                                                                                          |
| GOTERM_MF_FAT        | GO:0000166~nucleoti<br>de binding           | ASPS, YOAA, MFD, UGD, PHOQ, RECQ, YEDV, TMK, TOPA, HOFB, TOPB, UVRD, GLTX, MNMA, THIK, QUEC, RECG, YBCF, PDXY, ARGS, EUTJ, RSXC, TTCA, DNAA, COBU, KDPD, GYRB, UHPB, YEGI, YCHF, POXA, CMK, TAUB, LHR, PRPR, SAPF, SAPD, TDK, ISPE, YFAL, FOLK, COAA, PCNB, PRIA, INAA, RHO, UDK, NARP, MSBA, PRS, CITG, PRPE, YEAP, GSPA, HEMA, SSUB, GLXK, NORV, ETK, YKFA, BIRA, MDLA, TYRS, MDLB, UUP, PYRH, YEHX, MODC, MODE, USHA, RBBA, YADB, NDK, ASNS, DUSC, HSCC, RFBB, YBHA, YNJD, REP, SBMA, NFRB, FADK, YDIR, TBPA, MENE, NADD, YEJH, MIOC, ZNUB, FOLA, ZNUC, FIXB, DUSA, BAES, POTA, YFJP |

| Enrichment Score:    |                                                            |                                                                                                                                                                                                                                         |
|----------------------|------------------------------------------------------------|-----------------------------------------------------------------------------------------------------------------------------------------------------------------------------------------------------------------------------------------|
| Annotation Cluster 6 | 5.6184365503727856                                         |                                                                                                                                                                                                                                         |
| Category             | Term                                                       | Genes                                                                                                                                                                                                                                   |
| SP_PIR_KEYWORDS      | lipopolysaccharide biosynthesis                            | RFAG, YIJP, WBBI, WCAC, WBBJ, RFBA, RFBB, CLD, RFC, RFBC, WBBK, RFBD, WAAU, LPXM, RFAY, GLF, WAAA, RFBX, ARND                                                                                                                           |
| GOTERM_MF_FAT        | GO:0042280~cell surface antigen activity, host-interacting | RFAG, RFBA, RFC, CLD, RFBB, WAAU, LPXM, RFAY, UGD, ASMA, GLF, WAAA, RFBX, LPXH                                                                                                                                                          |
| GOTERM_BP_FAT        | GO:0000271~polysaccharide biosynthetic process             | MDOC, MDOG, RFBA, RFBB, RFBC, RFBD, WAAU, HIPA, HIPB, MRCB, LPXM, RFAY, PRC, MRCA, UGD, MDOH, WAAA, LPXH, RFAG, ETK, YEDQ, WCAC, WBBI, WBBJ, ALR, CLD, RFC, WBBK, MRDA, AMPC, ASMA, GLF, AMIC, INAA, RFBX                               |
| GOTERM_BP_FAT        | GO:0016051~carbohydrate biosynthetic process               | MDOC, MDOG, RFBA, RFBB, RFBC, HIPA, WAAU, RFBD, HIPB, MRCB, LPXM, NAGC, RFAY, PRC, MRCA, UGD, MDOH, SDAA, WAAA, LPXH, RFAG, ETK, YEDQ, WCAC, WBBI, WBBJ, ALR, CLD, RFC, WBBK, MRDA, AMPC, ASMA, GLF, AMIC, INAA, RFBX                   |
| GOTERM_BP_FAT        | GO:0005976~polysaccharide metabolic process                | MDOC, MDOG, RFBA, RFBB, RFBC, HIPA, WAAU, RFBD, HIPB, MRCB, LPXM, RFAY, PRC, MRCA, UGD, MDOH, WAAA, LPXH, RFAG, ETK, YIEL, ARRD, YEDQ, WCAC, WBBI, WBBJ, ALR, CLD, RFC, YAGH, WBBK, MRDA, MPPA, AMPC, ASMA, AMID, GLF, AMIC, INAA, RFBX |

| Enrichment Score:    |                          |                                                                                                                                                                                                                                                                                                                                                                                                                                                               |
|----------------------|--------------------------|---------------------------------------------------------------------------------------------------------------------------------------------------------------------------------------------------------------------------------------------------------------------------------------------------------------------------------------------------------------------------------------------------------------------------------------------------------------|
| Annotation Cluster 7 | 5.48186976177847         |                                                                                                                                                                                                                                                                                                                                                                                                                                                               |
| Category             | Term                     | Genes                                                                                                                                                                                                                                                                                                                                                                                                                                                         |
| SP_PIR_KEYWORDS      | dna-binding              | YCJW, FIS, NARP, YFER, CSPH, CHPS, CYNR, QUUQ, YEAT, CSPF, RSSB, ICLR, YEAM, CSPB, YPHH, YOAA, MATA, MFD, SRLR, RECQ, PHOP, XAPR, FLHC, RECT, YDJF, YDFH, FLHD, YEDW, TOPA, TOPB, UVRD, BIRA, RECG, RACR, YDCQ, DICA, GUTM, CHPB, MODE, YDCN, YBJK, PURR, DNAA, YNFL, YAIW, DEOR, ENVY, YBHD, HIPA, HIPB, REP, SDIA, YDHB, KDGR, UHPA, NAGC, ULAR, LEUO, LSRR, INSH, DGOR, YDIP, UIDR, YBAO, RUTR, RPIR, GALS, ABGR, YHJC, PRPR, YFJR, PERR, ILVY, PRIA, QUUD |
| SP_PIR_KEYWORDS      | Transcription            | YCJW, FIS, NARP, YFER, CSPH, CYNR, QUUQ, YEAT, CSPF, RSSB, ICLR, YEAM, CSPB, MATA, MFD, SRLR, PHOP, XAPR, FLHC, YDJF, YDFH, FLHD, YEDW, BIRA, FIME, YDCQ, RACR, DICA, GUTM, MODE, YDCN, YBJK, PURR, YNFL, DEOR, ENVY, YBHD, HIPB, SDIA, YDHB, KDGR, UHPA, NAGC, ULAR, LEUO, LSRR, DGOR, YDIP, UIDR, YBAO, RUTR, RPIR, GALS, YBAK, ABGR, YHJC, PRPR, YFJR, PCNB, PERR, ILVY, QUUD, RHO                                                                         |
| SP_PIR_KEYWORDS      | transcription regulation | YCJW, FIS, NARP, YFER, CSPH, CYNR, QUUQ, YEAT, CSPF, RSSB, ICLR, YEAM, CSPB, MATA, SRLR, PHOP, XAPR, FLHC, YDJF, YDFH, FLHD, YEDW, BIRA, FIME, YDCQ, RACR, DICA, GUTM, MODE, YDCN, YBJK, PURR, YNFL, DEOR, ENVY, YBHD, HIPB, SDIA, YDHB, KDGR, UHPA, NAGC, ULAR, LEUO, LSRR, DGOR, YDIP, UIDR, YBAO, RUTR, RPIR, GALS, YBAK, ABGR, YHJC, PRPR, YFJR, PERR, ILVY, MLTD, QUUD, RHO                                                                              |

|               |                        |                                                                                                                                                                                                                                                                                                                                                                                                                                                                                                                                                                                                             |
|---------------|------------------------|-------------------------------------------------------------------------------------------------------------------------------------------------------------------------------------------------------------------------------------------------------------------------------------------------------------------------------------------------------------------------------------------------------------------------------------------------------------------------------------------------------------------------------------------------------------------------------------------------------------|
| GOTERM_MF_FAT | GO:0003677~DNA binding | YCJW, FIS, CHPS, CYNR, QUUQ, ICLR, INTD, YOAA, YPHH, YCJD, MATA, YNAK, MFD, SRLR, RECQ, PHOP, XAPR, RECT, FLHC, YDJF, FLHD, YEDW, TOPA, TOPB, UVRC, UVRD, RECG, RACR, YDCQ, LIGA, INTR, GUTM, CHPB, INTQ, YDCN, YBJK, PURR, YNFL, DNAA, YAIW, DEOR, GYRB, HIPA, HIPB, KDGR, YBDM, NAGC, UHPA, YEGI, ULAR, DNAN, LEUO, LSRR, INSH, DGOR, YCIV, RUTR, VSR, GALS, PRPR, PRIA, QUUD, ALKA, NARP, YFER, CSPH, XTTH, YEAT, CSPF, RSSB, YEAM, CSPB, HOLB, HOLA, YDFH, BIRA, FIME, DICA, YIIE, MODE, DCM, ENVY, YBHD, REP, SDIA, YDHB, YBAV, UIDR, YDIP, YNCI, YBAO, RPIR, YEJH, HOLE, ABGR, YHJC, YFJR, PERR, ILVY |
|---------------|------------------------|-------------------------------------------------------------------------------------------------------------------------------------------------------------------------------------------------------------------------------------------------------------------------------------------------------------------------------------------------------------------------------------------------------------------------------------------------------------------------------------------------------------------------------------------------------------------------------------------------------------|

| Annotation Cluster 8 | Enrichment Score: 4.2100439367030935            |                                                                                                         |
|----------------------|-------------------------------------------------|---------------------------------------------------------------------------------------------------------|
| Category             | Term                                            | Genes                                                                                                   |
| KEGG_PATHWAY         | ecc00240:Pyrimidine metabolism                  | TMK, USHA, PYRF, PYRH, TDK, HOLB, HOLA, CMK, NDK, HOLE, DNAN, UDK                                       |
| KEGG_PATHWAY         | eck03430:Mismatch repair                        | UVRD, HOLB, HOLA, LIGA, HOLE, EXOX, DNAN                                                                |
| GOTERM_BP_FAT        | GO:0006261~DNA-dependent DNA replication        | TOPA, DNAA, TOPB, UVRD, GYRB, MIOC, HOLE, LHR, RECG, REP, HOLB, HOLA, RECQ, PRIA, DNAN                  |
| KEGG_PATHWAY         | ecd03440:Homologous recombination               | HOLB, HOLA, RUVC, RECG, HOLE, PRIA, DNAN                                                                |
| KEGG_PATHWAY         | ecc03440:Homologous recombination               | HOLB, HOLA, RUVC, RECG, HOLE, PRIA, DNAN                                                                |
| KEGG_PATHWAY         | eum00230:Purine metabolism                      | USHA, HOLB, HOLA, NDK, GPT, HOLE, YBCF, PURB, ALLD, DNAN                                                |
| SP_PIR_KEYWORDS      | dna replication                                 | REP, TOPA, DNAA, UVRD, HOLB, HOLA, LIGA, HOLE, PRIA, DNAN                                               |
| GOTERM_BP_FAT        | GO:0006260~DNA replication                      | TOPA, DNAA, TOPB, UVRD, YCIV, GYRB, RECG, LHR, HOLE, MIOC, REP, TDK, HOLB, HOLA, LIGA, RECQ, PRIA, DNAN |
| GOTERM_MF_FAT        | GO:0016779~nucleotidyltransferase activity      | NADD, YNBB, YCIV, COBU, RFBA, HOLE, REP, HOLB, HOLA, PCNB, CITX, FLHC, DNAN                             |
| GOTERM_MF_FAT        | GO:0003887~DNA-directed DNA polymerase activity | REP, YCIV, HOLB, HOLA, HOLE, DNAN                                                                       |
| GOTERM_MF_FAT        | GO:0034061~DNA polymerase activity              | REP, YCIV, HOLB, HOLA, HOLE, DNAN                                                                       |
| KEGG_PATHWAY         | ecl00230:Purine metabolism                      | USHA, HOLA, NDK                                                                                         |
| KEGG_PATHWAY         | ecy00230:Purine metabolism                      | USHA, HOLA, NDK                                                                                         |
| KEGG_PATHWAY         | ecp00230:Purine metabolism                      | USHA, HOLA, NDK                                                                                         |

---

|              |                            |                 |
|--------------|----------------------------|-----------------|
| KEGG_PATHWAY | ecs00230:Purine metabolism | USHA, HOLA, NDK |
|--------------|----------------------------|-----------------|

---

|                      |                                     |  |
|----------------------|-------------------------------------|--|
| Annotation Cluster 9 | Enrichment Score: 4.165570140627555 |  |
|----------------------|-------------------------------------|--|

---

| Category | Term | Genes |
|----------|------|-------|
|----------|------|-------|

---

|               |                             |                                                                                                  |
|---------------|-----------------------------|--------------------------------------------------------------------------------------------------|
| GOTERM_BP_FAT | GO:0042493~response to drug | CMR, BCR, FSR, EMRD, YAJR, MDLA, AMPH, MRCB, HEMA, SBMA, MRDA, YBBM, PRC, AMPC, MRCA, MDTK, TEHA |
|---------------|-----------------------------|--------------------------------------------------------------------------------------------------|

---

|                 |                       |                                                                            |
|-----------------|-----------------------|----------------------------------------------------------------------------|
| SP_PIR_KEYWORDS | antibiotic resistance | BCR, FSR, GYRB, MRCB, FOLA, RLMN, MRDA, AMPC, MRCA, MDTH, TEHA, MDTK, ARND |
|-----------------|-----------------------|----------------------------------------------------------------------------|

---

|               |                                   |                                                                      |
|---------------|-----------------------------------|----------------------------------------------------------------------|
| GOTERM_BP_FAT | GO:0046677~response to antibiotic | MRCB, FOLA, RLMN, BCR, MRDA, FSR, AMPC, MRCA, MDTH, GYRB, MDTK, TEHA |
|---------------|-----------------------------------|----------------------------------------------------------------------|

---

|                       |                                      |  |
|-----------------------|--------------------------------------|--|
| Annotation Cluster 10 | Enrichment Score: 3.9608078012294987 |  |
|-----------------------|--------------------------------------|--|

---

| Category | Term | Genes |
|----------|------|-------|
|----------|------|-------|

---

|               |                                           |                                             |
|---------------|-------------------------------------------|---------------------------------------------|
| GOTERM_BP_FAT | GO:0009243~O antigen biosynthetic process | GLF, RFBA, RFBX, RFBB, CLD, RFC, RFBC, RFBD |
|---------------|-------------------------------------------|---------------------------------------------|

---

|              |                                             |                        |
|--------------|---------------------------------------------|------------------------|
| KEGG_PATHWAY | ecd00523:Polyketide sugar unit biosynthesis | RFBA, RFBB, RFBC, RFBD |
|--------------|---------------------------------------------|------------------------|

---

|               |                                                  |                              |
|---------------|--------------------------------------------------|------------------------------|
| GOTERM_BP_FAT | GO:0009226~nucleotide-sugar biosynthetic process | USHA, RFBA, RFBB, RFBC, RFBD |
|---------------|--------------------------------------------------|------------------------------|

---

|              |                                    |                        |
|--------------|------------------------------------|------------------------|
| KEGG_PATHWAY | eci00521:Streptomycin biosynthesis | RFBA, RFBB, RFBC, RFBD |
|--------------|------------------------------------|------------------------|

---

|                       |                                     |  |
|-----------------------|-------------------------------------|--|
| Annotation Cluster 11 | Enrichment Score: 3.806171257151025 |  |
|-----------------------|-------------------------------------|--|

---

| Category | Term | Genes |
|----------|------|-------|
|----------|------|-------|

---

|                 |                   |                                                                  |
|-----------------|-------------------|------------------------------------------------------------------|
| SP_PIR_KEYWORDS | protein transport | TOLR, HOFB, SAPF, SAPD, MPPA, HOFB, TOLA, SAPC, LOLB, TATB, SAPA |
|-----------------|-------------------|------------------------------------------------------------------|

---

|                       |                                      |  |
|-----------------------|--------------------------------------|--|
| Annotation Cluster 12 | Enrichment Score: 3.6202838797604127 |  |
|-----------------------|--------------------------------------|--|

---

| Category | Term | Genes |
|----------|------|-------|
|----------|------|-------|

---

|               |                                                                                     |                                                                                                                              |
|---------------|-------------------------------------------------------------------------------------|------------------------------------------------------------------------------------------------------------------------------|
| GOTERM_BP_FAT | GO:0034654~nucleobase, nucleoside, nucleotide and nucleic acid biosynthetic process | TMK, PURR, FEAB, NADD, PRS, NDK, ATP1, COBT, RFBB, QUEC, YBHA, YBCF, PURB, QUEA, FOLA, PYRF, PYRH, GPT, PNCA, RHO, UDK, PNCA |
|---------------|-------------------------------------------------------------------------------------|------------------------------------------------------------------------------------------------------------------------------|

---

|               |                                                   |                                                                                                                                                                                                                                                                                               |
|---------------|---------------------------------------------------|-----------------------------------------------------------------------------------------------------------------------------------------------------------------------------------------------------------------------------------------------------------------------------------------------|
|               |                                                   | PRS, HEMA, HEMB, PNCB, PNCA, TMK, PABC, BIRA, ATPI, PABB, ALR, QUEC, YBCF, TYRP, QUEA, PURB, AROM, PYRF, PYRH, MODC, MODE, PURR, APBE, COBU, COBT, NDK, COBS, RFBB, YBHA, LTAE, SPED, SDAC, NUDB, LEUO, NADD, IVBL, FEAB, FOLA, PHEP, FOLK, GPT, ILVY, POTB, POTA, POTD, POTC, UDK, RHO, ANSP |
| GOTERM_BP_FAT | GO:0044271~nitrogen compound biosynthetic process |                                                                                                                                                                                                                                                                                               |

Enrichment Score:  
Annotation Cluster 13 3.5028568868894014

| Category        | Term                                         | Genes                                    |
|-----------------|----------------------------------------------|------------------------------------------|
| KEGG_PATHWAY    | ecd00860:Porphyrimetabolism                  | HEMA, HEMB, GLTX, UIDA, COBU, COBT, COBS |
| SP_PIR_KEYWORDS | cobalamin biosynthesis                       | COBU, COBT, COBS                         |
| GOTERM_BP_FAT   | GO:0006779~porphyrin biosynthetic process    | HEMA, HEMB, COBU, COBT, COBS             |
| GOTERM_BP_FAT   | GO:0033014~tetrapyrrole biosynthetic process | HEMA, HEMB, COBU, COBT, COBS             |

Enrichment Score:  
Annotation Cluster 14 3.2826706153228047

| Category        | Term                      | Genes                                                                                                                                                                                                                                                                                                                                                                                                                                                 |
|-----------------|---------------------------|-------------------------------------------------------------------------------------------------------------------------------------------------------------------------------------------------------------------------------------------------------------------------------------------------------------------------------------------------------------------------------------------------------------------------------------------------------|
| SP_PIR_KEYWORDS | metal-binding             | PRS, PPHA, XTHA, FUMB, YCJG, MSRB, HEMB, RLMN, PHOQ, YGIQ, YDBK, NORV, TOPA, YFHL, GLTX, PDXY, TORY, HYFA, PLDA, LIGA, AMID, RSXC, RUMB, USHA, YADB, YLII, EFEB, NDK, YDHY, YBDH, RFBA, HYPF, YNFE, YBHA, YNFF, YDHX, YNFG, NUDL, SDAA, RUV, YCHF, YJIL, NUDB, DMSB, MENC, TORC, VSR, TAUD, SDHC, YDEP, GPT, ALKB, PRIA, CCMH, YCIM                                                                                                                   |
| SP_PIR_KEYWORDS | metalloprotein            | TORY, HYFA, YIAY, TORC, PPHA, YNFE, YNFF, YDBK, FUMB, YNFG, DMSB                                                                                                                                                                                                                                                                                                                                                                                      |
| SP_PIR_KEYWORDS | iron                      | EFEB, PPHA, YDHY, YNFE, YDHX, FUMB, YNFF, YNFG, RLMN, MHPB, YIAY, SDAA, YGIQ, YJIL, YDBK, NORV, DMSB, YFHL, TORC, TAUD, TORY, HYFA, SDHC, YDEP, RSXC, ALKB, CCMH, RUMB                                                                                                                                                                                                                                                                                |
| GOTERM_MF_FAT   | GO:0043169~cation binding | PRS, XTHA, PPHA, FUMB, EXOX, TRKG, MSRB, HEMB, RLMN, MHPB, YIAY, PHOQ, YGIQ, MDTK, YDBK, NORV, TOPA, YFHL, GLTX, PDXY, TORZ, TORY, HYFA, PLDA, LIGA, ASCB, AMID, MODC, RSXC, MODE, RUMB, USHA, YADB, YLII, EFEB, NDK, YDHY, YBDH, RFBA, HYPF, YNFE, TATD, YBHA, YNFF, YDHX, YNFG, NUDG, YDDW, NUDJ, SPED, UIDA, NUDL, YCHF, SDAA, RUV, YJIL, NUDB, DMSB, TORA, MENC, TORC, YHJJ, VSR, TAUD, ZNUB, ZNUC, SDHC, YDEP, GPT, KEFA, ALKB, PRIA, CCMH, YCIM |

Enrichment Score:  
Annotation Cluster 15 3.0335992067431476

| Category | Term | Genes |
|----------|------|-------|
|----------|------|-------|

|              |                                     |                       |
|--------------|-------------------------------------|-----------------------|
| KEGG_PATHWAY | ecd03420:Nucleotide excision repair | UVRC, UVRD, MFD, LIGA |
|--------------|-------------------------------------|-----------------------|

| Enrichment Score:     |                                    |                                                                                                                                                                                 |
|-----------------------|------------------------------------|---------------------------------------------------------------------------------------------------------------------------------------------------------------------------------|
| Annotation Cluster 16 | 2.8200660875272687                 |                                                                                                                                                                                 |
| Category              | Term                               | Genes                                                                                                                                                                           |
| GOTERM_BP_FAT         | GO:0034660~ncRNA metabolic process | TTCA, YADB, ASPS, ASNS, DUSC, RLML, RLMN, TRMA, PTH, CMOA, CMOB, GIDB, YBEA, POXA, RSMF, GLTX, MNMA, RNT, TYRS, QUEC, QUEA, ARGS, YEDF, RLUE, RLUC, DUSA, RLUB, YCCW, RND, RUMB |
| SP_PIR_KEYWORDS       | s-adenosyl-l-methionine            | YBEA, RSMF, CFA, DCM, RLML, RLMN, TRMA, SPED, YCCW, YGIQ, CMOA, CMOB, GIDB, RUMB                                                                                                |
| GOTERM_BP_FAT         | GO:0034470~ncRNA processing        | TTCA, YBEA, RSMF, MNMA, RNT, DUSC, QUEC, QUEA, RLML, YEDF, RLMN, RLUE, TRMA, RLUC, DUSA, YCCW, RLUB, RND, CMOA, CMOB, GIDB, RUMB                                                |
| SP_PIR_KEYWORDS       | rrna processing                    | RLML, YBEA, RLMN, RLUE, RSMF, RLUC, RLUB, YCCW, GIDB, RUMB                                                                                                                      |
| SP_PIR_KEYWORDS       | methyltransferase                  | YBEA, CFA, RSMF, PRMC, RRMA, YNBC, MNMA, DCM, RLML, YAFS, RLMN, TRMA, YCCW, ALKB, CMOA, CMOB, GIDB, RUMB, YBCY                                                                  |
| GOTERM_BP_FAT         | GO:0006399~tRNA metabolic process  | TTCA, POXA, YADB, ASPS, GLTX, MNMA, RNT, TYRS, ASNS, DUSC, QUEC, QUEA, YEDF, ARGS, TRMA, DUSA, PTH, RND, CMOA, CMOB                                                             |
| GOTERM_BP_FAT         | GO:0009451~RNA modification        | YBEA, RSMF, MNMA, QUEC, QUEA, RLML, RLUE, TRMA, RLUC, PCNB, YCCW, RLUB, RND, CMOA, CMOB, RUMB                                                                                   |
| GOTERM_BP_FAT         | GO:0006396~RNA processing          | TTCA, YBEA, RSMF, MNMA, RNT, DUSC, QUEC, QUEA, RLML, YEDF, RLMN, RLUE, TRMA, RLUC, DUSA, PCNB, YCCW, RLUB, RND, CMOA, CMOB, GIDB, RUMB                                          |
| GOTERM_BP_FAT         | GO:0042254~ribosome biogenesis     | RLML, YBEA, RLMN, RLUE, RSMF, RLUC, RLUB, YCCW, RPLT, GIDB, RUMB                                                                                                                |
| GOTERM_BP_FAT         | GO:0006364~rRNA processing         | RLML, YBEA, RLMN, RLUE, RSMF, RLUC, RLUB, YCCW, GIDB, RUMB                                                                                                                      |
| GOTERM_BP_FAT         | GO:0032259~methylation             | RLML, YBEA, RSMF, PRMC, YCCW, DCM                                                                                                                                               |

| Enrichment Score:     |                                  |                                                                                                                                                                                                                                                                      |
|-----------------------|----------------------------------|----------------------------------------------------------------------------------------------------------------------------------------------------------------------------------------------------------------------------------------------------------------------|
| Annotation Cluster 17 | 2.8113707173110707               |                                                                                                                                                                                                                                                                      |
| Category              | Term                             | Genes                                                                                                                                                                                                                                                                |
| SP_PIR_KEYWORDS       | dna repair                       | UVRC, UVRD, VSR, XTHA, RECG, EXOX, REP, LIGA, MFD, RECQ, CHO, RUVVC, ALKB, ALKA                                                                                                                                                                                      |
| GOTERM_BP_FAT         | GO:0006259~DNA metabolic process | FIS, DNAA, YEES, XTHA, DCM, GYRB, INTD, HIPA, EXOX, HIPB, REP, HOLB, HOLA, YEGI, MFD, RECQ, RUVVC, CHO, RECT, NUDB, DNAN, YBAV, TOPA, TOPB, INSH, UVRC, UVRD, YCIV, YNCI, RNT, VSR, RECG, HOLE, LHR, MIOC, RECE, FIME, TDK, LIGA, INTR, INTQ, PRIA, ALKB, YKFG, ALKA |

| Enrichment Score:     |                   |       |
|-----------------------|-------------------|-------|
| Annotation Cluster 18 | 2.778067085799674 |       |
| Category              | Term              | Genes |

|                 |             |                                                                                                                             |
|-----------------|-------------|-----------------------------------------------------------------------------------------------------------------------------|
| SP_PIR_KEYWORDS | palmitate   | GFCE, GFCD, APBE, YAFT, YDDW, YEAY, MGRB, LOLB, YBFP, AMID, SPR, MLTD, YMBA, YAJI, ACRE                                     |
| SP_PIR_KEYWORDS | lipoprotein | GFCE, GFCD, YDHO, YAIW, APBE, YADE, YAFT, YDDW, YEAY, MGRB, AMID, YBFP, LOLB, YBFN, SPR, MLTD, LOLE, YMBA, YDEK, YAJI, ACRE |

|                       |                                      |                                                                                                                                    |
|-----------------------|--------------------------------------|------------------------------------------------------------------------------------------------------------------------------------|
| Enrichment Score:     |                                      |                                                                                                                                    |
| Annotation Cluster 19 | 2.775021995371978                    |                                                                                                                                    |
| Category              | Term                                 | Genes                                                                                                                              |
| GOTERM_BP_FAT         | GO:0006766~vitamin metabolic process | CAIB, MENC, MENE, NADD, FEAB, MENA, COBU, APBE, BIRA, PABC, COBT, COBS, PABB, RFBB, PDXY, FOLA, FIXB, FOLK, FIXA, NUDB, PNCB, PNCA |

|                       |                                                   |                                                                        |
|-----------------------|---------------------------------------------------|------------------------------------------------------------------------|
| Enrichment Score:     |                                                   |                                                                        |
| Annotation Cluster 20 | 2.5702190815566985                                |                                                                        |
| Category              | Term                                              | Genes                                                                  |
| SP_PIR_KEYWORDS       | folate biosynthesis                               | FOLA, FOLK, PABC, PABB, NUDB                                           |
| GOTERM_BP_FAT         | GO:0019438~aromatic compound biosynthetic process | AROM, FOLA, PHEP, SPED, FOLK, PABC, APBE, MODC, PABB, MODE, TYRP, NUDB |

|                       |                  |                                                                                                                          |
|-----------------------|------------------|--------------------------------------------------------------------------------------------------------------------------|
| Enrichment Score:     |                  |                                                                                                                          |
| Annotation Cluster 21 | 2.37776948051717 |                                                                                                                          |
| Category              | Term             | Genes                                                                                                                    |
| SP_PIR_KEYWORDS       | magnesium        | MENC, PRS, NDK, VSR, XTHA, RFBA, TATD, YBHA, EXOX, YCJG, NUDG, HEMB, NUDJ, SPED, NUDL, LIGA, PHOQ, YCHF, RUVK, GPT, NUDB |

|                       |                                   |                                                                                                                      |
|-----------------------|-----------------------------------|----------------------------------------------------------------------------------------------------------------------|
| Enrichment Score:     |                                   |                                                                                                                      |
| Annotation Cluster 22 | 2.239125122589122                 |                                                                                                                      |
| Category              | Term                              | Genes                                                                                                                |
| SP_PIR_KEYWORDS       | protein biosynthesis              | RPSB, RPMI, RPSA, POXA, TSF, ASPS, GLTX, TYRS, ASNS, RPMF, RPLY, INFC, PRFA, ARGS, YCIH, RPLT                        |
| GOTERM_BP_FAT         | GO:0006412~translation            | RPSB, RPMI, RPSA, RBBA, POXA, TSF, YADB, ASPS, GLTX, TYRS, CITG, ASNS, RPMF, RPLY, PRFA, INFC, ARGS, PTH, YCIH, RPLT |
| GOTERM_BP_FAT         | GO:0006399~tRNA metabolic process | TTCA, POXA, YADB, ASPS, GLTX, MNMA, RNT, TYRS, ASNS, DUSC, QUEC, QUEA, YEDF, ARGS, TRMA, DUSA, PTH, RND, CMOA, CMOB  |

|                       |                                     |                                                                                                |
|-----------------------|-------------------------------------|------------------------------------------------------------------------------------------------|
| Enrichment Score:     |                                     |                                                                                                |
| Annotation Cluster 23 | 2.2004469576790546                  |                                                                                                |
| Category              | Term                                | Genes                                                                                          |
| SP_PIR_KEYWORDS       | electron transport                  | YDIR, TORC, MIOC, YNFG, TORY, HYFA, SDHC, FIXB, FIXA, RSXC, YDBK, NORV, DMSB                   |
| GOTERM_BP_FAT         | GO:0022900~electron transport chain | YDIR, TORC, MIOC, YNFG, YDHU, YNFH, TORY, HYFA, SDHC, FIXB, FIXA, RSXC, YDBK, NORV, DMSC, DMSB |



|               |                                                           |                                                                                                                                                                             |
|---------------|-----------------------------------------------------------|-----------------------------------------------------------------------------------------------------------------------------------------------------------------------------|
|               | GO:0006091~generation of precursor metabolites and energy | NARP, FRDD, HYPF, FUMB, YNFG, YDHU, YNFH, YDBK, NORV, DMSC, DMSB, TORA, YDIR, MENC, MENE, TORC, MENA, ATPI, MIOC, PDXY, TORY, UBIC, HYFA, FIXB, SDHC, FIXA, MLTD, RSXC, RHO |
| GOTERM_BP_FAT |                                                           |                                                                                                                                                                             |
|               | GO:0009055~electron carrier activity                      | YDHO, YDHY, YNFE, YDHX, YNFF, YNFG, YDHU, YDHV, YDBK, YHIN, NORV, DMSB, YDIR, TORA, YDIS, YFHL, TORC, TAUD, TORZ, TORY, HYFA, FIXB, SDHC, FIXA, YCAK, RSXC, YDGJ            |
| GOTERM_MF_FAT |                                                           |                                                                                                                                                                             |

|               |                                                               |                                                                                |
|---------------|---------------------------------------------------------------|--------------------------------------------------------------------------------|
|               | Enrichment Score:<br>Annotation Cluster 24 2.0931419364395585 |                                                                                |
| Category      | Term                                                          | Genes                                                                          |
|               | GO:0042280~cell surface antigen activity, host-interacting    | RFAG, RFBA, RFC, CLD, RFBB, WAAU, LPXM, RFAY, UGD, ASMA, GLF, WAAA, RFBX, LPXH |
| GOTERM_MF_FAT |                                                               |                                                                                |

|               |                                                                |                                                                                                                                                                             |
|---------------|----------------------------------------------------------------|-----------------------------------------------------------------------------------------------------------------------------------------------------------------------------|
|               | Enrichment Score:<br>Annotation Cluster 25 2.053075187608088   |                                                                                                                                                                             |
| Category      | Term                                                           | Genes                                                                                                                                                                       |
|               | GO:0009061~anaerobic respiration                               | TORA, MENC, NARP, MENE, FRDD, TORC, MENA, HYPF, FUMB, YNFH, HYFA, MLTD, DMSC, DMSB                                                                                          |
| GOTERM_BP_FAT |                                                                |                                                                                                                                                                             |
|               | GO:0006091~generation of precursor metabolites and energy      | NARP, FRDD, HYPF, FUMB, YNFG, YDHU, YNFH, YDBK, NORV, DMSC, DMSB, TORA, YDIR, MENC, MENE, TORC, MENA, ATPI, MIOC, PDXY, TORY, UBIC, HYFA, FIXB, SDHC, FIXA, MLTD, RSXC, RHO |
| GOTERM_BP_FAT |                                                                |                                                                                                                                                                             |
|               | GO:0045333~cellular respiration                                | TORA, MENC, NARP, FRDD, MENE, TORC, MENA, HYPF, FUMB, YDHU, YNFH, UBIC, HYFA, SDHC, MLTD, DMSC, DMSB                                                                        |
| GOTERM_BP_FAT |                                                                |                                                                                                                                                                             |
|               | GO:0015980~energy derivation by oxidation of organic compounds | TORA, MENC, NARP, FRDD, MENE, TORC, MENA, HYPF, FUMB, YDHU, YNFH, UBIC, HYFA, SDHC, MLTD, DMSC, DMSB                                                                        |
| GOTERM_BP_FAT |                                                                |                                                                                                                                                                             |

|               |                                                               |                       |
|---------------|---------------------------------------------------------------|-----------------------|
|               | Enrichment Score:<br>Annotation Cluster 26 2.0181174053842446 |                       |
| Category      | Term                                                          | Genes                 |
|               | GO:0032392~DNA geometric change                               | REP, TOPA, TOPB, UVRD |
| GOTERM_BP_FAT |                                                               |                       |
|               | GO:0006268~DNA unwinding during replication                   | REP, TOPA, TOPB, UVRD |
| GOTERM_BP_FAT |                                                               |                       |
|               | GO:0032508~DNA duplex unwinding                               | REP, TOPA, TOPB, UVRD |
| GOTERM_BP_FAT |                                                               |                       |

| Enrichment Score:     |                     |                                    |
|-----------------------|---------------------|------------------------------------|
| Annotation Cluster 27 | 1.986185618719747   |                                    |
| Category              | Term                | Genes                              |
| SP_PIR_KEYWORDS       | carbon-oxygen lyase | CAIB, HEMB, SDAA, CITG, RFBB, FUMB |

| Enrichment Score:     |                                     |                                                                                                                                                                                      |
|-----------------------|-------------------------------------|--------------------------------------------------------------------------------------------------------------------------------------------------------------------------------------|
| Annotation Cluster 28 | 1.7973700508440689                  |                                                                                                                                                                                      |
| Category              | Term                                | Genes                                                                                                                                                                                |
| GOTERM_MF_FAT         | GO:0042623~ATPase activity, coupled | RBBA, TBPA, YCBZ, MSBA, UVRD, MDLA, MDLB, COBT, TAUB, COBS, RECG, LHR, YBHA, ZNUB, REP, SBMA, YOAA, MFD, RECQ, MODC, MODE, PRIA, POTA                                                |
| GOTERM_MF_FAT         | GO:0016887~ATPase activity          | RBBA, MSBA, COBT, COBS, RFBB, YBHA, YNJD, REP, SBMA, YOAA, SSUB, MFD, RECQ, TBPA, YCBZ, UVRD, MDLA, MDLB, TAUB, RECG, LHR, UUP, ZNUB, SAPF, ZNUC, SAPD, MODC, YEHX, MODE, PRIA, POTA |

| Enrichment Score:     |                      |                                                                                               |
|-----------------------|----------------------|-----------------------------------------------------------------------------------------------|
| Annotation Cluster 29 | 1.7758767688620878   |                                                                                               |
| Category              | Term                 | Genes                                                                                         |
| SP_PIR_KEYWORDS       | protein biosynthesis | RPSB, RPMI, RPSA, POXA, TSF, ASPS, GLTX, TYRS, ASNS, RPMF, RPLY, INFC, PRFA, ARGS, YCIH, RPLT |

| Enrichment Score:     |                                                      |                                                            |
|-----------------------|------------------------------------------------------|------------------------------------------------------------|
| Annotation Cluster 30 | 1.7359390499433547                                   |                                                            |
| Category              | Term                                                 | Genes                                                      |
| KEGG_PATHWAY          | eum00760:Nicotinate and nicotinamide metabolism      | USHA, NADD, PNCA, PNCA                                     |
| GOTERM_BP_FAT         | GO:0006733~oxidoreduction coenzyme metabolic process | UBIC, NADD, FEAB, SPED, RPIR, RPIB, RFBB, PNCA, PNCA       |
| GOTERM_BP_FAT         | GO:0043603~cellular amide metabolic process          | NADD, FEAB, BIRA, RPIR, RPIB, RFBB, GLXK, PNCA, PNCA, ALLD |

| Enrichment Score:     |                                          |                                                |
|-----------------------|------------------------------------------|------------------------------------------------|
| Annotation Cluster 31 | 1.7051146459393889                       |                                                |
| Category              | Term                                     | Genes                                          |
| UP_SEQ_FEATURE        | domain:GGDEF                             | YEAJ, YDEH, YNEF, YFIN, YEGE, YLIF, YEDQ, YEAP |
| INTERPRO              | IPR000160:Diguanylate cyclase, predicted | YEAJ, YDEH, YNEF, YFIN, YEGE, YLIF, YEDQ, YEAP |
| SMART                 | SM00267:DUF1                             | YEAJ, YDEH, YNEF, YFIN, YEGE, YLIF, YEDQ, YEAP |

| Enrichment Score:  |                                                              |                                                                                        |
|--------------------|--------------------------------------------------------------|----------------------------------------------------------------------------------------|
| Annotation Cluster | Term                                                         | Genes                                                                                  |
| 32                 | 1.702535503602171                                            |                                                                                        |
| KEGG_PATHWAY       | eco00130:Ubiquinone and other terpenoid-quinone biosynthesis | MENC, UBIC, MENE, MENA                                                                 |
| GOTERM_BP_FAT      | GO:0042373~vitamin K metabolic process                       | MENC, MENE, MENA                                                                       |
| Enrichment Score:  |                                                              |                                                                                        |
| 33                 | 1.658411641193403                                            |                                                                                        |
| GOTERM_BP_FAT      | GO:0006596~polyamine biosynthetic process                    | PURR, SPED, POTB, POTA, POTD, POTC                                                     |
| GOTERM_BP_FAT      | GO:0006576~biogenic amine metabolic process                  | CAIB, PURR, RSSA, SPED, FIXB, FIXA, POTB, POTA, POTD, POTC                             |
| GOTERM_BP_FAT      | GO:0006575~cellular amino acid derivative metabolic process  | CAIB, PURR, RSSA, SPED, FIXB, FIXA, POTB, POTA, POTD, POTC                             |
| Enrichment Score:  |                                                              |                                                                                        |
| 34                 | 1.6479465883471112                                           |                                                                                        |
| SP_PIR_KEYWORDS    | cell wall biogenesis/degradation                             | MRCB, YCJG, MRDA, MLTF, MRCA, AMID, AMIC, ALR, MLTD                                    |
| GOTERM_BP_FAT      | GO:0044036~cell wall macromolecule metabolic process         | MLTF, ARRD, YIEL, ALR, YAGH, HIPA, HIPB, MRCB, MRDA, PRC, AMPC, MRCA, AMIC, ESSD, MLTD |
| SP_PIR_KEYWORDS    | multifunctional enzyme                                       | MRCB, USHA, MRDA, MRCA, COBU, YAGH                                                     |
| GOTERM_BP_FAT      | GO:0000270~peptidoglycan metabolic process                   | MRCB, MRDA, ARRD, MPPA, PRC, AMPC, MRCA, AMID, AMIC, ALR, HIPA, HIPB                   |
| GOTERM_BP_FAT      | GO:0045229~external encapsulating structure organization     | MRCB, ETK, MRDA, MLTF, ECPD, MRCA, AMID, AMIC, YCBF, ALR, MLTD, YCBR                   |

|               |                                             |                                                                 |
|---------------|---------------------------------------------|-----------------------------------------------------------------|
| GOTERM_BP_FAT | GO:0007047~cell wall organization           | MRCB, MRDA, MLTF, ECPD, MRCA, AMID, AMIC, YCBF, ALR, MLTD, YCBR |
| GOTERM_BP_FAT | GO:0022604~regulation of cell morphogenesis | MRCB, MRDA, MRDB, MRCA, ALR                                     |
| GOTERM_BP_FAT | GO:0008360~regulation of cell shape         | MRCB, MRDA, MRDB, MRCA, ALR                                     |
| GOTERM_MF_FAT | GO:0031406~carboxylic acid binding          | MRCB, MRDA, MRCA, TAUD                                          |

Enrichment Score:  
Annotation Cluster 35 1.5605840048726978

| Category      | Term                         | Genes                                                                |
|---------------|------------------------------|----------------------------------------------------------------------|
| GOTERM_BP_FAT | GO:0008033~tRNA processing   | TTCA, YEDF, TRMA, DUSA, MNMA, RNT, RND, DUSC, QUEC, CMOA, CMOB, QUEA |
| GOTERM_BP_FAT | GO:0006400~tRNA modification | TRMA, MNMA, QUEC, CMOA, CMOB, QUEA                                   |

Enrichment Score:  
Annotation Cluster 36 1.5539025681134444

| Category      | Term                                              | Genes                                                                                                                                                                                                                                                                                         |
|---------------|---------------------------------------------------|-----------------------------------------------------------------------------------------------------------------------------------------------------------------------------------------------------------------------------------------------------------------------------------------------|
| GOTERM_BP_FAT | GO:0044271~nitrogen compound biosynthetic process | PRS, HEMA, HEMB, PNCB, PNCA, TMK, PABC, BIRA, ATP1, PABB, ALR, QUEC, YBCF, TYRP, QUEA, PURB, AROM, PYRF, PYRH, MODC, MODE, PURR, APBE, COBU, COBT, NDK, COBS, RFBB, YBHA, LTAE, SPED, SDAC, NUDB, LEUO, NADD, IVBL, FEAB, FOLA, PHEP, FOLK, GPT, ILVY, POTB, POTA, POTD, POTC, UDK, RHO, ANSP |
| GOTERM_BP_FAT | GO:0009309~amine biosynthetic process             | LEUO, PURR, IVBL, PABC, ALR, PABB, QUEC, YBCF, TYRP, LTAE, AROM, FOLA, PYRH, PHEP, SPED, FOLK, SDAC, ILVY, POTB, POTA, NUDB, POTD, ANSP, POTC                                                                                                                                                 |
| GOTERM_BP_FAT | GO:0046394~carboxylic acid biosynthetic process   | LEUO, PURR, IVBL, PLSX, PABC, BIRA, FABF, ALR, PABB, QUEC, YBCF, TYRP, LTAE, AROM, FOLA, UBIC, PYRH, PHEP, ACPH, FOLK, SDAC, ILVY, NUDB, ANSP                                                                                                                                                 |

Enrichment Score:  
Annotation Cluster 37 1.5406026077580997

| Category        | Term                                | Genes                  |
|-----------------|-------------------------------------|------------------------|
| PIR_SUPERFAMILY | PIRSF004763:transpositer, EamA type | YICL, EAMA, YEDA, RHTA |
| UP_SEQ_FEATURE  | domain:DUF6 1                       | YICL, EAMA, YEDA, RHTA |
| UP_SEQ_FEATURE  | domain:DUF6 2                       | YICL, EAMA, YEDA, RHTA |

|          |                                       |                              |
|----------|---------------------------------------|------------------------------|
|          | IPR000620:Protein of unknown function |                              |
|          | DUF6, transmembrane                   |                              |
| INTERPRO |                                       | YDDG, YICL, EAMA, YEDA, RHTA |

|                       |                                               |                                               |
|-----------------------|-----------------------------------------------|-----------------------------------------------|
|                       | Enrichment Score:                             |                                               |
| Annotation Cluster 38 | 1.5068746619855726                            |                                               |
| Category              | Term                                          | Genes                                         |
| GOTERM_BP_FAT         | GO:0009432~SOS response                       | RFAG, UVRC, YDJM, UVRD, RECQ, CHO             |
| GOTERM_BP_FAT         | GO:0009991~response to extracellular stimulus | RFAG, YCAI, UVRC, YDJM, UVRD, RECQ, RSPA, CHO |

|                       |                                        |                                                                                                            |
|-----------------------|----------------------------------------|------------------------------------------------------------------------------------------------------------|
|                       | Enrichment Score:                      |                                                                                                            |
| Annotation Cluster 39 | 1.5007453875427932                     |                                                                                                            |
| Category              | Term                                   | Genes                                                                                                      |
| SP_PIR_KEYWORDS       | iron-sulfur protein                    | HYFA, RSXC, YNFE, YNFF, YDBK, FUMB, YNFG, DMSB                                                             |
| SP_PIR_KEYWORDS       | 4fe-4s                                 | YFHL, YDHY, YNFE, YNFF, FUMB, YDHX, YNFG, RLMN, HYFA, YDEP, SDAA, YGIQ, RSXC, YJIL, YDBK, DMSB, RUMB       |
| SP_PIR_KEYWORDS       | iron-sulfur                            | YFHL, YDHY, YNFE, YNFF, FUMB, YDHX, YNFG, RLMN, HYFA, YDEP, SDAA, YGIQ, RSXC, YJIL, YDBK, DMSB, RUMB       |
| PIR_SUPERFAMILY       | PIRSF000246:NrfC protein               | HYFA, YNFG, DMSB                                                                                           |
| GOTERM_MF_FAT         | GO:0051540~metal cluster binding       | YFHL, YDHY, YNFE, YNFF, FUMB, YDHX, YNFG, YDHV, RLMN, HYFA, YDEP, YGIQ, SDAA, RSXC, YJIL, YDBK, DMSB, RUMB |
| GOTERM_MF_FAT         | GO:0051536~iron-sulfur cluster binding | YFHL, YDHY, YNFE, YNFF, FUMB, YDHX, YNFG, YDHV, RLMN, HYFA, YDEP, YGIQ, SDAA, RSXC, YJIL, YDBK, DMSB, RUMB |

|                       |                                    |                        |
|-----------------------|------------------------------------|------------------------|
|                       | Enrichment Score:                  |                        |
| Annotation Cluster 40 | 1.4402017226006012                 |                        |
| Category              | Term                               | Genes                  |
| KEGG_PATHWAY          | ecd00020:Citrate cycle (TCA cycle) | FRDD, CITD, SDHC, FUMB |

|                       |                                 |                              |
|-----------------------|---------------------------------|------------------------------|
|                       | Enrichment Score:               |                              |
| Annotation Cluster 41 | 1.4393806207571282              |                              |
| Category              | Term                            | Genes                        |
| GOTERM_BP_FAT         | GO:0019395~fatty acid oxidation | PRPR, MHPA, MHPB, PRPE, PRPB |

|                       |                                                                 |                                                                                                                          |
|-----------------------|-----------------------------------------------------------------|--------------------------------------------------------------------------------------------------------------------------|
|                       | GO:0006631~fatty acid metabolic process                         | PRPR, MHPA, MHPB, ACPH, PLSX, FABF, PRPE, FADK, PRPB                                                                     |
| Enrichment Score:     |                                                                 |                                                                                                                          |
| Annotation Cluster 42 | 1.4227698126905468                                              |                                                                                                                          |
| Category              | Term                                                            | Genes                                                                                                                    |
| KEGG_PATHWAY          | ect00564:Glycerophospholipid metabolism                         | PLDA, YNBB, PGPB, PGSA                                                                                                   |
| Enrichment Score:     |                                                                 |                                                                                                                          |
| Annotation Cluster 43 | 1.4146110658050493                                              |                                                                                                                          |
| Category              | Term                                                            | Genes                                                                                                                    |
| KEGG_PATHWAY          | ecc03410:Base excision repair                                   | LIGA, XTHA, ALKA                                                                                                         |
| Enrichment Score:     |                                                                 |                                                                                                                          |
| Annotation Cluster 44 | 1.4115261332668156                                              |                                                                                                                          |
| Category              | Term                                                            | Genes                                                                                                                    |
| GOTERM_BP_FAT         | GO:0034621~cellular macromolecular complex subunit organization | PRFA, TORC, SDHC, MLTD, CCMG, CCMH, RPLT, RHO, CCMF                                                                      |
| GOTERM_BP_FAT         | GO:0034622~cellular macromolecular complex assembly             | TORC, SDHC, MLTD, CCMG, CCMH, RPLT, CCMF                                                                                 |
| GOTERM_BP_FAT         | GO:0017004~cytochrome complex assembly                          | TORC, SDHC, MLTD, CCMG, CCMH, CCMF                                                                                       |
| SP_PIR_KEYWORDS       | heme                                                            | TORY, TORC, SDHC, EFEB, CCMH                                                                                             |
| GOTERM_BP_FAT         | GO:0043933~macromolecular complex subunit organization          | PRFA, TORC, SDHC, MLTD, CCMG, CCMH, RPLT, RHO, CCMF                                                                      |
| Enrichment Score:     |                                                                 |                                                                                                                          |
| Annotation Cluster 45 | 1.392104367613481                                               |                                                                                                                          |
| Category              | Term                                                            | Genes                                                                                                                    |
| SP_PIR_KEYWORDS       | phosphoprotein two-component regulatory system                  | YEDV, ETK, RPSA, YEDW, NARP, CITD, KDPD, PPHA, NDK, ALR, RSSB, CAIC, LTAE, INFC, UHPB, CMTA, UHPA, BAES, UGD, PHOQ, PHOP |
| SP_PIR_KEYWORDS       | regulatory system                                               | YEDV, YEDW, PRPR, NARP, UHPB, UHPA, BAES, PHOQ, KDPD, PHOP, RSSB                                                         |

|  |                                                                    |                                                                                    |
|--|--------------------------------------------------------------------|------------------------------------------------------------------------------------|
|  | GO:0000160~two-component signal transduction system (phosphorelay) | YEDV, NARP, YEDW, KDPD, RSSB, SDIA, PRPR, YEGE, UHPB, MATA, UHPA, BAES, PHOQ, PHOP |
|--|--------------------------------------------------------------------|------------------------------------------------------------------------------------|

|                       |                                                     |                                                                          |
|-----------------------|-----------------------------------------------------|--------------------------------------------------------------------------|
|                       | Enrichment Score:                                   |                                                                          |
| Annotation Cluster 46 | 1.382769664742016                                   |                                                                          |
| Category              | Term                                                | Genes                                                                    |
| SP_PIR_KEYWORDS       | nuclease                                            | RNB, RNT, RND, VSR, XTHA, RUVC, TATD, RECE, EXOX                         |
|                       | GO:0006308~DNA catabolic process                    | UVRC, RNT, VSR, XTHA, RECE, EXOX                                         |
| GOTERM_BP_FAT         | GO:0044265~cellular macromolecule catabolic process | UVRC, RNB, RNT, RND, VSR, XTHA, RECE, EXOX                               |
|                       | GO:0009057~macro molecule catabolic process         | UVRC, YIEL, ARRD, RNT, VSR, XTHA, YAGH, RECE, EXOX, RNB, AMID, RND, AMIC |
| GOTERM_BP_FAT         | exonuclease                                         | RNB, RNT, RND, XTHA, RECE, EXOX                                          |
| SP_PIR_KEYWORDS       | GO:0004527~exonuclease activity                     | HOLB, RNB, RNT, RND, XTHA, RECE, EXOX, DNAN                              |

|                       |                                              |                                                                                                                                   |
|-----------------------|----------------------------------------------|-----------------------------------------------------------------------------------------------------------------------------------|
|                       | Enrichment Score:                            |                                                                                                                                   |
| Annotation Cluster 47 | 1.369053927775673                            |                                                                                                                                   |
| Category              | Term                                         | Genes                                                                                                                             |
| UP_SEQ_FEATURE        | domain:HTH lysR-type                         | LEUO, YDHB, YFER, YNFL, CYNR, PERR, YEAT, ILVY, YBHD, XAPR, ABGR, YHJC                                                            |
|                       | IPR000847:Bacterial regulatory protein, LysR | LEUO, YNFL, YFER, CYNR, YEAT, YBHD, ABGR, YHJC, YDHB, PERR, ILVY, MODE, XAPR                                                      |
| INTERPRO              | IPR011991:Winged helix repressor DNA-binding | LEUO, NARP, YFER, YNFL, DGOR, YBAO, BIRA, CYNR, YEAT, YBHD, ABGR, YHJC, REP, SDIA, YDHB, MATA, UHPA, PERR, ILVY, MODE, XAPR, YDFH |
| INTERPRO              |                                              |                                                                                                                                   |

|                       |                                            |                                                        |
|-----------------------|--------------------------------------------|--------------------------------------------------------|
|                       | Enrichment Score:                          |                                                        |
| Annotation Cluster 48 | 1.3564123034236524                         |                                                        |
| Category              | Term                                       | Genes                                                  |
| SP_PIR_KEYWORDS       | helicase                                   | REP, YOAA, UVRD, MFD, RECQ, YEJH, RECG, LHR, PRIA, RHO |
|                       | GO:0008026~ATP-dependent helicase activity | REP, YOAA, UVRD, MFD, RECQ, RECG, LHR, PRIA            |
| GOTERM_MF_FAT         | GO:0004386~helicase activity               | REP, YOAA, UVRD, MFD, RECQ, YEJH, RECG, LHR, PRIA, RHO |
| GOTERM_MF_FAT         |                                            |                                                        |

---

Enrichment Score:

Annotation Cluster 49 1.3381057234748042

---

| Category     | Term                        | Genes           |
|--------------|-----------------------------|-----------------|
| KEGG_PATHWAY | eci03018:RNA<br>degradation | PCNB, RECQ, RHO |

---
