# Supplementary material for: Central role for RNase YbeY in Hfq-dependent and Hfq-independent small-RNA regulation in bacteria
Source: PubMed Central journal article supplement (PMC3933206; doi:10.1186/1471-2164-15-121), 2014-02-11
Supplement: 1471-2164-15-121-S5.pdf [file 1471-2164-15-121-S5.pdf]

**Supplemental Table 5. Functional clusters of genes differentially down-regulated in *ΔybeY* vs. WT under unstressed state**

| Enrichment Score:    |                                                                |                                                                                                                                                                                                                                                                                                                                                                                                                                                                                                                                             |
|----------------------|----------------------------------------------------------------|---------------------------------------------------------------------------------------------------------------------------------------------------------------------------------------------------------------------------------------------------------------------------------------------------------------------------------------------------------------------------------------------------------------------------------------------------------------------------------------------------------------------------------------------|
| Annotation Cluster 1 | 30.118016535325918                                             |                                                                                                                                                                                                                                                                                                                                                                                                                                                                                                                                             |
| Category             | Term                                                           | Genes                                                                                                                                                                                                                                                                                                                                                                                                                                                                                                                                       |
| GOTERM_BP_FAT        | GO:0009061~anaerobic respiration                               | TDCE, NAPG, NAPH, FDNG, NAPF, HYPC, FDNI, NAPC, FDNH, HYPD, NARX, NAPD, NAPA, NAPB, NDH, HYPA, NRFD, NRFE, NRFB, NRFC, ACNB, NRFF, NRFG, NARH, NARG, YFID, NIKD, NARJ, LLDD, NARI, NIKE, NARL, GLTA, HYBG, HYBF, NRFA, HYBC, GLPB, HYBD, GLPA, HYBB, HYBO, GLPC, NIRB, YBIY, NIRD                                                                                                                                                                                                                                                           |
| GOTERM_BP_FAT        | GO:0015980~energy derivation by oxidation of organic compounds | TDCE, LDHA, NARX, NRFD, NRFE, NRFB, NRFC, ACNB, NRFF, NRFG, NARH, NARG, YFID, NARJ, NIKD, NARI, NIKE, NARL, GLTA, GLGB, HYBG, GLGC, HYBF, GLPB, HYBC, GLPA, HYBD, HYBB, HYBO, UBIX, GLPD, GLPC, GLGP, SUCB, ARCB, GLGX, UBIH, FRMA, NAPG, NAPH, FDNG, NAPF, HYPC, FDNI, NAPC, HYPD, FDNH, NAPD, NAPA, NAPB, NDH, HYPA, HYPB, GLGA, LLDD, NRFA, NIRB, YBIY, NIRD                                                                                                                                                                             |
| GOTERM_BP_FAT        | GO:0006091~generation of precursor metabolites and energy      | TDCE, LDHA, NARX, NRFD, NRFE, NRFB, NRFC, ACNB, NRFF, ZNTA, NRFG, NARH, PGI, NARG, YFID, NIKD, NARJ, NIKE, NARI, NARL, GLTA, PGK, GLGB, HYBG, GLGC, GLCF, HYBF, GLPB, HYBC, GLPA, HYBD, HYBB, UBIX, HYBO, GLPD, GLPC, GLGP, SUCB, ARCB, GPMA, DIPZ, GLGX, UBIH, YGCO, FRMA, NAPG, NAPH, FDNG, NAPF, NAPC, FDNI, HYPC, HYPD, FDNH, NAPD, FBAA, NAPA, NAPB, NDH, HYPA, HYPB, YQCA, GLGA, LLDD, NRFA, NIRB, CYBC, YBIY, NIRD, CSRA, GLK, YFAE                                                                                                  |
| GOTERM_BP_FAT        | GO:0045333~cellular respiration                                | TDCE, NARX, NRFD, NRFE, NRFB, NRFC, ACNB, NRFF, NRFG, NARH, NARG, YFID, NARJ, NIKD, NARI, NIKE, NARL, GLTA, HYBG, HYBF, HYBC, GLPB, GLPA, HYBD, HYBB, HYBO, UBIX, GLPD, GLPC, SUCB, ARCB, UBIH, NAPG, NAPH, FDNG, NAPF, HYPC, FDNI, NAPC, FDNH, NAPD, HYPD, NAPA, NAPB, HYPA, NDH, LLDD, NRFA, NIRB, YBIY, NIRD                                                                                                                                                                                                                             |
| Enrichment Score:    |                                                                |                                                                                                                                                                                                                                                                                                                                                                                                                                                                                                                                             |
| Annotation Cluster 2 | 17.021450432870655                                             |                                                                                                                                                                                                                                                                                                                                                                                                                                                                                                                                             |
| Category             | Term                                                           | Genes                                                                                                                                                                                                                                                                                                                                                                                                                                                                                                                                       |
| SP_PIR_KEYWORDS      | metal-binding                                                  | MAEB, CPDB, TDCG, GLDA, APHA, GLPK, ALAS, NRFB, NRFC, LUXS, ACNB, GUDD, KATG, NRFF, ZNTA, NARH, NARG, GLTD, RECR, NARI, NANK, MALS, YQHD, PGM, HEMN, GLTB, GLCF, ARGE, HYBF, YBGI, PEPD, HYBC, HYBD, MOEA, HYBB, GLPF, HYBO, GLPC, CLPX, NIKR, GSHB, YGCO, YBJI, PEPP, FRMA, PTRA, GUDX, NAPG, NAPH, FDNG, NAPF, NAPC, FDNI, HYPD, FBAA, FDNH, ISPH, NAPA, NAPB, AMPD, HYPA, HYPB, NUDF, MOAA, PTSA, CDD, YFGC, NRDB, TAG, YGGW, YFBR, NRFA, FUCI, IDND, DAPE, YAEI, NIRB, CYBC, YBIY, HFLB, ISPB, YBEY, GLMM, DEOB, YFAW, SODA, FUCA, YFAE |
| SP_PIR_KEYWORDS      | iron                                                           | NAPG, NAPH, FDNG, TDCG, NAPF, FDNI, NAPC, FDNH, ISPH, NAPA, NAPB, NRFB, NRFC, ACNB, LUXS, MOAA, KATG, NRFF, NARH, GLTD, FECA, NARG, FECB, FECC, NARI, NRDB, HEMN, GLTB, YGGW, GLCF, NRFA, HYBC, FECE, FECD, HYBB, HYBO, FUCO, FECR, GLPC, NIRB, CYBC, YBIY, YGCO, YFAE                                                                                                                                                                                                                                                                      |

|               |                        |                                                                                                                                                                                                                                                                                                                                                                                                                                                                                                                                                                                                                                                                                                                |
|---------------|------------------------|----------------------------------------------------------------------------------------------------------------------------------------------------------------------------------------------------------------------------------------------------------------------------------------------------------------------------------------------------------------------------------------------------------------------------------------------------------------------------------------------------------------------------------------------------------------------------------------------------------------------------------------------------------------------------------------------------------------|
| GOTERM_MF_FAT | GO:0043167~ion binding | MAEB, GLDA, QOR, APHA, ALAS, GUDD, KATG, FECA, GLTD, NIKD, FECB, RECR, NIKE, FECC, NANK, MALS, YQHD, PGM, NIKC, MALQ, GLTB, GLCF, ARGE, HYBF, HYBC, HYBD, FECE, HYBB, FECD, HYBO, FECR, CLPX, NIKR, YGCO, YBJI, LNT, PTR, MIAA, PPX, NAPG, NAPH, NAPF, NAPC, FBAA, NAPA, ISPH, NAPB, YQCA, NUDF, MOAA, PTSA, CDD, YFGC, NRDB, YGGW, NRFA, FTNB, DAPE, NIRB, YBEY, GLMM, DEOB, YFAE, CPDB, TDCG, PCK, GLPK, YJCE, NRFB, NRFC, LUXS, ACNB, ZNTA, NRFF, NARH, NARG, NARI, HEMN, GLGB, YIIM, PEPD, YBGI, MOEA, GLPF, GLPC, ZUPT, DGT, GLGX, GSHB, PEPP, FRMA, GUDX, FDNG, YIDK, FDNI, HYPD, FDNH, AMPD, HYPA, HYPB, YHDH, YFBR, FUCI, IDND, FUCO, NADK, YAEI, CYBC, YBIY, HFLB, BGLA, SODA, YFAW, CLCA, FUCA, KEFB |
|---------------|------------------------|----------------------------------------------------------------------------------------------------------------------------------------------------------------------------------------------------------------------------------------------------------------------------------------------------------------------------------------------------------------------------------------------------------------------------------------------------------------------------------------------------------------------------------------------------------------------------------------------------------------------------------------------------------------------------------------------------------------|

|                                                                                                                                                                                                                                                                                                                                                                                                                                                                                                                                                                                                                                                                                   |                    |
|-----------------------------------------------------------------------------------------------------------------------------------------------------------------------------------------------------------------------------------------------------------------------------------------------------------------------------------------------------------------------------------------------------------------------------------------------------------------------------------------------------------------------------------------------------------------------------------------------------------------------------------------------------------------------------------|--------------------|
| Enrichment Score:                                                                                                                                                                                                                                                                                                                                                                                                                                                                                                                                                                                                                                                                 |                    |
| Annotation Cluster 3                                                                                                                                                                                                                                                                                                                                                                                                                                                                                                                                                                                                                                                              | 12.976456235337231 |
| Category                                                                                                                                                                                                                                                                                                                                                                                                                                                                                                                                                                                                                                                                          | Term               |
| SP_PIR_KEYWORDS                                                                                                                                                                                                                                                                                                                                                                                                                                                                                                                                                                                                                                                                   | membrane           |
| Genes                                                                                                                                                                                                                                                                                                                                                                                                                                                                                                                                                                                                                                                                             |                    |
| GUDP, NANC, YGAZ, YQAA, MALF, YOHJ, MALG, ATOS, NANT, MALK, YGBE, FECA, NIKD, NIKE, FECC, NIKC, ACRD, HYBC, FECE, HYBB, FECD, SYD, HYBO, YJET, YCCA, GLTP, NUPG, YHHQ, ARGO, DIPZ, YBJP, YGDR, LNT, YHHN, YTFB, PPX, NAPH, NAPC, OMPC, PPK, YFGA, GLNQ, YFGG, LAMB, GLNP, YGGT, YQJE, YHAH, MTGA, YJHB, PHNC, CPXA, PHNE, CCMA, NIRC, YHFL, TSX, YIHN, TDCC, DCUA, DCUC, NARX, YFEO, NRFD, YJCE, NRFE, ZNTA, NARH, NARG, NARI, YAFY, NARK, GLPB, GSPO, GLPA, GSPL, GSPM, GLPF, GLPC, YPDA, RSEA, ZUPT, XYLE, RSEC, XYLH, MURG, YHCB, ARCB, EVGS, AAEX, YIDK, FDNI, FDNH, YJJP, ENVZ, YJL, NDH, FTSW, YJJB, YPJD, YJIY, YFJD, FUCP, HFLC, HFLB, HFLK, YGJR, YFAV, CLCA, DEDA, KEFB |                    |

|                                                                                                                                                                                       |                               |
|---------------------------------------------------------------------------------------------------------------------------------------------------------------------------------------|-------------------------------|
| Enrichment Score:                                                                                                                                                                     |                               |
| Annotation Cluster 4                                                                                                                                                                  | 9.590868001005862             |
| Category                                                                                                                                                                              | Term                          |
| SP_PIR_KEYWORDS                                                                                                                                                                       | phosphoprotein                |
| Genes                                                                                                                                                                                 |                               |
| THRC, FDNG, NARX, ENVZ, ATOS, PPK, ZNTA, PTSA, CPXR, NARL, TDCB, PGM, GLNL, MALP, RFFA, GLNG, EVGA, GLNA, CPXA, GLGP, YPDB, NPR, GCVP, ARCB, GPMA, EVGS, BAER, QSEB, GLMM, OMPR, BASR |                               |
| KEGG_PATHWAY                                                                                                                                                                          | ect02020:Two-component system |
| FDNG, FDNI, NARX, FDNH, ENVZ, OMPC, ATOS, NARH, NARG, NARJ, CPXR, NARI, NARL, GLNL, GLNG, EVGA, GLNA, CPXA, ARCB, EVGS, BAER, QSEB, OMPR, BASR, CSRA                                  |                               |

|                                                                                                                                                                                 |                   |
|---------------------------------------------------------------------------------------------------------------------------------------------------------------------------------|-------------------|
| Enrichment Score:                                                                                                                                                               |                   |
| Annotation Cluster 5                                                                                                                                                            | 9.449743575603822 |
| Category                                                                                                                                                                        | Term              |
| SP_PIR_KEYWORDS                                                                                                                                                                 | periplasm         |
| Genes                                                                                                                                                                           |                   |
| CPDB, FDNG, YTFJ, YCFS, NAPA, NAPB, MALE, APHA, TESA, MALM, NRFB, NRFF, NANM, FECB, MALS, SLT, GLNH, NRFA, HYBO, DSBA, FECR, DACB, RSEB, CYBC, RNA, FKLB, PPIA, HISJ, PTR, DCRB |                   |

|                 |        |                                                                                                                                                                                                                                                                                                                                            |
|-----------------|--------|--------------------------------------------------------------------------------------------------------------------------------------------------------------------------------------------------------------------------------------------------------------------------------------------------------------------------------------------|
| SP_PIR_KEYWORDS | signal | NANC, CPDB, MALG, YCFS, MALE, APHA, YPEC, MALM, TESA, NRFB, NRFC, NRFF, FECA, NANM, FECB, FECC, YAFY, MALS, SLT, NIKC, YACC, HYBO, RSEB, XYLE, RNA, EVGS, DIPZ, YBJP, YGDR, LNT, DCRB, PTRA, NAPG, FDNG, YHDP, YTFJ, NAPA, YNFD, ENVZ, NAPB, OMPC, YJEI, LAMB, YPFG, YFGC, GLNH, NRFA, DSBA, DACB, YJHS, CYBC, HFLB, PPIA, YEEZ, TSX, HISJ |
|-----------------|--------|--------------------------------------------------------------------------------------------------------------------------------------------------------------------------------------------------------------------------------------------------------------------------------------------------------------------------------------------|

Annotation Cluster 6 Enrichment Score: 8.920744709462836

| Category        | Term                | Genes                                                                                                |
|-----------------|---------------------|------------------------------------------------------------------------------------------------------|
| SP_PIR_KEYWORDS | metalloprotein      | NRFA, HYBC, FDNG, NAPC, HYBO, FUCO, FDNH, NRFB, NRFC, YBIY, KATG, NARH, NARG, NARI, SODA, GLTB, FRMA |
| SP_PIR_KEYWORDS | electron transfer   | NRFB, NRFC, NRFA, NAPC, NARH, FDNH, NARG, NARI                                                       |
| SP_PIR_KEYWORDS | iron-sulfur protein | NRFC, FDNG, NARH, FDNH, NARG, GLTB                                                                   |

Annotation Cluster 7 Enrichment Score: 8.12897092247381

| Category      | Term                                         | Genes                                                                                                |
|---------------|----------------------------------------------|------------------------------------------------------------------------------------------------------|
| GOTERM_BP_FAT | GO:0043623~cellular protein complex assembly | NRFA, HYBB, NAPC, FDNI, NAPB, NRFE, NRFB, CCMA, CYBC, NRFF, DIPZ, FTSZ, NRFG, YPJD, NARI             |
| GOTERM_BP_FAT | GO:0017004~cytochrome complex assembly       | NRFA, HYBB, FDNI, NAPC, NAPB, NRFE, NRFB, CCMA, CYBC, NRFF, DIPZ, NRFG, NARI                         |
| GOTERM_BP_FAT | GO:0006461~protein complex assembly          | NRFA, HYBB, NAPC, FDNI, RPON, NAPB, HYPB, NRFE, NRFB, CCMA, CYBC, NRFF, NRFG, DIPZ, FTSZ, YPJD, NARI |

Annotation Cluster 8 Enrichment Score: 7.7692984628488695

| Category        | Term                                                                                | Genes                                                                                          |
|-----------------|-------------------------------------------------------------------------------------|------------------------------------------------------------------------------------------------|
| SP_PIR_KEYWORDS | nitrate assimilation                                                                | NIRB, NIRD, NIRC, NARH, NARG, NARX, NAPA, NARJ, NARI, NARL, NARK                               |
| GOTERM_MF_FAT   | GO:0016661~oxidoreductase activity, acting on other nitrogenous compounds as donors | NRFA, NAPG, NAPH, NAPC, NAPD, NAPA, NAPB, QUEF, NIRB, NRFB, NRFC, NIRD, NARH, NARG, NARJ, NARI |
| GOTERM_BP_FAT   | GO:0042128~nitrate assimilation                                                     | NIRB, NIRD, NIRC, NARH, NARG, NARX, NAPA, NARJ, NARI, NARL, NARK                               |
| KEGG_PATHWAY    | ecr00910:Nitrogen metabolism                                                        | NIRB, NRFA, GLNA, NIRD, NARH, GLTD, NARG, GCVT, NAPA, NARJ, NARI, GLTB                         |

Annotation Cluster 9 Enrichment Score: 5.687259051500477

| Category     | Term                                   | Genes                                                        |
|--------------|----------------------------------------|--------------------------------------------------------------|
| KEGG_PATHWAY | ecx00500:Starch and sucrose metabolism | GLGB, GLGC, GLGA, MAK, PGI, MALS, PGM, GLK, GLGP, MALQ, MALP |

Annotation Cluster 10 Enrichment Score: 4.795743011322636

| Category | Term | Genes |
|----------|------|-------|
|----------|------|-------|

|               |                                                      |                                                                           |
|---------------|------------------------------------------------------|---------------------------------------------------------------------------|
| KEGG_PATHWAY  | ecd00520:Amino sugar and nucleotide sugar metabolism | NANE, GLGC, NAGB, MAK, NAGA, PGI, GLMM, NANK, NANA, PGM, GLK              |
| GOTERM_BP_FAT | GO:0046364~monosaccharide biosynthetic process       | NANE, TDCG, PCK, NANA, NANT, NAGB, MURG, GPMA, NAGA, PGI, NANK, CSRA, PGK |

Annotation Cluster 11 Enrichment Score: 4.57442873804627

| Category        | Term                                  | Genes                                                 |
|-----------------|---------------------------------------|-------------------------------------------------------|
| SP_PIR_KEYWORDS | glycolysis                            | GPMA, PGI, FBAA, GLK, PGK                             |
| KEGG_PATHWAY    | ecd00010:Glycolysis / Gluconeogenesis | GALM, GPMA, PCK, PGI, FBAA, BGLA, PGM, GLK, PGK, FRMA |

Annotation Cluster 12 Enrichment Score: 4.302372669253555

| Category        | Term                                           | Genes                                                                                                                                                              |
|-----------------|------------------------------------------------|--------------------------------------------------------------------------------------------------------------------------------------------------------------------|
| GOTERM_BP_FAT   | GO:0046364~monosaccharide biosynthetic process | NANE, TDCG, PCK, NANA, NANT, NAGB, MURG, GPMA, NAGA, PGI, NANK, CSRA, PGK                                                                                          |
| GOTERM_BP_FAT   | GO:0046165~alcohol biosynthetic process        | NANE, TDCG, PCK, NANA, NANT, NAGB, MURG, GPMA, NAGA, PGI, NANK, CSRA, PGK                                                                                          |
| SP_PIR_KEYWORDS | gluconeogenesis                                | GPMA, TDCG, PCK, PGI, FBAA, PGK                                                                                                                                    |
| GOTERM_BP_FAT   | GO:0016051~carbohydrate biosynthetic process   | NANE, TDCG, PCK, RFFM, NANA, FTSW, GLGA, NANT, NAGB, NAGA, PGI, NANK, SLT, RFFA, PGK, GLGB, GLGC, MTGA, DACB, GLGP, MURD, LPCA, MURG, GPMA, GMHB, GLGX, GLMM, CSRA |
| GOTERM_BP_FAT   | GO:0006090~pyruvate metabolic process          | GPMA, TDCG, PCK, PGI, ISPH, CSRA, PGK                                                                                                                              |

Annotation Cluster 13 Enrichment Score: 4.235191863088521

| Category        | Term                                 | Genes                                                                                                                                                            |
|-----------------|--------------------------------------|------------------------------------------------------------------------------------------------------------------------------------------------------------------|
| GOTERM_BP_FAT   | GO:0019318~hexose metabolic process  | TDCE, TDCG, PCK, FBAA, GLGA, GALM, YGBJ, PGI, RPIA, FUCU, PGM, PGL, PGK, GLGB, GLGC, FSAB, FUCI, FUCO, GALR, GLGP, FUCP, YBIY, GPMA, GLGX, GLMM, CSRA, GLK, FUCA |
| SP_PIR_KEYWORDS | Isomerase                            | NANE, KDUI, FUCI, DSBA, GALM, LPCA, FKLB, NAGB, PPIA, GPMA, PGI, NANM, GLMM, DEOB, RPIA, FUCU, PGM, TRUA, FRLB                                                   |
| SP_PIR_KEYWORDS | glycolysis                           | GPMA, PGI, FBAA, GLK, PGK                                                                                                                                        |
| INTERPRO        | IPR005952:Phosphoglycerate mutase 1  | GPMA                                                                                                                                                             |
| GOTERM_BP_FAT   | GO:0006006~glucose metabolic process | GLGB, TDCE, GLGC, FSAB, TDCG, PCK, FBAA, GLGP, GLGA, YGBJ, YBIY, GPMA, GLGX, PGI, GLMM, RPIA, PGM, CSRA, GLK, PGL, PGK                                           |

Annotation Cluster 14 Enrichment Score: 4.022734934851986

| Category        | Term              | Genes                                          |
|-----------------|-------------------|------------------------------------------------|
| SP_PIR_KEYWORDS | electron transfer | NRFB, NRFC, NRFA, NAPC, NARH, FDNH, NARG, NARI |

| Enrichment Score:     |                                        |                                                                                                                                                                                                                                                                        |
|-----------------------|----------------------------------------|------------------------------------------------------------------------------------------------------------------------------------------------------------------------------------------------------------------------------------------------------------------------|
| Annotation Cluster 15 | 3.7910514387542076                     |                                                                                                                                                                                                                                                                        |
| Category              | Term                                   | Genes                                                                                                                                                                                                                                                                  |
| SP_PIR_KEYWORDS       | iron                                   | NAPG, NAPH, FDNG, TDCG, NAPF, FDNI, NAPC, FDNH, ISPH, NAPA, NAPB, NRFB, NRFC, ACNB, LUXS, MOAA, KATG, NRFF, NARH, GLTD, FECA, NARG, FECB, FECC, NARI, NRDB, HEMN, GLTB, YGGW, GLCF, NRFA, HYBC, FECE, FECD, HYBB, HYBO, FUCO, FECR, GLPC, NIRB, CYBC, YBIY, YGCO, YFAE |
| SP_PIR_KEYWORDS       | 4fe-4s                                 | GLCF, NAPG, NAPH, FDNG, TDCG, NAPF, HYBO, FDNH, NAPA, GLPC, NIRB, NRFC, ACNB, YBIY, MOAA, NARH, GLTD, NARG, HEMN, YGGW                                                                                                                                                 |
| GOTERM_MF_FAT         | GO:0051536~iron-sulfur cluster binding | NAPG, NAPH, TDCG, FDNG, NAPF, FDNH, NAPA, ISPH, NRFC, ACNB, MOAA, NARH, NARG, GLTD, HEMN, YGGW, GLTB, GLCF, HYBO, GLPC, NIRB, YBIY, NIRD, YGCO, YFAE                                                                                                                   |
| GOTERM_MF_FAT         | GO:0051540~metal cluster binding       | NAPG, NAPH, TDCG, FDNG, NAPF, FDNH, NAPA, ISPH, NRFC, ACNB, MOAA, NARH, NARG, GLTD, HEMN, YGGW, GLTB, GLCF, HYBO, GLPC, NIRB, YBIY, NIRD, YGCO, YFAE                                                                                                                   |
| GOTERM_MF_FAT         | GO:0009055~electron carrier activity   | NAPG, NAPH, FDNG, NAPF, FDNH, NAPA, NDH, YQCA, NRFC, GOR, GLTD, NARG, LLDD, YQJH, YJHC, GLCF, GLPB, AHPF, MDAB, GLPC, NIRB, CYBC, YHHX, NIRD, DIPZ, YGCO, YGJR, YGCN, YFAE                                                                                             |

| Enrichment Score:     |                                    |                                       |
|-----------------------|------------------------------------|---------------------------------------|
| Annotation Cluster 16 | 3.5104327916440012                 |                                       |
| Category              | Term                               | Genes                                 |
| KEGG_PATHWAY          | ecw00030:Pentose phosphate pathway | PGI, FBAA, DEOC, DEOB, RPIA, PGM, PGL |

| Enrichment Score:     |                                       |                                                                                                                                                     |
|-----------------------|---------------------------------------|-----------------------------------------------------------------------------------------------------------------------------------------------------|
| Annotation Cluster 17 | 3.1811470414951293                    |                                                                                                                                                     |
| Category              | Term                                  | Genes                                                                                                                                               |
| SP_PIR_KEYWORDS       | Molybdenum cofactor biosynthesis      | MOAE, MOAD, MOAC, MOAB, MOAA, MOEA                                                                                                                  |
| GOTERM_BP_FAT         | GO:0006732~coenzyme metabolic process | FSAB, MOEA, NAPA, SUCB, MOAE, FOLP, YGBJ, MOAD, MOAC, ACNB, GOR, MOAB, MOAA, GSHA, UBIH, GSHB, RPIA, YFAY, GLTA, UBIF                               |
| GOTERM_BP_FAT         | GO:0051186~cofactor metabolic process | NAPA, MOAE, MOAD, YGBJ, MOAC, GOR, MOAB, ACNB, MOAA, RPIA, HEMN, GLTA, YGGW, FSAB, EUTT, CYSG, MOEA, SUCB, BIOH, FOLP, UBIH, GSHA, GSHB, YFAY, UBIF |

| Enrichment Score:     |                         |                                                                 |
|-----------------------|-------------------------|-----------------------------------------------------------------|
| Annotation Cluster 18 | 2.902722355774302       |                                                                 |
| Category              | Term                    | Genes                                                           |
| SP_PIR_KEYWORDS       | Lysine biosynthesis     | LYSA, DAPB, ASD, DAPE, DAPD                                     |
| SP_PIR_KEYWORDS       | amino-acid biosynthesis | LYSA, DAPB, ARGE, ASD, HISC, THRC, AROD, GLTD, DAPE, DAPD, GLTB |

| Enrichment Score:     |                    |  |
|-----------------------|--------------------|--|
| Annotation Cluster 19 | 2.8725715336880624 |  |

| Category                                                      | Term                                                             | Genes                                                                                                                                                                                                                                                                                                                           |
|---------------------------------------------------------------|------------------------------------------------------------------|---------------------------------------------------------------------------------------------------------------------------------------------------------------------------------------------------------------------------------------------------------------------------------------------------------------------------------|
| KEGG_PATHWAY                                                  | ect00630:Glyoxylate and dicarboxylate metabolism                 | GLCF, ACNB, FDNG, FDNI, FUCO, FDNH, GLTA                                                                                                                                                                                                                                                                                        |
| Enrichment Score:<br>Annotation Cluster 20 2.7467466191310326 |                                                                  |                                                                                                                                                                                                                                                                                                                                 |
| Category                                                      | Term                                                             | Genes                                                                                                                                                                                                                                                                                                                           |
| SP_PIR_KEYWORDS                                               | glycerol metabolism                                              | GLPK, DHAL, DHAK, GLDA, GLPD                                                                                                                                                                                                                                                                                                    |
| GOTERM_BP_FAT                                                 | GO:0006071~glycerol metabolic process                            | GLPK, GLPB, GLPA, GLPF, DHAL, DHAK, GLDA, GLPD, GLPC                                                                                                                                                                                                                                                                            |
| Enrichment Score:<br>Annotation Cluster 21 2.731945431328348  |                                                                  |                                                                                                                                                                                                                                                                                                                                 |
| Category                                                      | Term                                                             | Genes                                                                                                                                                                                                                                                                                                                           |
| GOTERM_BP_FAT                                                 | GO:0006542~glutamine biosynthetic process                        | GLNG, GLNH, GLNQ, GLNA, GLNP, GLNL                                                                                                                                                                                                                                                                                              |
| GOTERM_BP_FAT                                                 | GO:0006541~glutamine metabolic process                           | GLNG, GLNH, GUAA, GLNQ, GLNA, GLNP, YAFJ, GLNL, GLTB                                                                                                                                                                                                                                                                            |
| SP_PIR_KEYWORDS                                               | amino-acid biosynthesis                                          | LYSA, DAPB, ARGE, ASD, HISC, THRC, AROD, GLTD, DAPE, DAPD, GLTB<br>LYSA, TDCC, ASD, THRC, YGIF, NAPA, MOAE, MOAD, MOAC, SGBH, MOAB,<br>MOAA, GLNQ, ZNTA, GLTD, GLNP, GLNL, HEMN, YGGW, GLTB, GLNG, GLNH,<br>EUTT, ARGE, CYSG, GLNA, MOEA, QUEF, DAPE, GLTP, DAPD, DAPB, FOLP, GUAA,<br>BIOH, LYSR, HISC, GMHB, AROD, YFAY, HISJ |
| GOTERM_BP_FAT                                                 | GO:0044271~nitrogen compound biosynthetic process                |                                                                                                                                                                                                                                                                                                                                 |
| Enrichment Score:<br>Annotation Cluster 22 2.7306607420725055 |                                                                  |                                                                                                                                                                                                                                                                                                                                 |
| Category                                                      | Term                                                             | Genes                                                                                                                                                                                                                                                                                                                           |
| GOTERM_BP_FAT                                                 | GO:0015949~nucleobase, nucleoside and nucleotide interconversion | UDP, CPDB, APHA, GUAA, DGT, NUPG, DEOD, CDD, DEOC, DEOB, TSX, DEOA, NRDB                                                                                                                                                                                                                                                        |
| KEGG_PATHWAY                                                  | ect00230:Purine metabolism                                       | NUDF, YFBR, GUAA, PPX, DGT, CPDB, DEOD, DEOB, NRDB                                                                                                                                                                                                                                                                              |
| Enrichment Score:<br>Annotation Cluster 23 2.596674060349352  |                                                                  |                                                                                                                                                                                                                                                                                                                                 |
| Category                                                      | Term                                                             | Genes                                                                                                                                                                                                                                                                                                                           |
| SP_PIR_KEYWORDS                                               | ATP                                                              | GLNG, PCK, PHNC, CLPX, ALAS, CCMA, MURD, MALK, GLNQ, CLPP, HSDR, GSHB, NIKD, NIKE, GLNL, PGK                                                                                                                                                                                                                                    |
| SP_PIR_KEYWORDS                                               | nickel                                                           | HYBF, HYBC, HYBD, NIKD, NIKE, NIKC, HYPA, NIKR, HYPB<br>YCJV, GLNH, FECE, FECD, MALF, PHNC, MALG, PHNE, MALE, CCMA, MALK,<br>GLNQ, XYLH, GLNP, FECB, NIKD, FECC, NIKE, HISJ, NIKC                                                                                                                                               |
| KEGG_PATHWAY                                                  | eck02010:ABC transporters                                        | YCJV, MIAA, PCK, ENVZ, YHBJ, GLPK, MALK, GLNQ, NIKD, NIKE, NANK, PGK,<br>GLNG, MAK, FECE, PHNC, RECB, CLPX, MURD, CCMA, GUAA, HFLB, HSDR,<br>YEEZ, GSHB, EUTP, GLK                                                                                                                                                              |
| UP_SEQ_FEATURE                                                | nucleotide phosphate-binding region:ATP                          |                                                                                                                                                                                                                                                                                                                                 |

| Enrichment Score:     |                                                   |                                   |
|-----------------------|---------------------------------------------------|-----------------------------------|
| Annotation Cluster 24 | 2.5314645033989565                                |                                   |
| Category              | Term                                              | Genes                             |
| KEGG_PATHWAY          | eum00260:Glycine, serine and threonine metabolism | ASD, GCVP, THRC, TDCG, GCVT, TDCB |

| Enrichment Score:     |                                      |                                                                                                                                                                                                                                                                                                                                                                                                                                  |
|-----------------------|--------------------------------------|----------------------------------------------------------------------------------------------------------------------------------------------------------------------------------------------------------------------------------------------------------------------------------------------------------------------------------------------------------------------------------------------------------------------------------|
| Annotation Cluster 25 | 2.4303369051233727                   |                                                                                                                                                                                                                                                                                                                                                                                                                                  |
| Category              | Term                                 | Genes                                                                                                                                                                                                                                                                                                                                                                                                                            |
| SP_PIR_KEYWORDS       | nucleotide-binding                   | YCJV, TDCD, CPDB, PCK, NARX, YHBJ, ALAS, GLPK, ATOS, MALK, ZNTA, HFLX, NIKD, NANK, NIKE, NARL, PGK, GLGC, EUTT, FECE, RECB, CLPX, MURD, ARCB, EVGS, CLPP, HSDR, GSHA, GSHB, EUTP, MIAA, YJIA, DHAL, ENVZ, HYPB, PPK, MOAB, MOAA, GLNQ, FTSZ, GLNL, GLNG, GLNE, YFBR, FUCK, MAK, GLNA, PHNC, CPXA, NADK, MUTL, CCMA, GUAA, HFLB, YEEZ, GLK                                                                                        |
| SP_PIR_KEYWORDS       | atp-binding                          | MIAA, YCJV, TDCD, PCK, DHAL, NARX, ENVZ, YHBJ, ALAS, GLPK, ATOS, PPK, MALK, GLNQ, ZNTA, NIKD, NANK, NIKE, NARL, GLNL, PGK, GLNG, GLGC, EUTT, GLNE, FUCK, MAK, GLNA, FECE, CPXA, PHNC, RECB, NADK, CLPX, MUTL, GUAA, CCMA, MURD, ARCB, HFLB, EVGS, CLPP, HSDR, GSHA, YEEZ, GSHB, EUTP, GLK                                                                                                                                        |
| GOTERM_MF_FAT         | GO:0017076~purine nucleotide binding | YCJV, TDCD, PCK, NARX, YHBJ, ALAS, GLPK, ATOS, GOR, MALK, ZNTA, HFLX, GLTD, NIKD, NIKE, NANK, NARL, PGK, GLGC, EUTT, GLPA, AHPF, FECE, RECB, CLPX, YPDA, MURD, ARCB, EVGS, CLPP, UBIH, HSDR, GSHA, GSHB, EUTP, UBIF, MIAA, YJIA, DHAL, ENVZ, NDH, HYPB, PPK, MOAB, GRPE, MOAA, GLNQ, FTSZ, GLNL, GLNG, GLNE, FUCK, MAK, GLNA, PHNC, CPXA, NADK, NIRB, MUTL, CCMA, GUAA, HFLB, YEEZ, GLK                                          |
| GOTERM_MF_FAT         | GO:0000166~nucleotide binding        | YCJV, LDHA, MAEB, TDCD, CPDB, PCK, NARX, YHBJ, ALAS, GLPK, ATOS, GOR, MALK, ZNTA, HFLX, GLTD, NIKD, NIKE, NANK, NARL, PGK, GLGC, EUTT, GLPA, AHPF, FECE, RECB, YPDA, CLPX, MURD, ARCB, EVGS, CLPP, GSHA, UBIH, HSDR, GSHB, EUTP, UBIF, MIAA, ASD, YJIA, DHAL, ENVZ, NDH, HYPB, YQCA, PPK, MOAB, GRPE, MOAA, GLNQ, FTSZ, LLDD, GLNL, GLNG, GLNE, YFBR, FUCK, MAK, GLNA, PHNC, CPXA, NADK, MUTL, NIRB, CCMA, GUAA, HFLB, YEEZ, GLK |

| Enrichment Score:     |                                  |                                                                                                         |
|-----------------------|----------------------------------|---------------------------------------------------------------------------------------------------------|
| Annotation Cluster 26 | 2.4223054797333674               |                                                                                                         |
| Category              | Term                             | Genes                                                                                                   |
| SP_PIR_KEYWORDS       | magnesium                        | GUDX, MIAA, PPX, MOEA, GLPF, APHA, NUDF, DGT, GUDD, ZNTA, ISPB, PTSA, GLMM, GSHB, YFAW, PGM, YBJI, PTRA |
| GOTERM_MF_FAT         | GO:0000287~magnesium ion binding | GUDX, MIAA, PPX, MOEA, GLPF, APHA, NUDF, DGT, GUDD, ZNTA, PTSA, GSHB, GLMM, DEOB, YFAW, PGM, YBJI, PTRA |
| UP_SEQ_FEATURE        | metal ion-binding site:Magnesium | GUDX, GUDD, ZNTA, GLPF, PTSA, GLMM, APHA, YFAW, PGM, YBJI                                               |

| Enrichment Score:     |                    |       |
|-----------------------|--------------------|-------|
| Annotation Cluster 27 | 2.3937104636277664 |       |
| Category              | Term               | Genes |

|               |                                            |                                          |
|---------------|--------------------------------------------|------------------------------------------|
| GOTERM_BP_FAT | GO:0009410~response to xenobiotic stimulus | KATG, ZNTA, AHPF, CPXA, CPXR, SODA, YFGD |
| GOTERM_BP_FAT | GO:0006805~xenobiotic metabolic process    | KATG, ZNTA, AHPF, CPXA, CPXR, SODA, YFGD |
| GOTERM_MF_FAT | GO:0016209~antioxidant activity            | GOR, KATG, AHPF, SODA                    |

|                       |                                                                  |                                                                          |
|-----------------------|------------------------------------------------------------------|--------------------------------------------------------------------------|
| Enrichment Score:     |                                                                  |                                                                          |
| Annotation Cluster 28 | 2.291653622013819                                                |                                                                          |
| Category              | Term                                                             | Genes                                                                    |
| GOTERM_BP_FAT         | GO:0015949~nucleobase, nucleoside and nucleotide interconversion | UDP, CPDB, APHA, GUAA, DGT, NUPG, DEOD, CDD, DEOC, DEOB, TSX, DEOA, NRDB |
| KEGG_PATHWAY          | ecd00240:Pyrimidine metabolism                                   | UDP, YFBR, CPDB, DEOD, CDD, DEOA, NRDB                                   |

|                       |                              |                                         |
|-----------------------|------------------------------|-----------------------------------------|
| Enrichment Score:     |                              |                                         |
| Annotation Cluster 29 | 2.2302500165299324           |                                         |
| Category              | Term                         | Genes                                   |
| KEGG_PATHWAY          | ecd00620:Pyruvate metabolism | TDCE, MAEB, LDHA, MGSA, PCK, FUCO, LLDD |

|                       |                                 |                                                                  |
|-----------------------|---------------------------------|------------------------------------------------------------------|
| Enrichment Score:     |                                 |                                                                  |
| Annotation Cluster 30 | 2.1564085686536174              |                                                                  |
| Category              | Term                            | Genes                                                            |
| SP_PIR_KEYWORDS       | heme                            | NIRB, NRFB, NRFA, CYBC, KATG, NRFF, HYBB, NAPC, FDNI, NAPB, NARI |
| SP_PIR_KEYWORDS       | chromoprotein                   | NRFB, NRFA, KATG, NAPC, NARI                                     |
| INTERPRO              | IPR011031:Multihaem cytochrome  | NRFB, NRFA, NAPC, NAPB                                           |
| GOTERM_MF_FAT         | GO:0046906~tetrapyrrole binding | NIRB, NRFA, CYBC, KATG, NAPC                                     |

|                       |                                          |                                    |
|-----------------------|------------------------------------------|------------------------------------|
| Enrichment Score:     |                                          |                                    |
| Annotation Cluster 31 | 2.075966135949771                        |                                    |
| Category              | Term                                     | Genes                              |
| SP_PIR_KEYWORDS       | Fucose metabolism                        | FUCK, FUCI, FUCO, FUCU, FUCP, FUCA |
| GOTERM_BP_FAT         | GO:0006004~fucose metabolic process      | FUCK, FUCI, FUCO, FUCU, FUCP, FUCA |
| KEGG_PATHWAY          | ecd00051:Fructose and mannose metabolism | FUCK, MAK, FUCI, FBAA, YFAW, FUCA  |

|                       |                                 |                                                                                                |
|-----------------------|---------------------------------|------------------------------------------------------------------------------------------------|
| Enrichment Score:     |                                 |                                                                                                |
| Annotation Cluster 32 | 1.9858242210851904              |                                                                                                |
| Category              | Term                            | Genes                                                                                          |
| SP_PIR_KEYWORDS       | phosphohistidine                | ATOS, NPR, ARCB, GPMA, CPXA, NARX, ENVZ, GLNL                                                  |
| SP_PIR_KEYWORDS       | phosphotransferase              | GLPK, ATOS, TDCD, PTSN, ARCB, CPXA, NARX, ENVZ, GLK, GLNL, PGK                                 |
| SP_PIR_KEYWORDS       | two-component regulatory system | GLNG, EVGA, CPXA, NARX, ENVZ, YPDB, ATOS, ARCB, EVGS, BAER, QSEB, CPXR, OMPR, NARL, BASR, GLNL |
| SP_PIR_KEYWORDS       | autophosphorylation             | ATOS, ARCB, CPXA, NARX, ENVZ, GLNL                                                             |



|                 |                                           |                                                                                                                                           |
|-----------------|-------------------------------------------|-------------------------------------------------------------------------------------------------------------------------------------------|
| SP_PIR_KEYWORDS | kinase                                    | TDCD, FUCK, MAK, RDOA, CPXA, DHAL, DHAK, NARX, NADK, YEII, ENVZ, YPDA, GLPK, ATOS, PPK, NPR, ARCB, PTSN, EVGS, PTSA, NANK, GLNL, GLK, PGK |
| SMART           | SM00387:HATPase_c                         | MUTL, ATOS, ARCB, EVGS, CPXA, NARX, ENVZ, GLNL, YPDA                                                                                      |
| SMART           | SM00388:HisKA                             | ATOS, ARCB, EVGS, CPXA, NARX, ENVZ, GLNL                                                                                                  |
| INTERPRO        | IPR003594:ATP-binding region, ATPase-like | MUTL, ATOS, ARCB, EVGS, CPXA, NARX, ENVZ, GLNL, YPDA                                                                                      |

Annotation Cluster 33 Enrichment Score: 1.98318521499125

| Category        | Term                        | Genes                                                                                                         |
|-----------------|-----------------------------|---------------------------------------------------------------------------------------------------------------|
| SP_PIR_KEYWORDS | Flavoprotein                | GLPB, GLPA, AHPF, GLPD, MDAB, NDH, YQCA, NIRB, GOR, UBIH, LLDD, GLTB, UBIF, YGCN                              |
| SP_PIR_KEYWORDS | FAD                         | NIRB, GOR, GLPA, AHPF, UBIH, GLPD, NDH, UBIF, GLTB, YGCN                                                      |
| GOTERM_MF_FAT   | GO:0050662~coenzyme binding | LDHA, MAEB, ASD, GLPA, AHPF, MDAB, GCVH, NDH, YFCH, YQCA, SUCB, NIRB, YGBJ, GOR, GLTD, UBIH, YEEZ, LLDD, UBIF |

Enrichment Score:

Annotation Cluster 34 1.8558134030136189

| Category       | Term                                     | Genes                                         |
|----------------|------------------------------------------|-----------------------------------------------|
| UP_SEQ_FEATURE | nucleotide phosphate-binding region:NADP | MAEB, YAJO, DKGA, IDNO, TAS, YQHD, YDHF, YHDH |

Enrichment Score:

Annotation Cluster 35 1.7977954534369145

| Category      | Term                                    | Genes                                                |
|---------------|-----------------------------------------|------------------------------------------------------|
| GOTERM_BP_FAT | GO:0006071~glycerol metabolic process   | GLPK, GLPB, GLPA, GLPF, DHAL, DHAK, GLDA, GLPD, GLPC |
| KEGG_PATHWAY  | ecg00564:Glycerophospholipid metabolism | GLPB, GLPA, GLPD, GLPC                               |

Enrichment Score:

Annotation Cluster 36 1.7302510491041339

| Category      | Term                                | Genes                                  |
|---------------|-------------------------------------|----------------------------------------|
| KEGG_PATHWAY  | eum00480:Glutathione metabolism     | PEPD, GOR, GSHA, GSHB                  |
| GOTERM_BP_FAT | GO:0006790~sulfur metabolic process | BIOH, MOAD, ASD, GOR, GSHA, SSEA, GSHB |

Enrichment Score:

Annotation Cluster 37 1.6563975505401778

| Category        | Term           | Genes                                                                                         |
|-----------------|----------------|-----------------------------------------------------------------------------------------------|
| SP_PIR_KEYWORDS | ion transport  | NANC, FECE, YIDK, FECD, FECR, OMPC, YFEO, YJCE, ZUPT, LAMB, FECA, FECB, FECC, TSX, CLCA, KEFB |
| SP_PIR_KEYWORDS | iron transport | FECE, FECD, FECA, FECR, FECB, FECC                                                            |

|                       |                            |                                                |
|-----------------------|----------------------------|------------------------------------------------|
| Enrichment Score:     |                            |                                                |
| Annotation Cluster 38 | 1.6376679556962557         |                                                |
| Category              | Term                       | Genes                                          |
| INTERPRO              | IPR012335:Thioredoxin fold | ARSC, YGHU, AHPF, YBBN, DIPZ, DSBA, YFFB, YFGD |

|                       |                                                          |                                                                                                                             |
|-----------------------|----------------------------------------------------------|-----------------------------------------------------------------------------------------------------------------------------|
| Enrichment Score:     |                                                          |                                                                                                                             |
| Annotation Cluster 39 | 1.533374935154952                                        |                                                                                                                             |
| Category              | Term                                                     | Genes                                                                                                                       |
| SP_PIR_KEYWORDS       | cell wall biogenesis/degradation                         | FTSW, MURD, MTGA, MURG, AMPD, DACB, SLT                                                                                     |
| SP_PIR_KEYWORDS       | cell shape                                               | FTSW, MURD, YFGA, MTGA, MURG, DACB                                                                                          |
| GOTERM_BP_FAT         | GO:0005976~polysaccharide metabolic process              | GLGB, GLGC, MTGA, KDUI, RFFM, AMPD, DACB, GLGP, FTSW, GLGA, MURD, LPCA, MURG, GMHB, GLGX, GLMM, MALS, SLT, MALQ, RFFA, MALP |
| GOTERM_BP_FAT         | GO:0007047~cell wall organization                        | FTSW, MURD, MTGA, MURG, AMPD, DACB, SLT, YPDA                                                                               |
| GOTERM_BP_FAT         | GO:0051301~cell division                                 | FTSW, MURD, HFLB, MURG, FTSZ, DACB                                                                                          |
| GOTERM_BP_FAT         | GO:0045229~external encapsulating structure organization | FTSW, MURD, MTGA, MURG, AMPD, DACB, SLT, YPDA                                                                               |

|                       |                     |                                   |
|-----------------------|---------------------|-----------------------------------|
| Enrichment Score:     |                     |                                   |
| Annotation Cluster 40 | 1.5315464238170997  |                                   |
| Category              | Term                | Genes                             |
| SP_PIR_KEYWORDS       | carbon-carbon lyase | LYSA, PCK, UBIX, FBAA, NANA, GLTA |

|                       |                                   |                        |
|-----------------------|-----------------------------------|------------------------|
| Enrichment Score:     |                                   |                        |
| Annotation Cluster 41 | 1.4684917999045133                |                        |
| Category              | Term                              | Genes                  |
| KEGG_PATHWAY          | ecv03440:Homologous recombination | DNAT, RECB, PRIC, RECR |

|                       |                               |                                                                                                                        |
|-----------------------|-------------------------------|------------------------------------------------------------------------------------------------------------------------|
| Enrichment Score:     |                               |                                                                                                                        |
| Annotation Cluster 42 | 1.3745912320160147            |                                                                                                                        |
| Category              | Term                          | Genes                                                                                                                  |
| SP_PIR_KEYWORDS       | Protease                      | PEPD, GSPO, PMBA, HYBD, TESA, HFLC, HFLB, HFLX, CLPP, BCSE, YBEY, HFLK, YFGC, IADA, PEPP, PTRA                         |
| GOTERM_MF_FAT         | GO:0008233~peptidase activity | ARGE, PEPD, CPDA, GSPO, PMBA, HYBD, DAPE, DACB, TESA, HFLC, HFLB, BCSE, CLPP, HFLX, YBEY, HFLK, YFGC, IADA, PEPP, PTRA |

|                       |                                             |                       |
|-----------------------|---------------------------------------------|-----------------------|
| Enrichment Score:     |                                             |                       |
| Annotation Cluster 43 | 1.3596916673585608                          |                       |
| Category              | Term                                        | Genes                 |
| KEGG_PATHWAY          | eck00270:Cysteine and methionine metabolism | ASD, LUXS, TDCG, SSEA |

|                       |                   |       |
|-----------------------|-------------------|-------|
| Enrichment Score:     |                   |       |
| Annotation Cluster 44 | 1.336106875978563 |       |
| Category              | Term              | Genes |

|               |                                                     |                                                     |
|---------------|-----------------------------------------------------|-----------------------------------------------------|
| GOTERM_BP_FAT | GO:0015768~maltose transport                        | MALK, LAMB, MALE                                    |
| GOTERM_BP_FAT | GO:0042946~glucoside transport                      | MALK, LAMB, MALE                                    |
| GOTERM_BP_FAT | GO:0015766~disaccharide transport                   | MALK, LAMB, MALE                                    |
| GOTERM_MF_FAT | GO:0051119~sugar transmembrane transporter activity | YCJV, NANT, XYLE, NPR, MALK, PTSN, LAMB, PTSA, MALE |
