# Supplementary material for: Central role for RNase YbeY in Hfq-dependent and Hfq-independent small-RNA regulation in bacteria
Source: PubMed Central journal article supplement (PMC3933206; doi:10.1186/1471-2164-15-121), 2014-02-11
Supplement: 1471-2164-15-121-S6.pdf [file 1471-2164-15-121-S6.pdf]

**Supplemental Table 6. Functional clusters of genes differentially up-regulated in *ΔybeY* vs. WT under HU**

| Enrichment Score:    |                                         |                                                                                                                                                                                                                                                                                                                                                                                                                                                                                                                                                                                                                                                                                                                                                                                                                                         |
|----------------------|-----------------------------------------|-----------------------------------------------------------------------------------------------------------------------------------------------------------------------------------------------------------------------------------------------------------------------------------------------------------------------------------------------------------------------------------------------------------------------------------------------------------------------------------------------------------------------------------------------------------------------------------------------------------------------------------------------------------------------------------------------------------------------------------------------------------------------------------------------------------------------------------------|
| Annotation Cluster 1 | 22.558010037413176                      |                                                                                                                                                                                                                                                                                                                                                                                                                                                                                                                                                                                                                                                                                                                                                                                                                                         |
| Category             | Term                                    | Genes                                                                                                                                                                                                                                                                                                                                                                                                                                                                                                                                                                                                                                                                                                                                                                                                                                   |
|                      |                                         | YABI, GUDP, YFIN, NANC, YOHD, YEER, YCJP, YOHO, YNHF, NANT, WZA, SMPA, EAMA, YPHD, EAMB, YFIB, MRCA, SETB, YQHA, PHOQ, YGBN, YFHM, YFHK, HYBC, YGDD, GNTU, ATPI, NUOH, RHTC, YEDI, YGDL, YHHQ, YEDA, DLD, YGCS, CSTA, YJFL, WECH, YFGO, YEGT, YQJA, NAGE, COBS, FRUA, YNFE, YNFF, YNFH, TATE, YLAC, YFGA, YEGH, LLDL, KGTP, YFGH, YDEE, YJHB, EMRD, YDEA, WZC, YCAD, YTFL, YFEZ, YAHG, YGFQ, YCAP, FLU, MDTP, YIHN, YGIH, ARSB, YIHO, NARQ, YEIB, YHBE, HOKE, YEAN, YEIH, YQEG, YFEO, PRC, MGTA, PROP, DINF, CDSA, YBGH, NLPD, YIGG, MDLB, GSPK, YNEN, CLD, TYRP, RSTB, XYLH, YDGC, AMID, YBGT, YRAJ, RTN, APBE, YFCJ, YRAQ, YNJF, YJEH, IDNT, YFCA, NFRA, YRBG, YDHJ, YFBV, DMSC, MACA, YQFA, MLTF, SHIA, YEBQ, YBAL, YEBN, YEBS, DACD, YEJM, ZNUB, SDHA, ZNUC, SDHC, SDHD, YIDX, MLTA, MLTB, CYST, MLTD, POTB, YFAV, FTSB, POTA, TISB |
| SP_PIR_KEYWORDS      | membrane                                |                                                                                                                                                                                                                                                                                                                                                                                                                                                                                                                                                                                                                                                                                                                                                                                                                                         |
| Enrichment Score:    |                                         |                                                                                                                                                                                                                                                                                                                                                                                                                                                                                                                                                                                                                                                                                                                                                                                                                                         |
| Annotation Cluster 2 | 5.481608124094565                       |                                                                                                                                                                                                                                                                                                                                                                                                                                                                                                                                                                                                                                                                                                                                                                                                                                         |
| Category             | Term                                    | Genes                                                                                                                                                                                                                                                                                                                                                                                                                                                                                                                                                                                                                                                                                                                                                                                                                                   |
| KEGG_PATHWAY         | ecq02020:Two-component system           | RCSA, ATOB, NARP, YFHK, NARQ, PHOB, ARCA, RSTA, RSTB, YFHA, UHPA, PHOQ, FLHC, CSRA, FLHD                                                                                                                                                                                                                                                                                                                                                                                                                                                                                                                                                                                                                                                                                                                                                |
| SP_PIR_KEYWORDS      | phosphoprotein                          | RPSA, NARP, NARQ, YFHK, PHOB, PPHA, NAGE, WZC, ARCA, FRUA, RSTA, INFC, RSTB, YFHA, UHPA, MGTA, UGD, PHOQ                                                                                                                                                                                                                                                                                                                                                                                                                                                                                                                                                                                                                                                                                                                                |
| Enrichment Score:    |                                         |                                                                                                                                                                                                                                                                                                                                                                                                                                                                                                                                                                                                                                                                                                                                                                                                                                         |
| Annotation Cluster 3 | 5.166545127942868                       |                                                                                                                                                                                                                                                                                                                                                                                                                                                                                                                                                                                                                                                                                                                                                                                                                                         |
| Category             | Term                                    | Genes                                                                                                                                                                                                                                                                                                                                                                                                                                                                                                                                                                                                                                                                                                                                                                                                                                   |
| SP_PIR_KEYWORDS      | P-loop                                  | GARK, UVRD, COBU, SRMB, MDLB, UUP, BISC, REP, OBGE, ZNUC, NFRA, RNE, YRBF, POTA, SBCC, GMK                                                                                                                                                                                                                                                                                                                                                                                                                                                                                                                                                                                                                                                                                                                                              |
| UP_SEQ_FEATURE       | nucleotide phosphate-binding region:ATP | COAE, UVRD, COBU, CMK, SRMB, MDLB, YGGC, REP, DHAR, ZNUC, PYRH, YFHA, PHOQ, RECQ, YEHX, YGFQ, NANK, YRBF, POTA, SBCC, GMK                                                                                                                                                                                                                                                                                                                                                                                                                                                                                                                                                                                                                                                                                                               |
| Enrichment Score:    |                                         |                                                                                                                                                                                                                                                                                                                                                                                                                                                                                                                                                                                                                                                                                                                                                                                                                                         |
| Annotation Cluster 4 | 4.076973525915364                       |                                                                                                                                                                                                                                                                                                                                                                                                                                                                                                                                                                                                                                                                                                                                                                                                                                         |
| Category             | Term                                    | Genes                                                                                                                                                                                                                                                                                                                                                                                                                                                                                                                                                                                                                                                                                                                                                                                                                                   |
| SP_PIR_KEYWORDS      | metal-binding                           | GUDX, TYNA, EFEB, PPHA, YDHY, YNFE, YNFF, YEIH, YNFG, ALAS, MSRB, RLMN, SPEA, GUDD, BFR, HEMF, YPHC, MGTA, PHOQ, NANK, AEGA, YFGC, YGBM, PFLC, NORV, HEMN, YFHL, HYBC, GARL, PTSP, FTNA, HYFI, GUAD, DAPE, YAGT, YEAX, SDHC, SDHD, LIGA, HCAC, AMID, ALKB, YGFT, YFAU                                                                                                                                                                                                                                                                                                                                                                                                                                                                                                                                                                   |
| SP_PIR_KEYWORDS      | iron                                    | EFEB, PPHA, YDHY, YNFE, YNFF, YNFG, RLMN, YIAY, BFR, AEGA, PFLC, HEMN, NORV, YFHL, HYBC, GARL, FTNA, HYFI, YAGT, YEAX, SDHC, SDHD, HCAC, ALKB, YGFT                                                                                                                                                                                                                                                                                                                                                                                                                                                                                                                                                                                                                                                                                     |

|                      |                                                                                                                                                                                                       |                                                                                                                                                                          |
|----------------------|-------------------------------------------------------------------------------------------------------------------------------------------------------------------------------------------------------|--------------------------------------------------------------------------------------------------------------------------------------------------------------------------|
|                      | Enrichment Score:                                                                                                                                                                                     |                                                                                                                                                                          |
| Annotation Cluster 5 | 3.681573654246584                                                                                                                                                                                     |                                                                                                                                                                          |
| Category             | Term                                                                                                                                                                                                  | Genes                                                                                                                                                                    |
| SP_PIR_KEYWORDS      | dna repair                                                                                                                                                                                            | MUG, UVRD, LEXA, YEIH, MUTH, REP, PHR, LIGA, MUTT, RECQ, CHO, ALKB, SBCC                                                                                                 |
| SP_PIR_KEYWORDS      | dna replication                                                                                                                                                                                       | REP, SBCD, GSPB, UVRD, LIGA, LEXA, MUTT, SBCC                                                                                                                            |
|                      | Enrichment Score:                                                                                                                                                                                     |                                                                                                                                                                          |
| Annotation Cluster 6 | 3.66002232739701                                                                                                                                                                                      |                                                                                                                                                                          |
| Category             | Term                                                                                                                                                                                                  | Genes                                                                                                                                                                    |
| KEGG_PATHWAY         | ecd00360:Phenylalanine metabolism                                                                                                                                                                     | TYNA, FEAB, HCAF, HCAC, HCAB, HCAD                                                                                                                                       |
|                      | GO:0016708~oxidoreductase activity, acting on paired donors, with incorporation or reduction of molecular oxygen, NADH or NADPH as one donor, and incorporation of two atoms of oxygen into one donor |                                                                                                                                                                          |
| GOTERM_MF_FAT        |                                                                                                                                                                                                       | HCAF, HCAC, HCAD                                                                                                                                                         |
|                      | GO:0019439~aromatic compound catabolic process                                                                                                                                                        |                                                                                                                                                                          |
| GOTERM_BP_FAT        |                                                                                                                                                                                                       | HCAF, HCAC, HCAB, HCAD                                                                                                                                                   |
|                      | Enrichment Score:                                                                                                                                                                                     |                                                                                                                                                                          |
| Annotation Cluster 7 | 3.6069836511677815                                                                                                                                                                                    |                                                                                                                                                                          |
| Category             | Term                                                                                                                                                                                                  | Genes                                                                                                                                                                    |
| SP_PIR_KEYWORDS      | dna repair                                                                                                                                                                                            | MUG, UVRD, LEXA, YEIH, MUTH, REP, PHR, LIGA, MUTT, RECQ, CHO, ALKB, SBCC                                                                                                 |
| SP_PIR_KEYWORDS      | DNA damage                                                                                                                                                                                            | MUG, UVRD, PHR, LIGA, LEXA, MUTT, RECQ, CHO, ALKB, YEIH, MUTH                                                                                                            |
|                      | GO:0006281~DNA repair                                                                                                                                                                                 |                                                                                                                                                                          |
| GOTERM_BP_FAT        |                                                                                                                                                                                                       | MUG, UVRD, YEES, LEXA, YEIH, RECE, THRL, YEDI, MUTH, REP, PHR, LIGA, MUTT, RECQ, CHO, ALKB, DINJ, DINF                                                                   |
|                      | GO:0033554~cellular response to stress                                                                                                                                                                |                                                                                                                                                                          |
| GOTERM_BP_FAT        |                                                                                                                                                                                                       | MUG, UVRD, YEES, LEXA, YEIH, RECE, THRL, YEDI, MUTH, REP, PHR, LIGA, MUTT, RECQ, CHO, CSTA, ALKB, DINJ, DINF                                                             |
|                      | GO:0006259~DNA metabolic process                                                                                                                                                                      |                                                                                                                                                                          |
| GOTERM_BP_FAT        |                                                                                                                                                                                                       | YEES, INTD, YEIH, THRL, MUTH, REP, GSPB, INSO, RECQ, CHO, YRDD, DINF, SBCD, XSEA, MUG, YFDO, UVRD, LEXA, RECE, YEDI, LIGA, PHR, MUTT, REND, INTR, TORI, ALKB, DINJ, SBCC |
|                      | Enrichment Score:                                                                                                                                                                                     |                                                                                                                                                                          |
| Annotation Cluster 8 | 3.56884019745853                                                                                                                                                                                      |                                                                                                                                                                          |

| Category             | Term                                         | Genes                                                                                                                                                                                                                                                                                                                                                                                 |
|----------------------|----------------------------------------------|---------------------------------------------------------------------------------------------------------------------------------------------------------------------------------------------------------------------------------------------------------------------------------------------------------------------------------------------------------------------------------------|
| SP_PIR_KEYWORDS      | DNA binding                                  | RCSA, NARP, YIAJ, CHPS, UVRD, PHOB, LEXA, CYSB, GALR, CSPF, ENVY, ARCA, RSTA, REP, YCAN, RPOS, PHR, CHPB, FLHC, MARR, ASCG, FLHD                                                                                                                                                                                                                                                      |
| SP_PIR_KEYWORDS      | activator                                    | RCSA, NARP, AAER, GCVA, PHOB, CSPF, ENVY, CYSB, ARCA, DHAR, UHPA, YDEO, XAPR, FLHC, EUTR, FLHD                                                                                                                                                                                                                                                                                        |
| SP_PIR_KEYWORDS      | dna-binding                                  | NARP, CHPS, CDAR, PHOB, CSPF, YEAM, YGBI, YFIE, RECQ, FLHC, XAPR, FLHD, RCSA, AAER, UVRD, LEXA, ARCA, GATR, RSTA, XYLH, YFHA, CHPB, EUTR, YFHH, ASCG, YEGW, ENVY, YGGD, REP, OBGE, DHAR, YJIR, UHPA, RPOS, RCNR, MARR, MUG, YIAJ, GCVA, YBAO, IDNR, CYSB, GALR, YHAJ, YGFI, YCAN, PHR, TORI, YDEO                                                                                     |
| SP_PIR_KEYWORDS      | Transcription                                | NARP, YEGW, CDAR, PHOB, ENVY, CSPF, YEAM, YGBI, DHAR, UHPA, YJIR, RPOS, YFIE, XAPR, FLHC, RCNR, RPOZ, MARR, FLHD, RCSA, YIAJ, AAER, GCVA, YBAO, LEXA, IDNR, CYSB, GALR, ARCA, GATR, YHAJ, RSTA, YGFI, YCAN, YFHA, TORI, PCNB, YDEO, EUTR, YFHH, ASCG                                                                                                                                  |
| SP_PIR_KEYWORDS      | transcription regulation                     | NARP, YEGW, CDAR, PHOB, ENVY, CSPF, YEAM, YGBI, DHAR, UHPA, YJIR, RPOS, YFIE, XAPR, FLHC, RCNR, MARR, FLHD, RCSA, YIAJ, AAER, GCVA, YBAO, LEXA, IDNR, CYSB, GALR, ARCA, GATR, YHAJ, RSTA, YGFI, YCAN, YFHA, TORI, YDEO, MLTD, EUTR, YFHH, ASCG                                                                                                                                        |
| INTERPRO             | IPR011991:Winged helix repressor DNA-binding | RCSA, NARP, YEGW, AAER, GCVA, YBAO, PHOB, LEXA, CYSB, YHAJ, YQEH, RSTA, REP, YGFI, YCAN, UHPA, YJIR, RPOS, YFIE, XAPR, MARR                                                                                                                                                                                                                                                           |
| GOTERM_BP_FAT        | GO:0006350~transcription                     | NARP, YEGW, CDAR, PHOB, ENVY, CSPF, YEAM, YGBI, DHAR, UHPA, YJIR, RPOS, YFIE, XAPR, FLHC, RCNR, RPOZ, MARR, FLHD, RCSA, YIAJ, AAER, GCVA, YBAO, LEXA, IDNR, CYSB, GALR, ARCA, GATR, YHAJ, RSTA, YGFI, YCAN, YFHA, TORI, PCNB, YDEO, MLTD, EUTR, YFHH, ASCG                                                                                                                            |
| GOTERM_BP_FAT        | GO:0045449~regulation of transcription       | NARP, YEGW, CDAR, PHOB, ENVY, CSPF, YEAM, THRL, YQEH, YGBI, DHAR, UHPA, YJIR, RPOS, YFIE, XAPR, FLHC, RCNR, MARR, FLHD, RCSA, YIAJ, AAER, GCVA, YBAO, LEXA, IDNR, CYSB, GALR, ARCA, GATR, YHAJ, RSTA, YGFI, YCAN, YFHA, TORI, YDEO, EUTR, YFHH, ASCG                                                                                                                                  |
| GOTERM_MF_FAT        | GO:0003677~DNA binding                       | NARP, CDAR, CHPS, PHOB, CSPF, YEIH, INTD, YEAM, YQEH, YGBI, INSO, YFIE, RECQ, YRDD, XAPR, FLHC, FLHD, RCSA, AAER, UVRD, LEXA, ARCA, YEDI, GATR, RSTA, YFHA, XYLH, LIGA, INTR, CHPB, EUTR, YFHH, ASCG, YRAN, YEGW, ENVY, YGGD, MUTH, REP, OBGE, YFGA, DHAR, UHPA, YJIR, RPOS, RPOZ, RCNR, MARR, YIAJ, MUG, GCVA, YBAO, IDNR, GALR, YEJH, CYSB, YHAJ, YGFI, YCAN, PHR, REND, TORI, YDEO |
| Annotation Cluster 9 | Enrichment Score: 3.4583647369026926         |                                                                                                                                                                                                                                                                                                                                                                                       |
| Category             | Term                                         | Genes                                                                                                                                                                                                                                                                                                                                                                                 |
| SP_PIR_KEYWORDS      | leader peptide                               | IVBL, ILVL, THRL, HISL                                                                                                                                                                                                                                                                                                                                                                |
| GOTERM_BP_FAT        | GO:0009088~threonine biosynthetic process    | RHTC, THRL                                                                                                                                                                                                                                                                                                                                                                            |
| SP_PIR_KEYWORDS      | amino-acid biosynthesis                      | IVBL, ILVL, AROE, CYSB, DAPE, THRL, HISL                                                                                                                                                                                                                                                                                                                                              |

|               |                                                             |                        |
|---------------|-------------------------------------------------------------|------------------------|
|               | GO:0009067~aspartate family amino acid biosynthetic process | CADA, RHTC, DAPE, THRL |
| GOTERM_BP_FAT |                                                             |                        |

|                                                              |                                                   |                                                                                                                                                                                         |
|--------------------------------------------------------------|---------------------------------------------------|-----------------------------------------------------------------------------------------------------------------------------------------------------------------------------------------|
| Enrichment Score:<br>Annotation Cluster 10 2.593006103656498 |                                                   |                                                                                                                                                                                         |
| Category                                                     | Term                                              | Genes                                                                                                                                                                                   |
| GOTERM_BP_FAT                                                | GO:0009309~amine biosynthetic process             | IVBL, CADA, ILVL, CYSB, RHTC, DAPE, YBCF, TYRP, THRL, SPEC, PYRH, SPEA, AROE, PROP, AEGA, POTB, POTA, YGFT, HISL                                                                        |
| GOTERM_BP_FAT                                                | GO:0044271~nitrogen compound biosynthetic process | YAFE, CADA, ILVL, COBU, APBE, COBS, THRL, BISC, SPEC, SPEA, HEMF, MGTA, PROP, AEGA, HEMN, GMK, FEAB, IVBL, ATP1, CYSB, RHTC, DAPE, TYRP, YBCF, YAGT, PYRH, AROE, POTB, POTA, HISL, YGFT |
| GOTERM_BP_FAT                                                | GO:0046394~carboxylic acid biosynthetic process   | YAFE, IVBL, SHIA, CADA, ILVL, CYSB, RHTC, DAPE, YBCF, TYRP, THRL, BISC, PYRH, AROE, PROP, AEGA, YGFT, HISL                                                                              |

|                                                               |                                 |                                                                                                                                             |
|---------------------------------------------------------------|---------------------------------|---------------------------------------------------------------------------------------------------------------------------------------------|
| Enrichment Score:<br>Annotation Cluster 11 2.4306200666268634 |                                 |                                                                                                                                             |
| Category                                                      | Term                            | Genes                                                                                                                                       |
| SP_PIR_KEYWORDS                                               | nad                             | FEAB, HCAF, GARR, NUOH, YEAX, GHRA, YGBJ, YIAY, UGD, DLD, LIGA, AROE, HCAB, GLXR, HCAD, NORW, NUDC, FADJ, EPD                               |
| INTERPRO                                                      | IPR016040:NAD(P)-binding domain | YJHC, YBJT, GARR, YBAL, YGFF, YGDL, GHRA, YGBJ, FOLM, UGD, AROE, HCAB, GLXR, AEGA, EPD, FADJ, YGFT                                          |
| GOTERM_MF_FAT                                                 | GO:0048037~cofactor binding     | TYNA, CADA, YGCU, YBJT, GARR, HYFI, NUOH, SDHA, SPEC, GHRA, YGBJ, YJIR, UGD, DLD, AROE, GLXR, YFDZ, HCAD, AEGA, NORW, NORV, EPD, FADJ, YGFT |

|                                                              |                                                     |                              |
|--------------------------------------------------------------|-----------------------------------------------------|------------------------------|
| Enrichment Score:<br>Annotation Cluster 12 2.299408202652713 |                                                     |                              |
| Category                                                     | Term                                                | Genes                        |
| KEGG_PATHWAY                                                 | ecj00071:Fatty acid metabolism                      | ATOB, YIAY, HCAD, FADJ, FADI |
| KEGG_PATHWAY                                                 | eum00280:Valine, leucine and isoleucine degradation | ATOB, FADJ, FADI             |

|                                                               |                                                |                                    |
|---------------------------------------------------------------|------------------------------------------------|------------------------------------|
| Enrichment Score:<br>Annotation Cluster 13 2.2973457044037477 |                                                |                                    |
| Category                                                      | Term                                           | Genes                              |
| KEGG_PATHWAY                                                  | eum00632:Benzoate degradation via CoA ligation | SDHA, ATOB, SDHC, SDHD, YCCX, FADJ |

|                       |                                                          |                                                                                                                  |
|-----------------------|----------------------------------------------------------|------------------------------------------------------------------------------------------------------------------|
| SP_PIR_KEYWORDS       | electron transport                                       | SDHA, YEAX, SDHC, SDHD, HCAC, YGCR, YNFG, NORV                                                                   |
| KEGG_PATHWAY          | ecd00190:Oxidative phosphorylation                       | SDHA, SDHC, SDHD, NUOH                                                                                           |
| KEGG_PATHWAY          | ecd00020:Citrate cycle (TCA cycle)                       | SDHA, SDHC, SDHD                                                                                                 |
| KEGG_PATHWAY          | ecy00190:Oxidative phosphorylation                       | SDHA, SDHC, SDHD                                                                                                 |
| GOTERM_BP_FAT         | GO:0009060~aerobic respiration                           | SDHA, SDHC, DLD, SDHD, NUOH                                                                                      |
| GOTERM_BP_FAT         | GO:0006084~acetyl-CoA metabolic process                  | SDHA, SDHC, SDHD, SCPC                                                                                           |
| Enrichment Score:     |                                                          |                                                                                                                  |
| Annotation Cluster 14 | 2.196229016581442                                        |                                                                                                                  |
| Category              | Term                                                     | Genes                                                                                                            |
| KEGG_PATHWAY          | ecv03430:Mismatch repair                                 | XSEA, UVRD, LIGA, MUTH                                                                                           |
| Enrichment Score:     |                                                          |                                                                                                                  |
| Annotation Cluster 15 | 2.1750395605481305                                       |                                                                                                                  |
| Category              | Term                                                     | Genes                                                                                                            |
| SP_PIR_KEYWORDS       | cell wall biogenesis/degradation                         | MLTF, MRCA, MLTA, AMID, AMIC, MLTB, MLTD, AMIA, DACB, DACD                                                       |
| GOTERM_BP_FAT         | GO:0045229~external encapsulating structure organization | MLTF, YRAI, YCBF, WZC, DACB, DACD, MRCA, MLTA, AMID, AMIC, MLTB, MLTD, AMIA, YQIH, YCBR                          |
| GOTERM_BP_FAT         | GO:0007047~cell wall organization                        | MLTF, YRAI, YCBF, DACB, DACD, MRCA, MLTA, AMID, AMIC, MLTB, MLTD, AMIA, YQIH, YCBR                               |
| GOTERM_BP_FAT         | GO:0000271~polysaccharide biosynthetic process           | RCSA, KDSC, WCAA, WZC, WCAB, CLD, DACB, DACD, WZA, WZB, PRC, UGD, MRCA, MLTA, ASMA, AMIC, MLTB, AMIA             |
| GOTERM_BP_FAT         | GO:0005976~polysaccharide metabolic process              | RCSA, YEGX, KDSC, WCAA, WZC, WCAB, CLD, DACB, DACD, WZA, WZB, PRC, UGD, MRCA, MLTA, AMID, ASMA, AMIC, MLTB, AMIA |
| SP_PIR_KEYWORDS       | cell shape                                               | YFGA, MRCA, DACB, DACD                                                                                           |
| KEGG_PATHWAY          | ecd00550:Peptidoglycan biosynthesis                      | MRCA, DACB, DACD                                                                                                 |
| GOTERM_BP_FAT         | GO:0008360~regulation of cell shape                      | YFGA, MRCA, DACB, DACD                                                                                           |
| Enrichment Score:     |                                                          |                                                                                                                  |
| Annotation Cluster 16 | 2.136664960213052                                        |                                                                                                                  |

| Category                                                      | Term                                                  | Genes                                                                                                                                         |
|---------------------------------------------------------------|-------------------------------------------------------|-----------------------------------------------------------------------------------------------------------------------------------------------|
| KEGG_PATHWAY                                                  | ecr00053:Ascorbate and aldarate metabolism            | GUDX, GUDD, UGD, GARL                                                                                                                         |
| GOTERM_BP_FAT                                                 | GO:0016054~organic acid catabolic process             | GUDX, SPEA, GUDD, GARL, ARCA, THRL, FADJ                                                                                                      |
| GOTERM_BP_FAT                                                 | GO:0046395~carboxylic acid catabolic process          | GUDX, SPEA, GUDD, GARL, ARCA, THRL, FADJ                                                                                                      |
| Enrichment Score:<br>Annotation Cluster 17 2.1055151957596534 |                                                       |                                                                                                                                               |
| Category                                                      | Term                                                  | Genes                                                                                                                                         |
| SP_PIR_KEYWORDS                                               | palmitate                                             | YFHM, MDTP, NLPD, APBE, WZA, SMPA, MGRB, YFIB, AMID, MLTA, MLTB, MLTD, YFGH                                                                   |
| SP_PIR_KEYWORDS                                               | lipoprotein                                           | YFHM, MDTP, NLPD, DEDD, APBE, WZA, SMPA, MGRB, YFIB, YIDX, MLTA, AMID, MLTB, MLTD, YFGH                                                       |
| GOTERM_CC_FAT                                                 | GO:0031225~anchored to membrane                       | YFHM, MDTP, SMPA, NLPD, YFIB, MLTA, APBE, AMID, YFGH, MLTD                                                                                    |
| UP_SEQ_FEATURE                                                | lipid moiety-binding region:N-palmitoyl cysteine      | YFHM, MDTP, NLPD, APBE, WZA, SMPA, MGRB, YFIB, AMID, MLTA, MLTB, MLTD, YFGH                                                                   |
| UP_SEQ_FEATURE                                                | lipid moiety-binding region:S-diacylglycerol cysteine | YFHM, MDTP, NLPD, APBE, WZA, SMPA, MGRB, YFIB, AMID, MLTA, MLTB, MLTD, YFGH                                                                   |
| GOTERM_CC_FAT                                                 | GO:0009279~cell outer membrane                        | MDTP, NANC, MLTF, YRAJ, ENVY, WZA, SMPA, YFIB, YTFM, MLTA, NFRA, AMID, MLTB, FLU, YFGH                                                        |
| GOTERM_CC_FAT                                                 | GO:0019867~outer membrane                             | MDTP, NANC, MLTF, YRAJ, ENVY, WZA, SMPA, YFAL, YTFM, YFIB, MLTA, NFRA, AMID, MLTB, FLU, YFGH                                                  |
| Enrichment Score:<br>Annotation Cluster 18 2.0381646171219305 |                                                       |                                                                                                                                               |
| Category                                                      | Term                                                  | Genes                                                                                                                                         |
| GOTERM_BP_FAT                                                 | GO:0009242~colanic acid biosynthetic process          | RCSA, WZA, WZB, UGD, WCAA, WZC, WCAB                                                                                                          |
| GOTERM_BP_FAT                                                 | GO:0016051~carbohydrate biosynthetic process          | NANE, NAGE, NANA, WZA, NANT, WZB, PRC, MRCA, UGD, NANK, RCSA, WCAA, KDSC, WCAB, WZC, CLD, DACB, DACD, ASMA, MLTA, AMIC, MLTB, AMIA, CSRA, EPD |
| GOTERM_BP_FAT                                                 | GO:0000271~polysaccharide biosynthetic process        | RCSA, KDSC, WCAA, WZC, WCAB, CLD, DACB, DACD, WZA, WZB, PRC, UGD, MRCA, MLTA, ASMA, AMIC, MLTB, AMIA                                          |

|                 |                                                            |                                                                                                                  |
|-----------------|------------------------------------------------------------|------------------------------------------------------------------------------------------------------------------|
|                 | GO:0042280~cell surface antigen activity, host-interacting | RCSA, UGD, ASMA, NANA, CLD                                                                                       |
| GOTERM_MF_FAT   |                                                            |                                                                                                                  |
|                 | GO:0005976~polysaccharide metabolic process                | RCSA, YEGX, KDSC, WCAA, WZC, WCAB, CLD, DACB, DACD, WZA, WZB, PRC, UGD, MRCA, MLTA, AMID, ASMA, AMIC, MLTB, AMIA |
| GOTERM_BP_FAT   |                                                            |                                                                                                                  |
|                 | lipopolysaccharide biosynthesis                            | KDSC, WCAA, WCAB, CLD                                                                                            |
| SP_PIR_KEYWORDS |                                                            |                                                                                                                  |

|                       |                                      |                  |
|-----------------------|--------------------------------------|------------------|
|                       | Enrichment Score: 1.9931258934494718 |                  |
| Annotation Cluster 19 |                                      |                  |
| Category              | Term                                 | Genes            |
|                       | eum00310:Lysine degradation          | ATOB, CADA, FADJ |
| KEGG_PATHWAY          |                                      |                  |

|                       |                                                                  |                                  |
|-----------------------|------------------------------------------------------------------|----------------------------------|
|                       | Enrichment Score: 1.955691199999416                              |                                  |
| Annotation Cluster 20 |                                                                  |                                  |
| Category              | Term                                                             | Genes                            |
|                       | GO:0015949~nucleobase, nucleoside and nucleotide interconversion | PYRH, CMK, XAPR, XAPA, SPOT, GMK |
| GOTERM_BP_FAT         |                                                                  |                                  |

|                       |                                                           |                                                                                                                             |
|-----------------------|-----------------------------------------------------------|-----------------------------------------------------------------------------------------------------------------------------|
|                       | Enrichment Score: 1.867920143569332                       |                                                                                                                             |
| Annotation Cluster 21 |                                                           |                                                                                                                             |
| Category              | Term                                                      | Genes                                                                                                                       |
|                       | electron transport                                        | SDHA, YEAX, SDHC, SDHD, HCAC, YGCR, YNFG, NORV                                                                              |
| SP_PIR_KEYWORDS       |                                                           |                                                                                                                             |
|                       | GO:0006091~generation of precursor metabolites and energy | NARP, NARQ, HYBC, ATP1, HYFI, NUOH, YNFG, YNFH, SDHA, YEAX, SDHC, MGTA, SDHD, DLD, HCAC, YGCR, MLTD, PFLC, CSRA, NORV, DMSC |
| GOTERM_BP_FAT         |                                                           |                                                                                                                             |
|                       | GO:0022900~electron transport chain                       | SDHA, YEAX, SDHC, SDHD, HCAC, YGCR, YNFG, NORV, DMSC, YNFH                                                                  |
| GOTERM_BP_FAT         |                                                           |                                                                                                                             |

|                       |                                      |                                                                                         |
|-----------------------|--------------------------------------|-----------------------------------------------------------------------------------------|
|                       | Enrichment Score: 1.8638896700960417 |                                                                                         |
| Annotation Cluster 22 |                                      |                                                                                         |
| Category              | Term                                 | Genes                                                                                   |
|                       | magnesium                            | GUDX, GARL, PTSP, KDSC, NUDG, SPEA, GUDD, ISPD, MGTA, LIGA, PHOQ, MUTT, NUDC, GMK, YFAU |
| SP_PIR_KEYWORDS       |                                      |                                                                                         |

|                       |                                      |       |
|-----------------------|--------------------------------------|-------|
|                       | Enrichment Score: 1.8579286992190174 |       |
| Annotation Cluster 23 |                                      |       |
| Category              | Term                                 | Genes |

|               |                                                           |                                                                                                                             |
|---------------|-----------------------------------------------------------|-----------------------------------------------------------------------------------------------------------------------------|
| GOTERM_BP_FAT | GO:0009061~anaerobic respiration                          | NARP, NARQ, HYBC, HYFI, MLTD, NUOH, PFLC, DMSC, YNFH                                                                        |
| GOTERM_BP_FAT | GO:0045333~cellular respiration                           | NARP, NARQ, HYBC, HYFI, NUOH, YNFH, SDHA, SDHC, SDHD, DLD, MLTD, PFLC, DMSC                                                 |
| GOTERM_BP_FAT | GO:0006091~generation of precursor metabolites and energy | NARP, NARQ, HYBC, ATP1, HYFI, NUOH, YNFG, YNFH, SDHA, YEAX, SDHC, MGTA, SDHD, DLD, HCAC, YGCR, MLTD, PFLC, CSRA, NORV, DMSC |

|                       |                                                      |                                    |
|-----------------------|------------------------------------------------------|------------------------------------|
| Enrichment Score:     |                                                      |                                    |
| Annotation Cluster 24 | 1.8566558223268543                                   |                                    |
| Category              | Term                                                 | Genes                              |
| SP_PIR_KEYWORDS       | iron-sulfur protein                                  | YAGT, YNFE, YNFF, YNFG             |
| INTERPRO              | IPR017909:Twin arginine translocation signal, Tat    | YAGT, EFEB, AMIC, AMIA, YNFE, YNFF |
| INTERPRO              | IPR006311:Twin-arginine translocation pathway signal | YAGT, EFEB, AMIC, AMIA, YNFE, YNFF |

|                       |                                               |                                                            |
|-----------------------|-----------------------------------------------|------------------------------------------------------------|
| Enrichment Score:     |                                               |                                                            |
| Annotation Cluster 25 | 1.8406693287771927                            |                                                            |
| Category              | Term                                          | Genes                                                      |
| KEGG_PATHWAY          | ecd00860:Porphyrin and chlorophyll metabolism | HEMF, COBU, COBS, HEMN                                     |
| GOTERM_BP_FAT         | GO:0018130~heterocycle biosynthetic process   | YAGT, YAFE, HEMF, COBU, APBE, PROP, COBS, HEMN, HISL, BISC |
| GOTERM_BP_FAT         | GO:0051188~cofactor biosynthetic process      | FEAB, COAE, HEMF, COBU, YGGC, COBS, EPD, HEMN              |

|                       |                                                        |                                         |
|-----------------------|--------------------------------------------------------|-----------------------------------------|
| Enrichment Score:     |                                                        |                                         |
| Annotation Cluster 26 | 1.8045263666454574                                     |                                         |
| Category              | Term                                                   | Genes                                   |
| SP_PIR_KEYWORDS       | sos response                                           | UVRD, LEXA, RECQ, CHO                   |
| GOTERM_BP_FAT         | GO:0009991~response to extracellular stimulus          | UVRD, LEXA, RECQ, CHO, CSTA, DINF, SPOT |
| GOTERM_BP_FAT         | GO:0009432~SOS response                                | UVRD, LEXA, RECQ, CHO, DINF             |
| GOTERM_BP_FAT         | GO:0031668~cellular response to extracellular stimulus | UVRD, LEXA, RECQ, CHO, CSTA, DINF       |



| Enrichment Score:     |                                                  |                             |
|-----------------------|--------------------------------------------------|-----------------------------|
| Annotation Cluster 27 | 1.7573895430205617                               |                             |
| Category              | Term                                             | Genes                       |
| KEGG_PATHWAY          | ecg00630:Glyoxylate and dicarboxylate metabolism | GARK, GHRA, GARR, GLXR, HYI |

| Enrichment Score:     |                                           |                  |
|-----------------------|-------------------------------------------|------------------|
| Annotation Cluster 28 | 1.7332313998861009                        |                  |
| Category              | Term                                      | Genes            |
| SP_PIR_KEYWORDS       | gluconate utilization                     | IDNT, GNTU, IDNR |
| GOTERM_BP_FAT         | GO:0019520~aldonic acid metabolic process | IDNT, GNTU, IDNR |
| GOTERM_BP_FAT         | GO:0019521~D-gluconate metabolic process  | IDNT, GNTU, IDNR |

| Enrichment Score:     |                                            |                                                                |
|-----------------------|--------------------------------------------|----------------------------------------------------------------|
| Annotation Cluster 29 | 1.7240255946878682                         |                                                                |
| Category              | Term                                       | Genes                                                          |
| SP_PIR_KEYWORDS       | nuclease                                   | SBCD, XSEA, RNE, YEIH, RECE, SBCC, MUTH                        |
| GOTERM_BP_FAT         | GO:0009057~macromolecule catabolic process | SBCD, XSEA, MUG, YEGX, AMID, RNE, AMIC, AMIA, CSRA, RECE, SBCC |
| SP_PIR_KEYWORDS       | Endonuclease                               | SBCD, RNE, CHO, YEIH, THRL, SBCC, MUTH                         |
| SP_PIR_KEYWORDS       | exonuclease                                | SBCD, XSEA, RECE, SBCC                                         |
| GOTERM_MF_FAT         | GO:0004518~nuclease activity               | SBCD, XSEA, RNE, CHO, YEIH, THRL, RECE, SBCC, MUTH             |

| Enrichment Score:     |                          |                 |
|-----------------------|--------------------------|-----------------|
| Annotation Cluster 30 | 1.7174443313132048       |                 |
| Category              | Term                     | Genes           |
| KEGG_PATHWAY          | ecg03018:RNA degradation | RNE, PCNB, RECQ |

| Enrichment Score:     |                    |                        |
|-----------------------|--------------------|------------------------|
| Annotation Cluster 31 | 1.6978773216516245 |                        |
| Category              | Term               | Genes                  |
| SP_PIR_KEYWORDS       | dioxygenase        | YEAX, HCAF, HCAC, ALKB |

|               |                                                                                                                                                             |                        |
|---------------|-------------------------------------------------------------------------------------------------------------------------------------------------------------|------------------------|
|               | GO:0016702~oxidoredu<br>ctase activity, acting on<br>single donors with<br>incorporation of<br>molecular oxygen,<br>incorporation of two<br>atoms of oxygen | YEAX, HCAF, HCAC, ALKB |
| GOTERM_MF_FAT |                                                                                                                                                             |                        |

Enrichment Score:  
Annotation Cluster 32 1.6339792435832559

| Category | Term | Genes |
|----------|------|-------|
|----------|------|-------|

|               |                                                   |                              |
|---------------|---------------------------------------------------|------------------------------|
| GOTERM_BP_FAT | GO:0046349~amino<br>sugar biosynthetic<br>process | NANE, NANT, NAGE, NANK, NANA |
|---------------|---------------------------------------------------|------------------------------|

|               |                                                       |                                         |
|---------------|-------------------------------------------------------|-----------------------------------------|
| GOTERM_BP_FAT | GO:0046364~monosacc<br>haride biosynthetic<br>process | NANE, NANT, NAGE, NANK, NANA, CSRA, EPD |
|---------------|-------------------------------------------------------|-----------------------------------------|

|              |                                                            |                             |
|--------------|------------------------------------------------------------|-----------------------------|
| KEGG_PATHWAY | ecd00520:Amino sugar<br>and nucleotide sugar<br>metabolism | NANE, UGD, NAGE, NANK, NANA |
|--------------|------------------------------------------------------------|-----------------------------|

|               |                                                 |                                                                             |
|---------------|-------------------------------------------------|-----------------------------------------------------------------------------|
| GOTERM_BP_FAT | GO:0005996~monosacc<br>haride metabolic process | NANE, GARR, GALR, NAGE, NANA, YIHS, NANT, YGBJ, GLXR, NANK, CSRA, PFLC, EPD |
|---------------|-------------------------------------------------|-----------------------------------------------------------------------------|

Enrichment Score:  
Annotation Cluster 33 1.6006178952648982

| Category | Term | Genes |
|----------|------|-------|
|----------|------|-------|

|                 |         |                        |
|-----------------|---------|------------------------|
| SP_PIR_KEYWORDS | Symport | YIHO, SHIA, PROP, KGTP |
|-----------------|---------|------------------------|

|          |                                                    |                                    |
|----------|----------------------------------------------------|------------------------------------|
| INTERPRO | IPR005829: Sugar<br>transporter, conserved<br>site | NANT, SHIA, YJHB, YGCS, PROP, KGTP |
|----------|----------------------------------------------------|------------------------------------|

|          |                                             |                        |
|----------|---------------------------------------------|------------------------|
| INTERPRO | IPR005828: General<br>substrate transporter | SHIA, YJHB, PROP, KGTP |
|----------|---------------------------------------------|------------------------|

|          |                                       |                  |
|----------|---------------------------------------|------------------|
| INTERPRO | IPR004736: Citrate-<br>proton symport | SHIA, PROP, KGTP |
|----------|---------------------------------------|------------------|

|                 |                                                 |                  |
|-----------------|-------------------------------------------------|------------------|
| PIR_SUPERFAMILY | PIRSF003274: citrate<br>utilization determinant | SHIA, PROP, KGTP |
|-----------------|-------------------------------------------------|------------------|

Enrichment Score:  
Annotation Cluster 34 1.5642268962258008

| Category | Term | Genes |
|----------|------|-------|
|----------|------|-------|

|               |                                                                  |                                   |
|---------------|------------------------------------------------------------------|-----------------------------------|
|               | GO:0015949~nucleobase, nucleoside and nucleotide interconversion | PYRH, CMK, XAPR, XAPA, SPOT, GMK  |
| GOTERM_BP_FAT | ecd00230:Purine metabolism                                       | GUAD, YBCF, RPOZ, XAPA, SPOT, GMK |

|                       |                                           |                                                            |
|-----------------------|-------------------------------------------|------------------------------------------------------------|
| Enrichment Score:     |                                           |                                                            |
| Annotation Cluster 35 | 1.532127508373884                         |                                                            |
| Category              | Term                                      | Genes                                                      |
| SP_PIR_KEYWORDS       | s-adenosyl-l-methionine                   | RLMN, TRMA, YFIC, YGDE, TRMI, CMOB, PFLC, HEMN             |
| SP_PIR_KEYWORDS       | methyltransferase                         | YAFE, RLMN, TRMA, YFIC, YGDE, ALKB, TRMI, CMOB, YGBN, YBCY |
| GOTERM_MF_FAT         | GO:0008173~RNA methyltransferase activity | RLMN, TRMA, TRMI, CMOB                                     |

|                       |                                      |                                                                                                                                                                                                                                                                                                                           |
|-----------------------|--------------------------------------|---------------------------------------------------------------------------------------------------------------------------------------------------------------------------------------------------------------------------------------------------------------------------------------------------------------------------|
| Enrichment Score:     |                                      |                                                                                                                                                                                                                                                                                                                           |
| Annotation Cluster 36 | 1.4593204053832587                   |                                                                                                                                                                                                                                                                                                                           |
| Category              | Term                                 | Genes                                                                                                                                                                                                                                                                                                                     |
| SP_PIR_KEYWORDS       | nucleotide-binding                   | NARP, NARQ, SRMB, COBU, YGGC, YEAP, ALAS, REP, OBGE, DHAR, MGTA, PHOQ, RECQ, NANK, YRBF, RTCA, GMK, GARK, YFHK, YFJK, COAE, UVRD, CMK, MDLB, YEJH, WZC, UUP, YBCF, RSTB, ZNUC, PYRH, YFHA, PHR, PCNB, YEHX, YGFQ, POTA, YFJP, SBCC                                                                                        |
| SP_PIR_KEYWORDS       | atp-binding                          | NARP, NARQ, SRMB, COBU, YGGC, ALAS, REP, DHAR, MGTA, PHOQ, RECQ, NANK, YRBF, RTCA, GMK, GARK, YFHK, YFJK, COAE, UVRD, CMK, MDLB, YEJH, WZC, UUP, YBCF, RSTB, ZNUC, PYRH, YFHA, YFAL, PCNB, YEHX, YGFQ, POTA, SBCC                                                                                                         |
| GOTERM_MF_FAT         | GO:0017076~purine nucleotide binding | NARP, NARQ, SRMB, COBU, YGGC, YEAP, ALAS, REP, OBGE, DHAR, MGTA, PHOQ, RECQ, NANK, YRBF, AEGA, NORW, RTCA, GMK, GARK, YFJK, YFHK, COAE, UVRD, YGCU, CMK, MDLB, YEJH, WZC, UUP, YBCF, YEDI, ZNUB, SDHA, RSTB, ZNUC, PYRH, YFHA, YFAL, DLD, YEHX, PCNB, YGFQ, HCAD, POTA, YFJP, YGFT, SBCC                                  |
| GOTERM_MF_FAT         | GO:0001882~nucleoside binding        | NARP, NARQ, SRMB, COBU, YGGC, ALAS, REP, DHAR, MGTA, PHOQ, RECQ, NANK, YRBF, AEGA, NORW, RTCA, GMK, GARK, YFHK, YFJK, COAE, UVRD, YGCU, CMK, MDLB, YEJH, WZC, UUP, YBCF, YEDI, ZNUB, SDHA, RSTB, ZNUC, PYRH, YFHA, YFAL, DLD, YEHX, PCNB, YGFQ, HCAD, POTA, YGFT, SBCC                                                    |
| GOTERM_MF_FAT         | GO:0000166~nucleotide binding        | NARP, NARQ, SRMB, YEAP, ALAS, MGTA, UGD, PHOQ, RECQ, NANK, NORW, NORV, YFHK, UVRD, YGCU, MDLB, YBCF, UUP, YEDI, RSTB, PYRH, YFHA, DLD, AROE, YEHX, EPD, COBU, YGGC, REP, OBGE, DHAR, AEGA, YRBF, RTCA, FADJ, GMK, GARK, YFJK, COAE, CMK, YEJH, WZC, SDHA, ZNUB, ZNUC, YFAL, PHR, PCNB, YGFQ, HCAD, POTA, YFJP, SBCC, YGFT |

|                       |                    |       |
|-----------------------|--------------------|-------|
| Enrichment Score:     |                    |       |
| Annotation Cluster 37 | 1.3673289282575685 |       |
| Category              | Term               | Genes |

|                 |                                      |                                                                                                                                                     |
|-----------------|--------------------------------------|-----------------------------------------------------------------------------------------------------------------------------------------------------|
| SP_PIR_KEYWORDS | iron                                 | EFEB, PPHA, YDHY, YNFE, YNFF, YNFG, RLMN, YIAY, BFR, AEGA, PFLC, HEMN, NORV, YFHL, HYBC, GARL, FTNA, HYFI, YAGT, YEAX, SDHC, SDHD, HCAC, ALKB, YGFT |
| SP_PIR_KEYWORDS | iron-sulfur                          | YFHL, YDHY, HYFI, YNFE, YNFF, YNFG, YAGT, YEAX, RLMN, HCAC, AEGA, PFLC, HEMN, YGFT                                                                  |
| SP_PIR_KEYWORDS | 4fe-4s                               | RLMN, YFHL, YDHY, HYFI, AEGA, YNFE, YNFF, PFLC, YNFG, HEMN, YGFT                                                                                    |
| GOTERM_MF_FAT   | GO:0005506~iron ion binding          | YFHL, GARL, EFEB, PPHA, FTNA, YDHY, HYFI, YNFE, YNFF, YNFG, YAGT, YEAX, RLMN, YIAY, BFR, SDHC, SDHD, HCAC, AEGA, ALKB, PFLC, NORV, HEMN, YGFT       |
| GOTERM_MF_FAT   | GO:0009055~electron carrier activity | YJHC, YFHL, YDHY, YNFE, YNFF, YNFG, BISC, SDHA, YAGT, YEAX, SDHC, HCAC, AEGA, HCAD, YGCR, NORW, NORV, YGFT                                          |

Enrichment Score:

Annotation Cluster 38 1.3600012340233274

| Category        | Term         | Genes                                              |
|-----------------|--------------|----------------------------------------------------|
| SP_PIR_KEYWORDS | Flavoprotein | SDHA, YEAX, YGCU, DLD, PHR, YGCR, HCAD, NORW, NORV |
| SP_PIR_KEYWORDS | FAD          | SDHA, YGCU, DLD, PHR, YGCR, HCAD, NORW             |
