# Supplementary material for: Central role for RNase YbeY in Hfq-dependent and Hfq-independent small-RNA regulation in bacteria
Source: PubMed Central journal article supplement (PMC3933206; doi:10.1186/1471-2164-15-121), 2014-02-11
Supplement: 1471-2164-15-121-S7.pdf [file 1471-2164-15-121-S7.pdf]

**Supplemental Table 7. Functional clusters of genes differentially down-regulated in *ΔybeY* vs. WT under HU**

| Enrichment Score:    |                                                           |                                                                                                                                                                                                                                                                                                                                                                                                                                                                                                                                                                                                                                                                                                                                                                                                                                         |
|----------------------|-----------------------------------------------------------|-----------------------------------------------------------------------------------------------------------------------------------------------------------------------------------------------------------------------------------------------------------------------------------------------------------------------------------------------------------------------------------------------------------------------------------------------------------------------------------------------------------------------------------------------------------------------------------------------------------------------------------------------------------------------------------------------------------------------------------------------------------------------------------------------------------------------------------------|
| Annotation Cluster 1 | 18.267660213706964                                        |                                                                                                                                                                                                                                                                                                                                                                                                                                                                                                                                                                                                                                                                                                                                                                                                                                         |
| Category             | Term                                                      | Genes                                                                                                                                                                                                                                                                                                                                                                                                                                                                                                                                                                                                                                                                                                                                                                                                                                   |
|                      |                                                           | MAEB, ENO, HYCI, MAEA, CPDB, CRR, XTHA, GLDA, FUMB, GLPK, HEMB, NRFC, NARH, PRLC, NARG, RECR, NARI, MALS, YQHD, PGM, SLYD, CUTA, GLCF, PURF, PEPD, MELA, MOEA, HMP, YCGM, YSAA, HYFG, NIKR, PURA, RUMA, YCCM, SUCC, GSHB, RIBA, YGCO, PEPQ, YBJI, PFKA, YJJW, PURT, USHA, NAPG, MANA, NAPH, GPMM, NFUA, NAPF, NACP, HYPD, CCA, NAPA, NAPB, AMPD, GLOA, HYPA, HYPB, PTSI, SPEB, YFCE, DCP, PTSA, NRDF, YJES, RNHA, CDD, PPA, YIDA, BTUB, HCR, HCP, NRFA, PYKF, FUCI, HPT, GALT, FBP, DDLA, NIRB, YBIY, PQQL, TDH, DKSA, YBEY, GLMM, DEOB, SODA, CCME, SODC                                                                                                                                                                                                                                                                               |
| SP_PIR_KEYWORDS      | metal-binding                                             |                                                                                                                                                                                                                                                                                                                                                                                                                                                                                                                                                                                                                                                                                                                                                                                                                                         |
|                      |                                                           | MAEB, ENO, HYCI, UPP, MAEA, GLDA, EUTC, FUMB, FECA, PRLC, RECR, NIKD, FECB, NIKE, FECC, ZUR, MALS, NIKB, NIKC, PGM, YQHD, MALQ, NIKA, CUTA, ENTF, GLCF, FECI, FECE, FECD, FECR, KDSB, YSAA, ENTB, NIKR, SUCC, YCCM, RIBA, YGCO, YBJI, LNT, PURT, MIAA, NAPG, MANA, GPMM, NAPH, NFUA, NAPF, NACP, NAPA, NAPB, GLOA, YQCA, KDPA, PTSI, PTSA, NRDF, CDD, PPA, BTUB, NRFA, PYKF, GALT, FTNB, NIRB, MOBA, TDH, YBEY, GLMM, DEOB, CCME, FHUC, FHUD, CRR, CPDB, PCK, XTHA, GLPK, HEMB, NRFC, NARH, NARG, DXS, NARI, GLPX, SLYD, FHUB, FHUA, YIIM, PURF, PEPD, NLPE, MELA, MOEA, FEOB, HMP, FEOA, YCGM, HYFG, PURA, RUMA, GLGX, GSHB, ADE, PEPQ, HSLO, PFKA, YJJW, USHA, HYPD, CCA, AMPD, HYPA, HYPB, YHDH, SPEB, UXAA, YFCE, DCP, YJES, RNHA, YIDA, HCR, HCP, FUCI, YNCB, YHJJ, HPT, NADK, FBP, DDLA, PQQL, YBIY, DKSA, ZRAS, BGLA, SODA, SODC |
| GOTERM_MF_FAT        | GO:0043169~cation binding                                 |                                                                                                                                                                                                                                                                                                                                                                                                                                                                                                                                                                                                                                                                                                                                                                                                                                         |
| Enrichment Score:    |                                                           |                                                                                                                                                                                                                                                                                                                                                                                                                                                                                                                                                                                                                                                                                                                                                                                                                                         |
| Annotation Cluster 2 | 14.621421866464393                                        |                                                                                                                                                                                                                                                                                                                                                                                                                                                                                                                                                                                                                                                                                                                                                                                                                                         |
| Category             | Term                                                      | Genes                                                                                                                                                                                                                                                                                                                                                                                                                                                                                                                                                                                                                                                                                                                                                                                                                                   |
|                      |                                                           | YJJW, ENO, FRDC, NAPG, NAPH, NAPF, HYPC, NACP, HYPD, NARX, NAPD, HYPE, NAPA, NAPB, FUMB, HYPA, NRFC, NARH, NARG, NIKD, NARJ, NARI, NIKE, NARL, MENB, NRFA, PYKF, LPD, HYFG, NIRB, TORR, YBIY, NIRD, UBIE                                                                                                                                                                                                                                                                                                                                                                                                                                                                                                                                                                                                                                |
| GOTERM_BP_FAT        | GO:0009061~anaerobic respiration                          |                                                                                                                                                                                                                                                                                                                                                                                                                                                                                                                                                                                                                                                                                                                                                                                                                                         |
|                      |                                                           | LDHA, ENO, FRDC, NARX, FUMB, NRFC, NARH, NARG, NIKD, NARJ, NARI, NIKE, NARL, GLCF, GLPD, YSAA, HYFG, SUCB, YCCM, SUCC, ARCB, GPMA, GLGX, UBIE, YGCO, PFKA, YJJW, TPIA, NAPG, GPMM, NAPH, NAPF, HYPC, NACP, HYPD, NAPD, NAPA, HYPE, NAPB, HYPA, HYPB, YQCA, GLGA, FHLA, PPC, MENB, HCR, NRFA, PYKF, LPD, DSBB, NIRB, TORR, GRXB, GPSA, GRXC, GRXD, YBIY, NIRD, ZRAS                                                                                                                                                                                                                                                                                                                                                                                                                                                                      |
| GOTERM_BP_FAT        | GO:0006091~generation of precursor metabolites and energy |                                                                                                                                                                                                                                                                                                                                                                                                                                                                                                                                                                                                                                                                                                                                                                                                                                         |
| Enrichment Score:    |                                                           |                                                                                                                                                                                                                                                                                                                                                                                                                                                                                                                                                                                                                                                                                                                                                                                                                                         |
| Annotation Cluster 3 | 14.206932936809334                                        |                                                                                                                                                                                                                                                                                                                                                                                                                                                                                                                                                                                                                                                                                                                                                                                                                                         |
| Category             | Term                                                      | Genes                                                                                                                                                                                                                                                                                                                                                                                                                                                                                                                                                                                                                                                                                                                                                                                                                                   |

|                 |                     |                                                                                                                                                                                                                                                                                                                                                                                                                                                                                                                                                                                                   |
|-----------------|---------------------|---------------------------------------------------------------------------------------------------------------------------------------------------------------------------------------------------------------------------------------------------------------------------------------------------------------------------------------------------------------------------------------------------------------------------------------------------------------------------------------------------------------------------------------------------------------------------------------------------|
| SP_PIR_KEYWORDS | cell inner membrane | YGAZ, HTPG, YOHJ, MALF, MALG, HDED, PSTB, GLTK, FABI, ATOS, GLTL, MALK, YBBM, NIKD, FECC, NIKE, NIKB, NIKC, YBBY, GNTP, MALX, FECE, FECD, SYD, WBBK, YCCM, NUPG, NUPC, YBJM, YDCO, BASS, LNT, YDDG, NAPH, NAPC, KDPA, DDPB, GLNQ, YRFF, GALP, GLNP, MANY, MANZ, YIAD, LPD, CCMC, CCMD, CCMA, CCMB, CYNX, SAPB, NIRC, YAAJ, EXBD, EXBB, CCME, FHUC, YEAI, FRDC, DCUC, DCUB, NEPI, NARX, TQSA, NARI, MDTF, NARK, MDTL, FHUB, FEOB, HEMX, YPDA, YIHY, YHCB, ARCB, YHBX, YCDT, YIDG, YIDI, PGAC, AMPE, MIND, YJJL, YIJD, YBHS, YJIY, YJEM, RFAL, MTLA, ADIC, YBAN, DSBB, TONB, FUCP, YGJV, EXUT, ZRAS |
|-----------------|---------------------|---------------------------------------------------------------------------------------------------------------------------------------------------------------------------------------------------------------------------------------------------------------------------------------------------------------------------------------------------------------------------------------------------------------------------------------------------------------------------------------------------------------------------------------------------------------------------------------------------|

|                 |               |                                                                                                                                                                                                                                                                                                                                                                                                                                                                                                                                                                                                                                                                                                                                                                    |
|-----------------|---------------|--------------------------------------------------------------------------------------------------------------------------------------------------------------------------------------------------------------------------------------------------------------------------------------------------------------------------------------------------------------------------------------------------------------------------------------------------------------------------------------------------------------------------------------------------------------------------------------------------------------------------------------------------------------------------------------------------------------------------------------------------------------------|
| SP_PIR_KEYWORDS | cell membrane | YHID, YGAZ, HTPG, MALF, YOHJ, MALG, HDED, PSTB, FABI, GLTK, GLTL, ATOS, MALK, YBBM, FECA, NIKD, NIKE, FECC, NIKB, NIKC, MIPA, YBBY, GNTP, MALX, FECE, FECD, SYD, YJET, YICE, WBBK, NUPG, YEDD, YCCM, NUPC, YBJM, BASS, YDCO, LNT, YAJI, YHHN, YDDG, NAPH, NAPC, OMPC, KDPA, DDPB, GLNQ, YRFF, GALP, LAMB, GLNP, MANY, BTUB, MANZ, MTGA, YIAD, LPD, CCMC, CCMD, CCMA, CCMB, CYNX, SAPB, NIRC, YAAJ, EXBD, TSX, EXBB, CCME, FHUC, YEAI, FRDC, DCUC, DCUB, NEPI, NARX, TQSA, NARH, NARG, NARI, MDTF, MDTL, NARK, FHUB, FHUA, YIGM, NLPE, FEOB, HEMX, YPDA, YIHY, YHCB, ARCB, YHBX, YCDT, YIDE, YQGA, YIDG, YIDI, YNBD, PGAA, PGAC, PGAB, AMPE, MIND, YJJL, YIJD, YBHS, FADL, YJIY, YJEM, RFAL, MTLA, ADIC, YBAN, DSBB, TONB, FUCP, YGJV, EXUT, YJDO, ZRAS, BAMC, BAMA |
|-----------------|---------------|--------------------------------------------------------------------------------------------------------------------------------------------------------------------------------------------------------------------------------------------------------------------------------------------------------------------------------------------------------------------------------------------------------------------------------------------------------------------------------------------------------------------------------------------------------------------------------------------------------------------------------------------------------------------------------------------------------------------------------------------------------------------|

|                      |                                    |                                                                                         |
|----------------------|------------------------------------|-----------------------------------------------------------------------------------------|
| Annotation Cluster 4 | Enrichment Score:                  |                                                                                         |
| Category             | Term                               | Genes                                                                                   |
| KEGG_PATHWAY         | eco00030:Pentose phosphate pathway | TALB, GND, FBP, ZWF, IDNK, GHRB, RPIB, DEOC, DEOB, RPIA, EDD, EDA, PGM, GLPX, PFKA, PGL |

|                      |                                       |                                                                                         |
|----------------------|---------------------------------------|-----------------------------------------------------------------------------------------|
| Annotation Cluster 5 | Enrichment Score:                     |                                                                                         |
| Category             | Term                                  | Genes                                                                                   |
| KEGG_PATHWAY         | ecg00010:Glycolysis / Gluconeogenesis | ENO, TPIA, MALX, PYKF, GPMM, CRR, PCK, LPD, FBP, AGP, GALM, GPMA, BGLA, PGM, GLPX, PFKA |

|                      |                   |                                                                                                                                                                                     |
|----------------------|-------------------|-------------------------------------------------------------------------------------------------------------------------------------------------------------------------------------|
| Annotation Cluster 6 | Enrichment Score: |                                                                                                                                                                                     |
| Category             | Term              | Genes                                                                                                                                                                               |
| SP_PIR_KEYWORDS      | periplasm         | USHA, FHUD, CPDB, YBHG, YCFS, NAPA, MALE, NAPB, HDEA, MALM, AGP, SPY, CSGC, TPX, GLTI, FECB, MALS, SLT, NIKA, GLNH, NRFA, DSBA, YHJJ, FECR, YBCL, RNA, MPPA, PPIA, LOLA, DCRB, SODC |

|                 |        |                                                                                                                                                                                                                                                                                                                                                                                                |
|-----------------|--------|------------------------------------------------------------------------------------------------------------------------------------------------------------------------------------------------------------------------------------------------------------------------------------------------------------------------------------------------------------------------------------------------|
| SP_PIR_KEYWORDS | signal | FHUD, CPDB, YIBG, MALG, YCFS, MALE, HDEB, HDEA, MALM, NRFC, SPY, CSGC, YMGD, GLTI, TQSA, FECA, FECB, FECC, MALS, SLT, NIKC, MIPA, FHUA, NIKA, NLPE, YACC, YIIQ, YCGJ, YBJH, YBCL, YCGK, YEDD, RNA, MPPA, LOLA, EUTM, LNT, YAJI, DCRB, USHA, NAPG, PGAA, YBHG, PGAB, NAPA, YADE, YNFD, NAPB, OMPC, AGP, LAMB, FADL, BTUB, GLNH, NRFA, YIAD, YHJJ, DSBA, CYNX, PPIA, YEEZ, BAMC, TSX, BAMA, SODC |
|-----------------|--------|------------------------------------------------------------------------------------------------------------------------------------------------------------------------------------------------------------------------------------------------------------------------------------------------------------------------------------------------------------------------------------------------|

|                       |                                          |                                                                                                                                                                                                                                                                                                                                                                                                |
|-----------------------|------------------------------------------|------------------------------------------------------------------------------------------------------------------------------------------------------------------------------------------------------------------------------------------------------------------------------------------------------------------------------------------------------------------------------------------------|
| GOTERM_CC_FAT         | GO:0042597~periplasmic space             | FHUD, USHA, CPDB, YBHG, NAPD, YCFS, NAPA, MALE, NAPB, HDEA, GALM, MALM, AGP, SPY, TPX, GLTI, FECB, MALS, SLT, NIKA, GLNH, NRFA, DSBA, YHJJ, FECD, TONB, CCMA, YBCL, RNA, MPPA, PPIA, LOLA, DCRB, SODC                                                                                                                                                                                          |
| UP_SEQ_FEATURE        | signal peptide                           | FHUD, CPDB, YIBG, MALG, YCFS, MALE, HDEB, HDEA, MALM, NRFC, SPY, CSGC, YMGD, GLTI, TQSA, FECA, FECB, FECC, MALS, SLT, NIKC, MIPA, FHUA, NIKA, NLPE, YACC, YIIQ, YCGJ, YBJH, YBCL, YCGK, YEDD, RNA, MPPA, LOLA, EUTM, LNT, YAJI, DCRB, USHA, NAPG, PGAA, YBHG, PGAB, NAPA, YADE, YNFD, NAPB, OMPC, AGP, LAMB, FADL, BTUB, GLNH, NRFA, YIAD, YHJJ, DSBA, CYNX, PPIA, YEEZ, BAMC, TSX, BAMA, SODC |
| Annotation Cluster 7  | Enrichment Score: 8.587064481568945      |                                                                                                                                                                                                                                                                                                                                                                                                |
| Category              | Term                                     | Genes                                                                                                                                                                                                                                                                                                                                                                                          |
| KEGG_PATHWAY          | ecx00051:Fructose and mannose metabolism | MANZ, TPIA, FUCK, MTLA, MAK, MANA, MTLA, FUCI, SRLD, FBP, SRLB, MANY, GLPX, PFKA                                                                                                                                                                                                                                                                                                               |
| Annotation Cluster 8  | Enrichment Score: 8.251536126069754      |                                                                                                                                                                                                                                                                                                                                                                                                |
| Category              | Term                                     | Genes                                                                                                                                                                                                                                                                                                                                                                                          |
| SP_PIR_KEYWORDS       | ATP                                      | FHUC, PCK, MIND, SERS, KDPA, PSTB, GALK, GLTL, MALK, GLNQ, FHLA, GLNS, MFD, NIKD, MDTF, NIKE, GLNL, GLNG, SUFC, HSLU, UVRB, CCMA, HELD, MURF, CLPP, GROS, GSHB, PFKA, GROL                                                                                                                                                                                                                     |
| UP_SEQ_FEATURE        | nucleotide phosphate-binding region:ATP  | FHUC, PURT, MIAA, PCK, MIND, SERS, PSTB, GALK, GLPK, GLTL, YBBL, MALK, GLNQ, MFD, FHLA, RARA, NIKD, NIKE, DING, HEPA, GLNG, ANMK, SUFC, NADE, MAK, HSLU, FECE, UVRB, DDLA, IDNK, CCMA, HELD, SUCC, MURF, YBJD, YEEZ, GSHB, PRKB, EUTP, PFKA                                                                                                                                                    |
| SMART                 | SM00382:AAA                              | GLNG, FHUC, SUFC, DNAC, FECE, HSLU, YBHF, PSTB, GLTL, YBBL, CCMA, MALK, GLNQ, FHLA, RARA, NIKD, NIKE                                                                                                                                                                                                                                                                                           |
| INTERPRO              | IPR003593:ATPase, AAA+ type, core        | GLNG, FHUC, SUFC, DNAC, FECE, HSLU, YBHF, PSTB, GLTL, YBBL, CCMA, MALK, GLNQ, FHLA, RARA, NIKD, NIKE                                                                                                                                                                                                                                                                                           |
| GOTERM_MF_FAT         | GO:0016887~ATPase activity               | FHUC, SUFC, FECE, HSLU, YBHF, MIND, PSTB, KDPA, GLTL, YBBL, CCMA, HELD, MALK, GLNQ, MFD, NIKD, YBHS, NIKE, NIKB, NIKC, DING, NIKA                                                                                                                                                                                                                                                              |
| Annotation Cluster 9  | Enrichment Score: 7.40947326383826       |                                                                                                                                                                                                                                                                                                                                                                                                |
| Category              | Term                                     | Genes                                                                                                                                                                                                                                                                                                                                                                                          |
| KEGG_PATHWAY          | ecd02010:ABC transporters                | FHUC, FHUD, MALF, MALG, MALE, PSTB, GLTK, GLTL, DDPB, MALK, GLNQ, GLTI, GLNP, FECB, NIKD, FECC, NIKE, YBHS, NIKB, NIKC, FHUB, NIKA, GLNH, FECE, FECD, CCMC, CCMA, CCMB, MPPA, SAPB                                                                                                                                                                                                             |
| Annotation Cluster 10 | Enrichment Score: 7.169711766510374      |                                                                                                                                                                                                                                                                                                                                                                                                |
| Category              | Term                                     | Genes                                                                                                                                                                                                                                                                                                                                                                                          |

|                 |                    |                                                                                                                                                                                                                                                                                                                                                                                                                                                                                                                                               |
|-----------------|--------------------|-----------------------------------------------------------------------------------------------------------------------------------------------------------------------------------------------------------------------------------------------------------------------------------------------------------------------------------------------------------------------------------------------------------------------------------------------------------------------------------------------------------------------------------------------|
| SP_PIR_KEYWORDS | nucleotide-binding | FHUC, CPDB, CRP, HTPG, PCK, NARX, PSTB, METL, GLPK, GLTL, YBBL, ATOS, GSP, MALK, MFD, NIKD, RARA, NIKE, NARL, YIHA, DING, EUTT, ANMK, ENTF, HSLU, FECE, UVRB, THIK, FEOB, PURC, PURA, SUCC, MURF, ARCB, YBJD, YAJQ, CLPP, GLYQ, GSHB, RIBA, PRKB, BASS, EUTP, PFKA, XYLB, PURT, MIAA, USHA, DNAC, YJIA, DHAL, CCA, YBHF, MIND, HSCC, SERS, KDPA, HYPB, GALK, MOAB, GLNQ, RFAY, FHLA, GLNS, ASNA, NRDE, RFAP, ASNC, GLNL, HEPA, GLNG, SUFC, FUCK, PYKF, NADE, MAK, GLNA, NADK, FBP, DDLA, IDNK, CCMA, HELD, MOBA, ZRAS, YEEZ, COAD, SELB, GROL |
|-----------------|--------------------|-----------------------------------------------------------------------------------------------------------------------------------------------------------------------------------------------------------------------------------------------------------------------------------------------------------------------------------------------------------------------------------------------------------------------------------------------------------------------------------------------------------------------------------------------|

|               |                               |                                                                                                                                                                                                                                                                                                                                                                                                                                                                                                                                                                                                                                                                                                              |
|---------------|-------------------------------|--------------------------------------------------------------------------------------------------------------------------------------------------------------------------------------------------------------------------------------------------------------------------------------------------------------------------------------------------------------------------------------------------------------------------------------------------------------------------------------------------------------------------------------------------------------------------------------------------------------------------------------------------------------------------------------------------------------|
| GOTERM_MF_FAT | GO:0000166~nucleotide binding | LDHA, MAEB, MAEA, HTPG, MHPF, PSTB, GLTL, ATOS, YBBL, FABG, GOR, MALK, MFD, NIKD, RARA, NIKE, PANE, PDXH, EUTT, ENTF, FECE, UVRB, THIK, SUCC, YBJD, YAJQ, CLPP, RIBA, PRKB, BASS, EUTP, UBIF, PURT, MIAA, DNAC, GND, YJIA, DHAL, SERS, YQCA, KDPA, GALK, MOAB, GLNQ, GRPE, GLNS, NRDE, GLNL, GLNG, HEPA, PYKF, GLNA, LPD, NIRB, CCMA, MOBA, GROS, YEEZ, COAD, GROL, FHUC, CPDB, CRP, PCK, NARX, METL, GLPK, GSP, YIGZ, HEMG, NARL, AZOR, YIHA, DING, ANMK, AHPF, HSLU, FEOB, PURC, HYFG, YPDA, PURA, GHRB, MURF, ARCB, GSHB, TRXB, GLYQ, PFKA, XYLB, USHA, CCA, YBHF, HSCC, MIND, HYPB, USPF, FHLA, ASNA, RFAP, YBHS, ASNC, SUFC, FUCK, NADE, MAK, NADK, FBP, DDLA, RFAD, IDNK, GPSA, HELD, ZRAS, NEMA, SELB |
|---------------|-------------------------------|--------------------------------------------------------------------------------------------------------------------------------------------------------------------------------------------------------------------------------------------------------------------------------------------------------------------------------------------------------------------------------------------------------------------------------------------------------------------------------------------------------------------------------------------------------------------------------------------------------------------------------------------------------------------------------------------------------------|

|               |                                   |                                                                                                                                                                                                                                                                                                                                                                                                                                                                                                                                                |
|---------------|-----------------------------------|------------------------------------------------------------------------------------------------------------------------------------------------------------------------------------------------------------------------------------------------------------------------------------------------------------------------------------------------------------------------------------------------------------------------------------------------------------------------------------------------------------------------------------------------|
| GOTERM_MF_FAT | GO:0032553~ribonucleotide binding | FHUC, CRP, HTPG, PCK, NARX, METL, PSTB, GLPK, GLTL, YBBL, ATOS, GSP, YIGZ, MALK, MFD, NIKD, RARA, NIKE, NARL, YIHA, DING, EUTT, ANMK, ENTF, HSLU, FECE, UVRB, THIK, FEOB, PURC, YPDA, PURA, SUCC, MURF, ARCB, YBJD, CLPP, GLYQ, GSHB, RIBA, PRKB, BASS, EUTP, PFKA, XYLB, PURT, MIAA, DNAC, YJIA, DHAL, CCA, YBHF, MIND, HSCC, SERS, KDPA, HYPB, GALK, USPF, MOAB, GLNQ, FHLA, GLNS, ASNA, NRDE, RFAP, ASNC, YBHS, GLNL, HEPA, GLNG, SUFC, FUCK, PYKF, NADE, MAK, GLNA, NADK, DDLA, IDNK, CCMA, HELD, MOBA, GROS, ZRAS, YEEZ, COAD, SELB, GROL |
|---------------|-----------------------------------|------------------------------------------------------------------------------------------------------------------------------------------------------------------------------------------------------------------------------------------------------------------------------------------------------------------------------------------------------------------------------------------------------------------------------------------------------------------------------------------------------------------------------------------------|

Enrichment Score:  
Annotation Cluster 11 7.157803847119591

| Category        | Term                          | Genes                                                                                                                                                                                                                               |
|-----------------|-------------------------------|-------------------------------------------------------------------------------------------------------------------------------------------------------------------------------------------------------------------------------------|
| SP_PIR_KEYWORDS | phosphoprotein                | ENO, CRR, HTPG, NARX, USPA, PTSI, ATOS, AGP, PTSH, PTSA, KBL, CPXR, HEML, NARL, PGM, UVRY, GLNL, MALP, CHBB, GLNG, ENTF, MALX, NADE, MTLA, GLNA, SRLB, GLYA, ACPP, YPDB, TORR, ARCB, GPMA, BAER, QSEB, ZRAS, GLMM, BASS, BASR, GROL |
| KEGG_PATHWAY    | ecd02020:Two-component system | GLNG, MAEA, FRDC, DCUB, GLNA, NARX, OMPC, KDPA, TORR, ATOS, ARCB, BAER, NARH, QSEB, ZRAS, NARG, NARJ, CPXR, NARI, NARL, BASS, BASR, UVRY, GLNL                                                                                      |

Enrichment Score:  
Annotation Cluster 12 6.914277362344854

| Category      | Term                                  | Genes                                                                                                                                                                                                                                                                                                |
|---------------|---------------------------------------|------------------------------------------------------------------------------------------------------------------------------------------------------------------------------------------------------------------------------------------------------------------------------------------------------|
| GOTERM_BP_FAT | GO:0051186~cofactor metabolic process | FUMB, MOG, HEMB, HEMC, GOR, HEMD, HEMG, HEML, PANE, ENTF, FSAB, EUTT, MELA, MOEA, GLYA, HEMX, ENTB, SUCB, SUCC, GSHB, UBIE, UBIF, TPIA, NFUA, GND, NAPA, MIND, ZWF, MOAC, MOAB, PPC, RPIB, GALE, RPIA, SUFD, MENB, NADC, TALB, TESB, SUFB, NADE, CYSG, LPD, RFAD, BIOH, FOLP, YFBB, MOBA, COAD, FOLD |

| Enrichment Score:     |                                                                                     |                                                                                               |
|-----------------------|-------------------------------------------------------------------------------------|-----------------------------------------------------------------------------------------------|
| Annotation Cluster 13 | 6.209774307271593                                                                   |                                                                                               |
| Category              | Term                                                                                | Genes                                                                                         |
| SP_PIR_KEYWORDS       | nitrate assimilation                                                                | NIRB, NIRD, NIRC, NARH, NARG, NARX, NAPA, NARJ, NARI, NARL, NARK                              |
| GOTERM_MF_FAT         | GO:0016661~oxidoreductase activity, acting on other nitrogenous compounds as donors | NRFA, HCP, NAPG, NAPH, NAPC, NAPD, NAPA, NAPB, QUEF, NIRB, NRFC, NIRD, NARH, NARG, NARJ, NARI |
| GOTERM_BP_FAT         | GO:0042128~nitrate assimilation                                                     | NIRB, NIRD, NIRC, NARH, NARG, NARX, NAPA, NARJ, NARI, NARL, NARK                              |
| KEGG_PATHWAY          | ecj00910:Nitrogen metabolism                                                        | NIRB, NRFA, NADE, MALY, GLNA, NIRD, NARH, NARG, ASNA, NAPA, NARJ, NARI                        |

| Enrichment Score:     |                            |                                                                                                         |
|-----------------------|----------------------------|---------------------------------------------------------------------------------------------------------|
| Annotation Cluster 14 | 6.0238501611374735         |                                                                                                         |
| Category              | Term                       | Genes                                                                                                   |
| KEGG_PATHWAY          | eum00230:Purine metabolism | PURH, PURT, USHA, PURF, PYKF, CPDB, PURN, HPT, POLA, PURC, PURB, PURA, NRDF, DEOD, NRDE, DEOB, ADE, ADD |

| Enrichment Score:     |                                            |                                                                      |
|-----------------------|--------------------------------------------|----------------------------------------------------------------------|
| Annotation Cluster 15 | 5.398310024763359                          |                                                                      |
| Category              | Term                                       | Genes                                                                |
| GOTERM_BP_FAT         | GO:0009410~response to xenobiotic stimulus | AHPC, NLPE, CYNX, TPX, AHPF, EUTM, CPXR, EUTN, NEMA, SODA, DTD, SODC |
| GOTERM_BP_FAT         | GO:0006805~xenobiotic metabolic process    | AHPC, NLPE, CYNX, TPX, AHPF, EUTM, CPXR, EUTN, NEMA, SODA, DTD, SODC |
| GOTERM_MF_FAT         | GO:0016209~antioxidant activity            | AHPC, GOR, TPX, AHPF, TRXB, SODA, SODC                               |

| Enrichment Score:     |                   |                                                                                                                                                                            |
|-----------------------|-------------------|----------------------------------------------------------------------------------------------------------------------------------------------------------------------------|
| Annotation Cluster 16 | 5.239692204335017 |                                                                                                                                                                            |
| Category              | Term              | Genes                                                                                                                                                                      |
| SP_PIR_KEYWORDS       | magnesium         | PURT, MIAA, ENO, UPP, CCA, XTHA, PTSI, HEMB, PTSA, RNHA, DXS, RFAP, PPA, YIDA, PGM, PURF, PYKF, MOEA, HPT, FBP, DDLA, KDSB, PURA, SUCC, MOBA, RIBA, GLMM, GSHB, YBJI, PFKA |

| Enrichment Score:     |                                     |                                                                                                                                                                                                              |
|-----------------------|-------------------------------------|--------------------------------------------------------------------------------------------------------------------------------------------------------------------------------------------------------------|
| Annotation Cluster 17 | 4.999456300041487                   |                                                                                                                                                                                                              |
| Category              | Term                                | Genes                                                                                                                                                                                                        |
| GOTERM_BP_FAT         | GO:0019318~hexose metabolic process | YJJW, ENO, TPIA, MAEA, GPMM, GND, PCK, ZWF, GALK, GLGA, GALM, AGP, RHAR, RPIB, GALE, RPIA, FUCU, GALF, PGM, PGL, FSAB, FSA, TALB, PYKF, FUCK, FUCI, GALT, LPD, FBP, FUCP, YBIY, GPMA, GLGX, GLMM, PRKB, PFKA |



---

|  |                                                      |                                                                     |
|--|------------------------------------------------------|---------------------------------------------------------------------|
|  | ecx00520:Amino sugar and nucleotide sugar metabolism | MANZ, GALK, MAK, MANA, CRR, GALT, GALE, GLMM, MANY, GALF, PGM, NAGZ |
|--|------------------------------------------------------|---------------------------------------------------------------------|

---

|               |                                              |                        |
|---------------|----------------------------------------------|------------------------|
| GOTERM_BP_FAT | GO:0009242~colanic acid biosynthetic process | GALK, MANA, GALT, GALE |
|---------------|----------------------------------------------|------------------------|

---

Enrichment Score:  
Annotation Cluster 21 4.615717451270133

---

| Category | Term | Genes |
|----------|------|-------|
|----------|------|-------|

---

|               |                                                                  |                                                                                                                |
|---------------|------------------------------------------------------------------|----------------------------------------------------------------------------------------------------------------|
| GOTERM_BP_FAT | GO:0015949~nucleobase, nucleoside and nucleotide interconversion | PURH, UDP, UPP, CPDB, HPT, PURA, NUPG, NUPC, CYTR, NRDF, DEOD, NRDE, DEOC, CDD, MTN, DEOB, TSX, DEOA, RNK, ADD |
|---------------|------------------------------------------------------------------|----------------------------------------------------------------------------------------------------------------|

---

|              |                                |                                                               |
|--------------|--------------------------------|---------------------------------------------------------------|
| KEGG_PATHWAY | ecv00240:Pyrimidine metabolism | USHA, UDP, UPP, CPDB, DEOD, NRDF, NRDE, TRXB, CDD, POLA, DEOA |
|--------------|--------------------------------|---------------------------------------------------------------|

---

Enrichment Score:  
Annotation Cluster 22 4.554719739185943

---

| Category | Term | Genes |
|----------|------|-------|
|----------|------|-------|

---

|               |                                                            |                                                                                                                  |
|---------------|------------------------------------------------------------|------------------------------------------------------------------------------------------------------------------|
| GOTERM_MF_FAT | GO:0042280~cell surface antigen activity, host-interacting | RFAF, KDSA, RFAL, RFAI, RFAJ, GALT, KDSB, RFAD, WAAU, RFAB, GALK, RFAZ, LPCA, RFAY, GLMM, RFAP, GALE, COAD, RFAS |
|---------------|------------------------------------------------------------|------------------------------------------------------------------------------------------------------------------|

---

|              |                                          |                                                                                                                                                                                                                                                                                                                                |
|--------------|------------------------------------------|--------------------------------------------------------------------------------------------------------------------------------------------------------------------------------------------------------------------------------------------------------------------------------------------------------------------------------|
| KEGG_PATHWAY | ecj00540:Lipopolysaccharide biosynthesis | RFAF, KDSA, RFAL, RFAI, RFAJ, KDSB, RFAD, WAAU, RFAB, LPCA, RFAY, GMHB, RFAP, ENO, TPIA, MAEA, MANA, PCK, WAAU, GALK, LDCA, GLGA, RFAZ, RFAY, RFAP, GALE, GALF, SLT, RFAS, MIPA, MTGA, RFAF, KDSA, RFAL, RFAI, RFAJ, GALT, FBP, DDLA, KDSB, RFAD, WBBK, RFAB, GPSA, MURF, LPCA, GPMA, GMHB, GLGX, MURI, AGAW, GLMM, AGAV, NAGZ |
|--------------|------------------------------------------|--------------------------------------------------------------------------------------------------------------------------------------------------------------------------------------------------------------------------------------------------------------------------------------------------------------------------------|

---

|               |                                              |            |
|---------------|----------------------------------------------|------------|
| GOTERM_BP_FAT | GO:0016051~carbohydrate biosynthetic process | AGAV, NAGZ |
|---------------|----------------------------------------------|------------|

---

Enrichment Score:  
Annotation Cluster 23 4.287359536606784

---

| Category | Term | Genes |
|----------|------|-------|
|----------|------|-------|

---

|              |                                                   |                                                |
|--------------|---------------------------------------------------|------------------------------------------------|
| KEGG_PATHWAY | ecf00040:Pentose and glucuronate interconversions | UXAA, UXAB, UXUA, UXAC, UXUB, EDA, GALF, XYL B |
|--------------|---------------------------------------------------|------------------------------------------------|

---

Enrichment Score:  
Annotation Cluster 24 4.0638673942719885

---

| Category | Term | Genes |
|----------|------|-------|
|----------|------|-------|

---

|              |                                        |                                                   |
|--------------|----------------------------------------|---------------------------------------------------|
| KEGG_PATHWAY | ecx00500:Starch and sucrose metabolism | GLGA, MALX, MAK, CRR, MALS, GALF, PGM, MALQ, MALP |
|--------------|----------------------------------------|---------------------------------------------------|

---

| Enrichment Score:     |                        |                                    |
|-----------------------|------------------------|------------------------------------|
| Annotation Cluster 25 | 4.021769067741989      |                                    |
| Category              | Term                   | Genes                              |
| SP_PIR_KEYWORDS       | heat shock             | HSLU, CLPP, HTPG, HSLV, GROS, GROL |
| SP_PIR_KEYWORDS       | stress-induced protein | HSLU, HTPG, HSLV, GROS, GROL       |

| Enrichment Score:     |                                                |                                               |
|-----------------------|------------------------------------------------|-----------------------------------------------|
| Annotation Cluster 26 | 3.960141562655923                              |                                               |
| Category              | Term                                           | Genes                                         |
| SP_PIR_KEYWORDS       | glycolysis                                     | ENO, TPIA, PYKF, GPMM, GPMA, LPD, PFKA        |
| INTERPRO              | IPR005952:Phosphoglycerate mutase 1            | GPMA                                          |
| GOTERM_MF_FAT         | GO:0016866~intramolecular transferase activity | LPCA, GPMM, GPMA, RLUA, GLMM, DEOB, HEML, PGM |

| Enrichment Score:     |                                         |                                                                                                                                   |
|-----------------------|-----------------------------------------|-----------------------------------------------------------------------------------------------------------------------------------|
| Annotation Cluster 27 | 3.9049103811687464                      |                                                                                                                                   |
| Category              | Term                                    | Genes                                                                                                                             |
| GOTERM_BP_FAT         | GO:0009110~vitamin biosynthetic process | PDXH, MENB, EUTT, NADC, NADE, CYSG, MELA, DKGB, DKGA, GLYA, MIND, RFAD, SELA, FOLP, BIOH, YFBB, RIBC, DXS, RIBA, GALE, UBIE, FOLD |

| Enrichment Score:     |                                 |                                                |
|-----------------------|---------------------------------|------------------------------------------------|
| Annotation Cluster 28 | 3.5432343804934217              |                                                |
| Category              | Term                            | Genes                                          |
| SP_PIR_KEYWORDS       | carbon-oxygen lyase             | UXAA, CAIB, HEMB, HEMD, UXUA, MGSA, UXUB, FUMB |
| SP_PIR_KEYWORDS       | hydro-lyase                     | UXAA, CAIB, HEMB, HEMD, UXUA, UXUB, FUMB       |
| GOTERM_MF_FAT         | GO:0016836~hydro-lyase activity | UXAA, ENO, HEMB, MOAB, HEMD, UXUA, EDD, FUMB   |

| Enrichment Score:     |                                                                                     |                                                                                                                                                                                                                                                                           |
|-----------------------|-------------------------------------------------------------------------------------|---------------------------------------------------------------------------------------------------------------------------------------------------------------------------------------------------------------------------------------------------------------------------|
| Annotation Cluster 29 | 3.5189824617412615                                                                  |                                                                                                                                                                                                                                                                           |
| Category              | Term                                                                                | Genes                                                                                                                                                                                                                                                                     |
| SP_PIR_KEYWORDS       | iron                                                                                | FHUC, YJJW, FHUD, NAPG, NAPH, NFUA, NAPF, NAPC, NAPA, NAPB, FUMB, UXAA, NRFC, NARH, FECA, NARG, NRDF, YJES, FECB, FECC, NARI, FHUB, FHUA, HCR, ENTF, GLCF, FECI, NRFA, HCP, FECE, FECD, GALT, FEOB, FECR, HMP, FEOA, ENTB, HYFG, YSAA, NIRB, RUMA, YCCM, YBIY, YGCO, CCME |
| SP_PIR_KEYWORDS       | electron transport                                                                  | GLCF, HCR, NRFA, NAPG, NAPH, NAPF, NAPC, DSBB, NAPA, NAPB, YSAA, YQCA, GRXB, GRXC, NRFC, YCCM, GRXD, NARH, NARG, NARI, YGCO                                                                                                                                               |
| GOTERM_MF_FAT         | GO:0016661~oxidoreductase activity, acting on other nitrogenous compounds as donors | NRFA, HCP, NAPG, NAPH, NAPC, NAPD, NAPA, NAPB, QUEF, NIRB, NRFC, NIRD, NARH, NARG, NARJ, NARI                                                                                                                                                                             |



|                       |                                                        |                                                                                                                                                                                                                                                                                       |
|-----------------------|--------------------------------------------------------|---------------------------------------------------------------------------------------------------------------------------------------------------------------------------------------------------------------------------------------------------------------------------------------|
| SP_PIR_KEYWORDS       | 4fe-4s                                                 | YJJW, GLCF, NAPG, NAPH, NFUA, NAPF, NAPA, YSAA, FUMB, HYFG, RUMA, NIRB, NRFC, YCCM, YBIY, NARH, NARG, YJES                                                                                                                                                                            |
| GOTERM_MF_FAT         | GO:0005506~iron ion binding                            | FHUC, YJJW, FHUD, NAPG, NAPH, NFUA, NAPF, NAPC, NAPA, NAPB, FUMB, YQCA, UXAA, NRFC, NARH, FECA, NARG, NRDF, YJES, FECB, FECC, NARI, FHUB, FHUA, HCR, ENTF, GLCF, FECI, NRFA, HCP, FECE, FECD, GALT, FEOB, FECR, HMP, FTNB, FEOA, ENTB, YSAA, HYFG, NIRB, RUMA, YCCM, YBIY, YGCO, CCME |
| GOTERM_MF_FAT         | GO:0008940~nitrate reductase activity                  | NAPG, NAPH, NAPC, NARH, NAPD, NARG, NAPA, NARJ, NAPB, NARI                                                                                                                                                                                                                            |
| Enrichment Score:     |                                                        |                                                                                                                                                                                                                                                                                       |
| Annotation Cluster 30 | 3.3648891683359463                                     |                                                                                                                                                                                                                                                                                       |
| Category              | Term                                                   | Genes                                                                                                                                                                                                                                                                                 |
| SP_PIR_KEYWORDS       | porphyrin biosynthesis                                 | HEMB, HEMC, HEMD, CYSG, HEMG, HEMX, HEML                                                                                                                                                                                                                                              |
| KEGG_PATHWAY          | ecj00860:Porphyrin and chlorophyll metabolism          | EUTT, HEMB, HEMC, HEMD, CYSG, HEMG, HEMX, HEML                                                                                                                                                                                                                                        |
| Enrichment Score:     |                                                        |                                                                                                                                                                                                                                                                                       |
| Annotation Cluster 31 | 3.2263528130035257                                     |                                                                                                                                                                                                                                                                                       |
| Category              | Term                                                   | Genes                                                                                                                                                                                                                                                                                 |
| KEGG_PATHWAY          | ecx00480:Glutathione metabolism                        | GSP, PEPD, GOR, GND, GSHB, ZWF                                                                                                                                                                                                                                                        |
| Enrichment Score:     |                                                        |                                                                                                                                                                                                                                                                                       |
| Annotation Cluster 32 | 3.2086828653133614                                     |                                                                                                                                                                                                                                                                                       |
| Category              | Term                                                   | Genes                                                                                                                                                                                                                                                                                 |
| GOTERM_BP_FAT         | GO:0017004~cytochrome complex assembly                 | CUTA, CCMC, CCMD, CCMA, CCMB, NRFA, NAPC, NAPB, NARI, CCME                                                                                                                                                                                                                            |
| SP_PIR_KEYWORDS       | chromoprotein                                          | NRFA, NAPC, HMP, NARI, CCME                                                                                                                                                                                                                                                           |
| GOTERM_BP_FAT         | GO:0043933~macromolecular complex subunit organization | CUTA, FECI, NRFA, NAPC, NAPB, YAEJ, HYPB, PRFA, CCMC, CCMD, CCMA, SECB, CCMB, NARI, CCME                                                                                                                                                                                              |
| Enrichment Score:     |                                                        |                                                                                                                                                                                                                                                                                       |
| Annotation Cluster 33 | 3.1804594750438735                                     |                                                                                                                                                                                                                                                                                       |
| Category              | Term                                                   | Genes                                                                                                                                                                                                                                                                                 |
| SP_PIR_KEYWORDS       | phage recognition                                      | LAMB, TSX, FADL, TONB, OMPC, BTUB, FHUA                                                                                                                                                                                                                                               |
| GOTERM_BP_FAT         | GO:0051606~detection of stimulus                       | GLNG, LAMB, TSX, FADL, TONB, OMPC, BTUB, FHUA                                                                                                                                                                                                                                         |
| GOTERM_BP_FAT         | GO:0009581~detection of external stimulus              | LAMB, TSX, FADL, TONB, OMPC, BTUB, FHUA                                                                                                                                                                                                                                               |
| SP_PIR_KEYWORDS       | cell outer membrane receptor                           | NLPE, PGAA, LAMB, FECA, BAMC, TSX, FADL, BAMA, OMPC, BTUB, FHUA, MIPA                                                                                                                                                                                                                 |
| SP_PIR_KEYWORDS       | receptor                                               | LAMB, FECA, TSX, TONB, BTUB, YHHM, FHUA                                                                                                                                                                                                                                               |

|                 |                                                  |                                                                                                                                                     |
|-----------------|--------------------------------------------------|-----------------------------------------------------------------------------------------------------------------------------------------------------|
| SP_PIR_KEYWORDS | Porin                                            | LAMB, TSX, OMPC, BTUB                                                                                                                               |
| GOTERM_CC_FAT   | GO:0046930~pore complex                          | LAMB, TSX, OMPC, BTUB                                                                                                                               |
| GOTERM_CC_FAT   | GO:0009279~cell outer membrane                   | NLPE, PGAA, YBHG, YIAD, OMPC, LAMB, FECA, BAMC, MDTF, TSX, FADL, BAMA, BTUB, MIPA, FHUA                                                             |
| GOTERM_CC_FAT   | GO:0044462~external encapsulating structure part | GLNH, NLPE, PGAA, YBHG, DSBA, YIAD, TONB, OMPC, CCMA, GLTI, LAMB, FECA, LOLA, BAMC, MDTF, FADL, TSX, BAMA, BTUB, FHUA, MIPA                         |
| GOTERM_CC_FAT   | GO:0030313~cell envelope                         | PGAA, YBHG, OMPC, GLTK, YRFF, GLTI, LAMB, FECA, GLNP, MDTF, FADL, MIPA, FHUA, BTUB, GLNH, NLPE, DSBA, YIAD, FEOB, TONB, CCMA, LOLA, BAMC, TSX, BAMA |

Enrichment Score:  
Annotation Cluster 34 2.9848364695122975

| Category        | Term                                                                 | Genes                                                                                                              |
|-----------------|----------------------------------------------------------------------|--------------------------------------------------------------------------------------------------------------------|
| SP_PIR_KEYWORDS | disulfide bond                                                       | AHPC, USHA, AHPF, DSBA, LPD, DSBB, HDEA, GRXB, YBCL, GRXC, GOR, RNA, LAMB, NRDE, TRXB, MALS, HSLO, SLT, FHUA, SODC |
| SP_PIR_KEYWORDS | Redox-active center                                                  | GRXB, AHPC, GRXC, GRXD, GOR, AHPF, DSBA, DSBB, LPD, TRXB, HSLO                                                     |
| UP_SEQ_FEATURE  | disulfide bond                                                       | AHPC, USHA, AHPF, DSBA, LPD, DSBB, HDEA, GRXB, YBCL, GRXC, GOR, RNA, LAMB, NRDE, TRXB, MALS, HSLO, SLT, FHUA, SODC |
| GOTERM_BP_FAT   | GO:0045454~cell redox homeostasis                                    | GRXB, AHPC, GRXC, GRXD, GOR, TPX, AHPF, YBBN, DSBA, LPD                                                            |
| GOTERM_MF_FAT   | GO:0016667~oxidoreductase activity, acting on sulfur group of donors | GRXB, GRXC, GRXD, GOR, AHPF, DSBA, DSBB, LPD, TRXB                                                                 |
| GOTERM_BP_FAT   | GO:0019725~cellular homeostasis                                      | GRXB, AHPC, GRXC, GRXD, GOR, TPX, AHPF, YBBN, DSBA, LPD, FTNB                                                      |

Enrichment Score:  
Annotation Cluster 35 2.9062381357974165

| Category      | Term                                    | Genes                                                         |
|---------------|-----------------------------------------|---------------------------------------------------------------|
| GOTERM_BP_FAT | GO:0046165~alcohol biosynthetic process | GPSA, ENO, MAEA, TPIA, KDSA, GPMA, PCK, AGAW, FBP, KDSB, AGAV |

Enrichment Score:  
Annotation Cluster 36 2.9034072021863233

| Category | Term                                                    | Genes |
|----------|---------------------------------------------------------|-------|
| INTERPRO | IPR005670:Phosphate transport system permease protein 1 | PSTB  |
| INTERPRO | IPR015850:ABC transporter, phosphate import, PstB       | PSTB  |

|                       |                                                                       |                                                                                   |
|-----------------------|-----------------------------------------------------------------------|-----------------------------------------------------------------------------------|
| GOTERM_MF_FAT         | GO:0042625~ATPase activity, coupled to transmembrane movement of ions | NIKD, NIKE, NIKB, MIND, NIKC, KDPA, NIKA, PSTB                                    |
| GOTERM_MF_FAT         | GO:0015103~inorganic anion transmembrane transporter activity         | MIND, NARK, PSTB                                                                  |
| GOTERM_BP_FAT         | GO:0015698~inorganic anion transport                                  | SSEA, PHOU, NARK, PSTB                                                            |
| PIR_SUPERFAMILY       | PIRSF002759:inner membrane protein MalK                               | FHUC, MALK, PSTB                                                                  |
| Enrichment Score:     |                                                                       |                                                                                   |
| Annotation Cluster 37 | 2.8300261754331455                                                    |                                                                                   |
| Category              | Term                                                                  | Genes                                                                             |
| KEGG_PATHWAY          | ecj00620:Pyruvate metabolism                                          | MAEB, LDHA, MAEA, PYKF, MGSA, PCK, PPC, LPD, GLOA, MHPF                           |
| Enrichment Score:     |                                                                       |                                                                                   |
| Annotation Cluster 38 | 2.824104862323159                                                     |                                                                                   |
| Category              | Term                                                                  | Genes                                                                             |
| UP_SEQ_FEATURE        | nucleotide phosphate-binding region:NADP                              | MAEB, YDBC, DKGB, DKGA, HMP, RFAD, METL, YHDH, FABG, YAJO, YQHD, YDHF, PANE, YDFG |
| PIR_SUPERFAMILY       | PIRSF000097:aldo-keto reductase                                       | YAJO, YDBC, DKGB, DKGA, YDHF                                                      |
| INTERPRO              | IPR001395:Aldo/keto reductase                                         | YAJO, YDBC, DKGB, DKGA, YDHF                                                      |
| Enrichment Score:     |                                                                       |                                                                                   |
| Annotation Cluster 39 | 2.7814636880035564                                                    |                                                                                   |
| Category              | Term                                                                  | Genes                                                                             |
| SP_PIR_KEYWORDS       | purine nucleotide biosynthesis                                        | PURH, PURT, PURN, PURC, PURB, PURA                                                |
| SP_PIR_KEYWORDS       | purine biosynthesis                                                   | PURH, PURT, PURF, PURN, PURC, PURB, FOLD, PURA                                    |
| KEGG_PATHWAY          | ecd00670:One carbon pool by folate                                    | PURH, PURT, PURN, GLYA, FOLD                                                      |
| GOTERM_BP_FAT         | GO:0006164~purine nucleotide biosynthetic process                     | PURH, PURT, PURF, PURN, PURC, PURB, FOLD, PURA, ADD                               |
| GOTERM_BP_FAT         | GO:0006163~purine nucleotide metabolic process                        | PURH, PURT, PURF, PURN, PURC, PURB, FOLD, PURA, ADD                               |

| Enrichment Score:     |                                        |                                                                                                                                                                                                                                                                                                                                                                                        |
|-----------------------|----------------------------------------|----------------------------------------------------------------------------------------------------------------------------------------------------------------------------------------------------------------------------------------------------------------------------------------------------------------------------------------------------------------------------------------|
| Annotation Cluster 40 | 2.540938451274983                      |                                                                                                                                                                                                                                                                                                                                                                                        |
| Category              | Term                                   | Genes                                                                                                                                                                                                                                                                                                                                                                                  |
| SP_PIR_KEYWORDS       | glycerol metabolism                    | GLPK, DHAL, DHAK, GLDA, GLPD                                                                                                                                                                                                                                                                                                                                                           |
| KEGG_PATHWAY          | ecd00561:Glycerolipid metabolism       | GLPK, MELA, DHAL, DHAK, GLDA                                                                                                                                                                                                                                                                                                                                                           |
| GOTERM_BP_FAT         | GO:0019400~alditol metabolic process   | GLPK, GPSA, DHAL, DHAK, GLDA, GLPD, GLPX                                                                                                                                                                                                                                                                                                                                               |
| GOTERM_BP_FAT         | GO:0019751~polyol metabolic process    | GLPK, GPSA, DHAL, DHAK, GLDA, GLPD, GLPX                                                                                                                                                                                                                                                                                                                                               |
| Enrichment Score:     |                                        |                                                                                                                                                                                                                                                                                                                                                                                        |
| Annotation Cluster 41 | 2.377372725886059                      |                                                                                                                                                                                                                                                                                                                                                                                        |
| Category              | Term                                   | Genes                                                                                                                                                                                                                                                                                                                                                                                  |
| SP_PIR_KEYWORDS       | DNA binding                            | GLNG, SFSA, HUPA, ADIY, CRP, POLA, HHA, MPRA, HNS, CSPC, TORR, HELD, RHAR, MALI, FHLA, MELR, CYTR, GUTM, ASNC, NARL, TDCA, YAHB                                                                                                                                                                                                                                                        |
| SP_PIR_KEYWORDS       | activator                              | GLNG, HEPA, GADE, NHAR, CRP, CSPC, TORR, CHBR, RHAR, FHLA, MELR, QSEB, GUTM, ASNC, NARL, BASR, TDCA                                                                                                                                                                                                                                                                                    |
| SP_PIR_KEYWORDS       | dna-binding                            | SFSA, ADIY, HUPA, CRP, YIHW, HHA, CSPC, MALI, MFD, FABR, ZUR, NANR, NARL, UVRY, TDCA, DING, NHAR, FECI, HSLR, POLA, HNS, YPDB, NIKR, CHBR, ARGP, MELR, GUTM, BASR, YDCN, GADE, YIDF, YJJM, RHAR, MTLR, FHLA, CYTR, CPXR, ASNC, HFQ, GREB, SEQA, GLNG, HEPA, YBIH, UIDR, MPRA, TORR, HELD, YIDZ, BAER, DKSA, QSEB, GCVR, YAHB                                                           |
| SP_PIR_KEYWORDS       | transcription regulation               | GADE, ADIY, CRP, YIHW, YJJM, CSPC, RHAR, MALI, MTLR, FHLA, CYTR, FABR, CPXR, ASNC, ZUR, PHOU, NANR, NARL, UVRY, TDCA, GREB, HEPA, GLNG, NHAR, FECI, YBIH, MALY, UIDR, MPRA, HNS, YPDB, NIKR, TORR, CHBR, ARCB, YIDZ, ARGP, BAER, MELR, QSEB, GUTM, GCVR, YDCN, BASR, YAHB                                                                                                              |
| SP_PIR_KEYWORDS       | Transcription                          | GADE, ADIY, CRP, YIHW, YJJM, CSPC, RHAR, MALI, MTLR, MFD, FHLA, CYTR, FABR, CPXR, ASNC, ZUR, NANR, NARL, TDCA, UVRY, GREB, HEPA, GLNG, NHAR, FECI, YBIH, MALY, UIDR, MPRA, HNS, YPDB, NIKR, TORR, CHBR, ARCB, YIDZ, ARGP, BAER, MELR, QSEB, GUTM, GCVR, YDCN, BASR, YAHB                                                                                                               |
| GOTERM_BP_FAT         | GO:0045449~regulation of transcription | ADIY, CRP, YIHW, CSPC, ATOS, UMUD, MALI, MFD, FABR, ZUR, NANR, NARL, UVRY, TDCA, NHAR, FECI, MALY, HNS, YPDB, NIKR, CHBR, ARCB, ARGP, MELR, GUTM, BASR, YDCN, RNK, GADE, YJJM, RHAR, MTLR, FHLA, CYTR, CPXR, ASNC, HFQ, GLNL, GREB, GLNG, HEPA, YBIH, UIDR, MPRA, TORR, MOBA, YIDZ, BAER, QSEB, GCVR, YAHB                                                                             |
| GOTERM_MF_FAT         | GO:0003677~DNA binding                 | SFSA, ADIY, HUPA, CRP, XTHA, YIHW, HHA, CSPC, UMUD, MALI, MFD, FABR, RECR, ZUR, NANR, NARL, UVRY, TDCA, DING, NHAR, FECI, HSLR, UVRC, UVRB, POLA, HNS, YPDB, NIKR, CHBR, YBCK, ARGP, MELR, GUTM, MRR, YDCN, BASR, RNK, GADE, YIDF, YJJM, RHAR, MTLR, FHLA, CYTR, CPXR, ASNC, HFQ, GREB, SEQA, HEPA, GLNG, YBIH, UIDR, MPRA, TORR, HELD, YFBB, MOBA, YIDZ, BAER, DKSA, QSEB, GCVR, YAHB |

| Enrichment Score:     |                                                      |                                                                                  |
|-----------------------|------------------------------------------------------|----------------------------------------------------------------------------------|
| Annotation Cluster 42 | 2.345363719779025                                    |                                                                                  |
| Category              | Term                                                 | Genes                                                                            |
| GOTERM_BP_FAT         | GO:0046496~nicotinamide nucleotide metabolic process | FSAB, NADC, TPIA, TALB, NADE, MELA, GND, GALE, RPIB, RPIA, RFAD, ZWF             |
| GOTERM_BP_FAT         | GO:0006733~oxidoreduction coenzyme metabolic process | FSAB, NADC, TPIA, TALB, NADE, MELA, GND, RFAD, ZWF, RPIB, GALE, RPIA, UBIE, UBIF |
| GOTERM_BP_FAT         | GO:0006739~NADP metabolic process                    | FSAB, TPIA, TALB, GND, RPIB, RPIA, ZWF                                           |

| Enrichment Score:     |                       |                       |
|-----------------------|-----------------------|-----------------------|
| Annotation Cluster 43 | 2.325988930791967     |                       |
| Category              | Term                  | Genes                 |
| SP_PIR_KEYWORDS       | gluconate utilization | GNTF, GHRB, GND, IDNK |

| Enrichment Score:     |                                     |                                                            |
|-----------------------|-------------------------------------|------------------------------------------------------------|
| Annotation Cluster 44 | 2.2198916805541873                  |                                                            |
| Category              | Term                                | Genes                                                      |
| SP_PIR_KEYWORDS       | GTP binding                         | HSLU, FEOB, SELB, YIHA, PURA                               |
| SP_PIR_KEYWORDS       | gtp-binding                         | MOBA, MOAB, YJIA, FEOB, RIBA, SELB, YIHA, PURA, HYPB       |
| GOTERM_MF_FAT         | GO:0019001~guanylnucleotide binding | MOBA, YIGZ, MOAB, YJIA, FEOB, RIBA, SELB, YIHA, PURA, HYPB |

| Enrichment Score:     |                                                          |                                                          |
|-----------------------|----------------------------------------------------------|----------------------------------------------------------|
| Annotation Cluster 45 | 2.1960705749954004                                       |                                                          |
| Category              | Term                                                     | Genes                                                    |
| SP_PIR_KEYWORDS       | Molybdenum cofactor biosynthesis                         | MOAC, MOBA, MOAB, MOEA, MOG                              |
| GOTERM_BP_FAT         | GO:0042559~pteridine and derivative biosynthetic process | FOLP, MOAC, MOBA, MOAB, MOEA, NAPA, GLYA, MOG, FOLD      |
| GOTERM_BP_FAT         | GO:0019438~aromatic compound biosynthetic process        | FOLP, MOAC, MOBA, MOAB, MOEA, DXS, NAPA, GLYA, MOG, FOLD |

| Enrichment Score:     |                               |                              |
|-----------------------|-------------------------------|------------------------------|
| Annotation Cluster 46 | 2.0143435177013824            |                              |
| Category              | Term                          | Genes                        |
| SP_PIR_KEYWORDS       | intramolecular oxidoreductase | TPIA, MANA, UXAC, RPIB, RPIA |

|               |                                                                                        |                                    |
|---------------|----------------------------------------------------------------------------------------|------------------------------------|
|               | GO:0016861~intramolecular oxidoreductase activity, interconverting aldoses and ketoses | TPIA, MANA, FUCI, UXAC, RPIB, RPIA |
| GOTERM_MF_FAT |                                                                                        |                                    |

|               |                                                   |                                          |
|---------------|---------------------------------------------------|------------------------------------------|
|               | GO:0016860~intramolecular oxidoreductase activity | TPIA, MANA, FUCI, UXAC, DSBA, RPIB, RPIA |
| GOTERM_MF_FAT |                                                   |                                          |

|                       |                    |  |
|-----------------------|--------------------|--|
|                       | Enrichment Score:  |  |
| Annotation Cluster 47 | 1.9653252122747422 |  |

| Category        | Term       | Genes                                                     |
|-----------------|------------|-----------------------------------------------------------|
| SP_PIR_KEYWORDS | dna repair | YICR, HELD, UVRC, UMUD, MFD, UVRB, XTHA, RECR, POLA, DING |

|              |                                     |                       |
|--------------|-------------------------------------|-----------------------|
| KEGG_PATHWAY | ecd03420:Nucleotide excision repair | UVRC, MFD, UVRB, POLA |
|--------------|-------------------------------------|-----------------------|

|                 |            |                                               |
|-----------------|------------|-----------------------------------------------|
| SP_PIR_KEYWORDS | DNA damage | UVRC, UMUD, MFD, UVRB, XTHA, RECR, POLA, DING |
|-----------------|------------|-----------------------------------------------|

|                 |              |                  |
|-----------------|--------------|------------------|
| SP_PIR_KEYWORDS | sos response | UVRC, UMUD, UVRB |
|-----------------|--------------|------------------|

|               |                         |                        |
|---------------|-------------------------|------------------------|
|               | GO:0009432~SOS response | UVRC, UMUD, UVRB, DING |
| GOTERM_BP_FAT |                         |                        |

|               |                                        |                                                                             |
|---------------|----------------------------------------|-----------------------------------------------------------------------------|
|               | GO:0033554~cellular response to stress | YICR, UVRC, UVRB, XTHA, POLA, XSEB, HELD, UMUD, MFD, RECR, TRXB, DING, YJIY |
| GOTERM_BP_FAT |                                        |                                                                             |

|               |                                            |                                                                 |
|---------------|--------------------------------------------|-----------------------------------------------------------------|
|               | GO:0006974~response to DNA damage stimulus | YICR, HELD, UVRC, UMUD, MFD, UVRB, XTHA, RECR, POLA, XSEB, DING |
| GOTERM_BP_FAT |                                            |                                                                 |

|               |                       |                                                                 |
|---------------|-----------------------|-----------------------------------------------------------------|
|               | GO:0006281~DNA repair | YICR, HELD, UVRC, UMUD, MFD, UVRB, XTHA, RECR, POLA, XSEB, DING |
| GOTERM_BP_FAT |                       |                                                                 |

|               |                                  |                                                                                                                            |
|---------------|----------------------------------|----------------------------------------------------------------------------------------------------------------------------|
|               | GO:0006259~DNA metabolic process | YICR, UVRC, DNAC, UVRB, XTHA, POLA, XSEB, YBCK, HELD, YFBB, ARGP, UMUD, MFD, NRDF, RNHA, NRDE, RECR, MRR, DING, RDGC, SEQA |
| GOTERM_BP_FAT |                                  |                                                                                                                            |

|                       |                    |  |
|-----------------------|--------------------|--|
|                       | Enrichment Score:  |  |
| Annotation Cluster 48 | 1.8326642273483613 |  |

| Category      | Term                                                                             | Genes                                 |
|---------------|----------------------------------------------------------------------------------|---------------------------------------|
|               | GO:0034655~nucleobase, nucleoside, nucleotide and nucleic acid catabolic process | USHA, UDP, CPDB, DEOC, MTN, DEOB, ADE |
| GOTERM_BP_FAT |                                                                                  |                                       |

|                       |                    |  |
|-----------------------|--------------------|--|
|                       | Enrichment Score:  |  |
| Annotation Cluster 49 | 1.8187390260480976 |  |

| Category        | Term                             | Genes                                         |
|-----------------|----------------------------------|-----------------------------------------------|
|                 | cell wall biogenesis/degradation | LDCA, MTGA, MURF, MURI, DDLA, AMPD, SLT, NAGZ |
| SP_PIR_KEYWORDS |                                  |                                               |

|                 |                         |                                    |
|-----------------|-------------------------|------------------------------------|
|                 | peptidoglycan synthesis | LDCA, MTGA, MURF, MURI, DDLA, NAGZ |
| SP_PIR_KEYWORDS |                         |                                    |

|               |                                                   |                                                     |
|---------------|---------------------------------------------------|-----------------------------------------------------|
|               | GO:0006024~glycosaminoglycan biosynthetic process | LDCA, MTGA, MURF, MURI, GLMM, DDLA, SLT, NAGZ, MIPA |
| GOTERM_BP_FAT |                                                   |                                                     |

|                 |                                                      |                                                                       |
|-----------------|------------------------------------------------------|-----------------------------------------------------------------------|
| GOTERM_BP_FAT   | GO:0006023~aminoglycan biosynthetic process          | LDCA, MTGA, MURF, MURI, GLMM, DDLA, SLT, NAGZ, MIPA                   |
| GOTERM_BP_FAT   | GO:0009252~peptidoglycan biosynthetic process        | LDCA, MTGA, MURF, MURI, GLMM, DDLA, SLT, NAGZ, MIPA                   |
| SP_PIR_KEYWORDS | cell shape                                           | LDCA, MTGA, MURF, MURI, DDLA, NAGZ                                    |
| GOTERM_BP_FAT   | GO:0030203~glycosaminoglycan metabolic process       | LDCA, ANMK, MTGA, MURF, MPPA, MURI, GLMM, DDLA, AMPD, SLT, NAGZ, MIPA |
| GOTERM_BP_FAT   | GO:0044036~cell wall macromolecule metabolic process | LDCA, MTGA, MURF, MURI, YCFS, GLMM, DDLA, SLT, NAGZ, MIPA             |

|                       |                                      |                              |
|-----------------------|--------------------------------------|------------------------------|
| Enrichment Score:     |                                      |                              |
| Annotation Cluster 50 | 1.8098182404566971                   |                              |
| Category              | Term                                 | Genes                        |
| SP_PIR_KEYWORDS       | cytochrome c-type biogenesis         | CCMC, CCMD, CCMA, CCMB, CCME |
| GOTERM_MF_FAT         | GO:0015232~heme transporter activity | CCMC, CCMA, CCMB             |

|                       |                                                      |                              |
|-----------------------|------------------------------------------------------|------------------------------|
| Enrichment Score:     |                                                      |                              |
| Annotation Cluster 51 | 1.7688768560218913                                   |                              |
| Category              | Term                                                 | Genes                        |
| KEGG_PATHWAY          | ecq00250:Alanine, aspartate and glutamate metabolism | PURF, GLNA, ASNA, PURB, PURA |

|                       |                                                                       |                                                                                                                                   |
|-----------------------|-----------------------------------------------------------------------|-----------------------------------------------------------------------------------------------------------------------------------|
| Enrichment Score:     |                                                                       |                                                                                                                                   |
| Annotation Cluster 52 | 1.6892681225175121                                                    |                                                                                                                                   |
| Category              | Term                                                                  | Genes                                                                                                                             |
| GOTERM_MF_FAT         | GO:0042625~ATPase activity, coupled to transmembrane movement of ions | NIKD, NIKE, NIKB, MIND, NIKC, KDPA, NIKA, PSTB                                                                                    |
| GOTERM_CC_FAT         | GO:0019898~extrinsic to membrane                                      | FHUC, PGAA, FECE, HTPG, LPD, MIND, WBBK, WAAU, PSTB, FABI, GLTL, CCMA, MALK, GLNQ, NARH, NARG, NIKD, NIKE                         |
| INTERPRO              | IPR017871:ABC transporter, conserved site                             | FHUC, GLTL, YBBL, CCMA, SUFC, MALK, GLNQ, FECE, YBHF, NIKD, NIKE, PSTB                                                            |
| GOTERM_MF_FAT         | GO:0016887~ATPase activity                                            | FHUC, SUFC, FECE, HSLU, YBHF, MIND, PSTB, KDPA, GLTL, YBBL, CCMA, HELD, MALK, GLNQ, MFD, NIKD, YBHS, NIKE, NIKB, NIKC, DING, NIKA |

|                       |                    |  |
|-----------------------|--------------------|--|
| Enrichment Score:     |                    |  |
| Annotation Cluster 53 | 1.6646227403377125 |  |

| Category        | Term                         | Genes                                   |
|-----------------|------------------------------|-----------------------------------------|
|                 | ecw00300:Lysine biosynthesis |                                         |
| KEGG_PATHWAY    | ecw00300:Lysine biosynthesis | DAPB, MURF, DAPD, METL                  |
| SP_PIR_KEYWORDS | amino-acid biosynthesis      | DAPB, MALY, ASNA, MTN, FOLD, DAPD, METL |

| Enrichment Score:     |                                         |                                                          |
|-----------------------|-----------------------------------------|----------------------------------------------------------|
| Annotation Cluster 54 | 1.5812159588603019                      |                                                          |
| Category              | Term                                    | Genes                                                    |
|                       | ecd00020:Citrate cycle (TCA cycle)      |                                                          |
| KEGG_PATHWAY          | ecd00020:Citrate cycle (TCA cycle)      | SUCB, SUCC, FRDC, PCK, LPD, FUMB                         |
|                       | GO:0009060~aerobic respiration          |                                                          |
| GOTERM_BP_FAT         | GO:0009060~aerobic respiration          | SUCB, SUCC, ARCB, PPC, LPD, GLPD, NIKD, NIKE, UBIE, FUMB |
|                       | GO:0046356~acetyl-CoA catabolic process |                                                          |
| GOTERM_BP_FAT         | GO:0046356~acetyl-CoA catabolic process | SUCB, SUCC, PPC, LPD, FUMB                               |

| Enrichment Score:     |                          |                                                            |
|-----------------------|--------------------------|------------------------------------------------------------|
| Annotation Cluster 55 | 1.5361381339977807       |                                                            |
| Category              | Term                     | Genes                                                      |
|                       | cell cycle               |                                                            |
| SP_PIR_KEYWORDS       | cell cycle               | MURF, GROS, YIIU, MIND, MINE, YIHA, NAGZ, GROL, MINC       |
| GOTERM_BP_FAT         | GO:0007049~cell cycle    | MURF, GROS, YIIU, MIND, MINE, YIHA, GIDB, NAGZ, GROL, MINC |
|                       | septation                |                                                            |
| SP_PIR_KEYWORDS       | septation                | YIIU, MIND, YIHA, MINC                                     |
| GOTERM_BP_FAT         | GO:0051301~cell division | MURF, GROS, YIIU, MIND, MINE, YIHA, NAGZ, GROL, MINC       |
| GOTERM_BP_FAT         | GO:0000910~cytokinesis   | YIIU, MIND, YIHA, MINC                                     |

| Enrichment Score:     |                                                             |                                                      |
|-----------------------|-------------------------------------------------------------|------------------------------------------------------|
| Annotation Cluster 56 | 1.4775373890213004                                          |                                                      |
| Category              | Term                                                        | Genes                                                |
|                       | GO:0006542~glutamine biosynthetic process                   |                                                      |
| GOTERM_BP_FAT         | GO:0006542~glutamine biosynthetic process                   | GLNG, GLNH, GLNQ, GLNA, GLNP, GLNL                   |
|                       | GO:0009084~glutamine family amino acid biosynthetic process |                                                      |
| GOTERM_BP_FAT         | GO:0009084~glutamine family amino acid biosynthetic process | GLTK, GLNG, GLNH, GLTL, GLNQ, GLNA, GLTI, GLNP, GLNL |
|                       | ecy02020:Two-component system                               |                                                      |
| KEGG_PATHWAY          | ecy02020:Two-component system                               | GLNG, GLNA, GLNL                                     |

| Enrichment Score:     |                                       |                              |
|-----------------------|---------------------------------------|------------------------------|
| Annotation Cluster 57 | 1.4706269517216743                    |                              |
| Category              | Term                                  | Genes                        |
|                       | IPR013816:ATP-grasp fold, subdomain 2 |                              |
| INTERPRO              | IPR013816:ATP-grasp fold, subdomain 2 | PURT, SUCC, GSHB, DDLA, PURC |
| INTERPRO              | IPR011761:ATP-grasp fold              | PURT, SUCC, GSHB, DDLA       |



|                       |                                       |                                   |
|-----------------------|---------------------------------------|-----------------------------------|
|                       | Enrichment Score:                     |                                   |
| Annotation Cluster 58 | 1.4155748251734566                    |                                   |
| Category              | Term                                  | Genes                             |
| KEGG_PATHWAY          | ecs00010:Glycolysis / Gluconeogenesis | GALM, ENO, TPIA, GPMA, GLPX, PFKA |

|                       |                                      |                                                           |
|-----------------------|--------------------------------------|-----------------------------------------------------------|
|                       | Enrichment Score:                    |                                                           |
| Annotation Cluster 59 | 1.4107596819264208                   |                                                           |
| Category              | Term                                 | Genes                                                     |
| KEGG_PATHWAY          | ecc00970:Aminoacyl-tRNA biosynthesis | SELA, GLNS, GLYQ, ASNC, SERS                              |
| SP_PIR_KEYWORDS       | protein biosynthesis                 | PRFA, SELA, GLNS, GLYQ, ASNC, SELB, SERS                  |
| GOTERM_BP_FAT         | GO:0006399~tRNA metabolic process    | MIAA, YIHY, GLNS, RLUA, CCA, ASNA, GLYQ, QUEF, ASNC, SERS |

|                       |                                                     |                                                                                                                                                                                         |
|-----------------------|-----------------------------------------------------|-----------------------------------------------------------------------------------------------------------------------------------------------------------------------------------------|
|                       | Enrichment Score:                                   |                                                                                                                                                                                         |
| Annotation Cluster 60 | 1.3959919806272567                                  |                                                                                                                                                                                         |
| Category              | Term                                                | Genes                                                                                                                                                                                   |
| GOTERM_BP_FAT         | GO:0046394~carboxylic acid biosynthetic process     | SERS, METL, FABI, GLTK, GLTL, FABG, GLNQ, GLTI, ASNA, FABR, GLNP, ASNC, GLNL, GLNG, GLNH, KDSA, MALY, GLNA, FABD, DKGB, DKGA, GLYA, KDSB, ACPP, DAPD, DAPB, FOLP, BIOH, GMHB, MTN, FOLD |
| GOTERM_BP_FAT         | GO:0009309~amine biosynthetic process               | GLNG, GLNH, MALY, GLNA, GLYA, SERS, DAPD, METL, DAPB, SPEB, GLTK, GLTL, FOLP, GSP, GLNQ, GLTI, GMHB, ASNA, GLNP, MTN, ASNC, FOLD, GLNL                                                  |
| GOTERM_BP_FAT         | GO:0008652~cellular amino acid biosynthetic process | GLNG, GLNH, MALY, GLNA, GLYA, SERS, DAPD, METL, DAPB, GLTK, GLTL, FOLP, GLNQ, GLTI, GMHB, ASNA, GLNP, MTN, ASNC, FOLD, GLNL                                                             |

|                       |                                                                                     |                                                                                                               |
|-----------------------|-------------------------------------------------------------------------------------|---------------------------------------------------------------------------------------------------------------|
|                       | Enrichment Score:                                                                   |                                                                                                               |
| Annotation Cluster 61 | 1.3872852196421224                                                                  |                                                                                                               |
| Category              | Term                                                                                | Genes                                                                                                         |
| SP_PIR_KEYWORDS       | purine nucleotide biosynthesis                                                      | PURH, PURT, PURN, PURC, PURB, PURA                                                                            |
| SP_PIR_KEYWORDS       | purine biosynthesis                                                                 | PURH, PURT, PURF, PURN, PURC, PURB, FOLD, PURA                                                                |
| GOTERM_BP_FAT         | GO:0034654~nucleobase, nucleoside, nucleotide and nucleic acid biosynthetic process | PURH, PURT, NADC, PURF, UPP, NADE, MELA, PURN, HPT, QUEF, PURC, RFAD, PURB, PURA, GRXC, GALE, PANE, FOLD, ADD |

|                       |                    |       |
|-----------------------|--------------------|-------|
|                       | Enrichment Score:  |       |
| Annotation Cluster 62 | 1.3787749734931467 |       |
| Category              | Term               | Genes |

|                       |                                                                                               |                                                                                      |
|-----------------------|-----------------------------------------------------------------------------------------------|--------------------------------------------------------------------------------------|
| GOTERM_BP_FAT         | GO:0015768~maltose transport                                                                  | MALK, LAMB, MALE                                                                     |
| GOTERM_BP_FAT         | GO:0015766~disaccharide transport                                                             | MALK, LAMB, MALE                                                                     |
| GOTERM_BP_FAT         | GO:0042946~glucoside transport                                                                | MALK, LAMB, MALE                                                                     |
| Enrichment Score:     |                                                                                               |                                                                                      |
| Annotation Cluster 63 | 1.377420886422273                                                                             |                                                                                      |
| Category              | Term                                                                                          | Genes                                                                                |
| KEGG_PATHWAY          | eco00760:Nicotinate and nicotinamide metabolism                                               | USHA, NADC, NADE, DEOD, NADK                                                         |
| Enrichment Score:     |                                                                                               |                                                                                      |
| Annotation Cluster 64 | 1.3558788095008694                                                                            |                                                                                      |
| Category              | Term                                                                                          | Genes                                                                                |
| SP_PIR_KEYWORDS       | Flavoprotein                                                                                  | PDXH, NFSB, HCR, AHPF, LPD, GLPD, HMP, MDAB, YQCA, NIRB, GOR, TRXB, NEMA, AZOR, UBIF |
| SP_PIR_KEYWORDS       | FAD                                                                                           | NIRB, HCR, GOR, AHPF, LPD, GLPD, HMP, TRXB, UBIF                                     |
| GOTERM_MF_FAT         | GO:0016667~oxidoreductase activity, acting on sulfur group of donors                          | GRXB, GRXC, GRXD, GOR, AHPF, DSBA, DSBB, LPD, TRXB                                   |
| INTERPRO              | IPR001327:Pyridine nucleotide-disulphide oxidoreductase, NAD-binding region                   | NIRB, GOR, AHPF, LPD, TRXB                                                           |
| GOTERM_MF_FAT         | GO:0016668~oxidoreductase activity, acting on sulfur group of donors, NAD or NADP as acceptor | GOR, LPD, TRXB                                                                       |
| UP_SEQ_FEATURE        | nucleotide phosphate-binding region:FAD                                                       | NIRB, GOR, AHPF, LPD, GLPD, HMP, TRXB                                                |
| INTERPRO              | IPR013027:FAD-dependent pyridine nucleotide-disulphide oxidoreductase                         | NIRB, GOR, AHPF, LPD, TRXB                                                           |
| GOTERM_MF_FAT         | GO:0016651~oxidoreductase activity, acting on NADH or NADPH                                   | GOR, AHPF, LPD, TRXB, MDAB, QUEF, AZOR, HYFG                                         |
| GOTERM_MF_FAT         | GO:0050660~FAD binding                                                                        | NIRB, GOR, AHPF, LPD, TRXB, UBIF                                                     |
