# Supplementary material for: Central role for RNase YbeY in Hfq-dependent and Hfq-independent small-RNA regulation in bacteria
Source: PubMed Central journal article supplement (PMC3933206; doi:10.1186/1471-2164-15-121), 2014-02-11
Supplement: 1471-2164-15-121-S8.pdf [file 1471-2164-15-121-S8.pdf]

**Supplemental Table 8. Functional clusters of genes differentially regulated upon HU exposure only in YbeY's absence**

| Enrichment Score:    |                     |                                                                                                                                                                                                                                                                                                                                                                                                                                                                                                                                                                                                                                                                                                                                                                                                                                                                                                                                                                                                                                                                                                                                                                                                                                                                        |
|----------------------|---------------------|------------------------------------------------------------------------------------------------------------------------------------------------------------------------------------------------------------------------------------------------------------------------------------------------------------------------------------------------------------------------------------------------------------------------------------------------------------------------------------------------------------------------------------------------------------------------------------------------------------------------------------------------------------------------------------------------------------------------------------------------------------------------------------------------------------------------------------------------------------------------------------------------------------------------------------------------------------------------------------------------------------------------------------------------------------------------------------------------------------------------------------------------------------------------------------------------------------------------------------------------------------------------|
| Annotation Cluster 1 | 39.31374938791406   |                                                                                                                                                                                                                                                                                                                                                                                                                                                                                                                                                                                                                                                                                                                                                                                                                                                                                                                                                                                                                                                                                                                                                                                                                                                                        |
| Category             | Term                | Genes                                                                                                                                                                                                                                                                                                                                                                                                                                                                                                                                                                                                                                                                                                                                                                                                                                                                                                                                                                                                                                                                                                                                                                                                                                                                  |
|                      |                     | YDJZ, QSEC, CHAA, YOHD, YQAA, PITB, TRKG, YJGN, YNAI, YPHD, YBBM, EAMB, MNTH, MRCA, SETB, ACRB, NIKE, YOAE, YGBN, PANF, ACRD, YEDV, SRLE, YGDD, YAJR, GNTU, RHTA, SRLA, WBBK, YHHT, PLDB, YEDE, SANA, YBJG, YHHQ, MRDB, YGCS, ARGK, RSXD, RSXC, RSXB, YCCS, RSXA, MDOB, YDDG, YDDA, YNFA, FRUA, YNFH, KDGT, PTSG, LLDP, YRFF, YQJF, MDOH, MANY, MANX, YHAI, SETA, MANZ, CMR, BTUD, YJHF, BTUC, YCIS, PHNC, EMRB, DGOT, WZC, CCMD, SAPF, YCIB, YCIC, YTFL, SAPD, YCAM, PPID, SAPB, SAPC, TORS, CYOA, CCME, YCFZ, YIHN, YIHO, YIFK, NARQ, TDCC, FRDD, DCUC, FRDC, FRWC, NARX, YHBE, YIHP, AER, MGLC, DCUS, ZNTA, SSUC, MDTG, YIHG, MDTH, MDTK, DINF, MDTI, MDTJ, LSRD, CBRB, GSPO, GLPA, GSPK, YMFA, GLPG, XYLE, SPPA, XYLG, YIHY, CYDC, CYDD, MODB, LORD, LOLC, MODF, TEHA, YDGI, LOLE, YDGK, TOLR, TOLQ, YIJP, YECN, YIDK, YFCJ, DJLA, FTSN, YNJC, FRYC, MIND, YDHU, YDHC, YNJF, SBMA, YJEH, NFRB, YIJD, YBHS, CREC, YBHQ, DMSD, DMSC, YQFA, RFAL, DSBB, YBAL, SECY, AGAC, AGAD, YGJV, BAES, YCEJ, KEFA, YFAV, YBIP, YHJV, DEDA, HISM, YBIR, KEFB                                                                                                                                                                                                                      |
| SP_PIR_KEYWORDS      | cell inner membrane |                                                                                                                                                                                                                                                                                                                                                                                                                                                                                                                                                                                                                                                                                                                                                                                                                                                                                                                                                                                                                                                                                                                                                                                                                                                                        |
|                      |                     | YDJZ, YDJX, YQAA, TRKG, WZA, YNAI, YBBM, EAMB, ACRB, NIKE, YGBN, YOAE, PANF, ACRD, SRLE, GNTU, SRLA, RHTA, PLDB, PLDA, SANA, YGCG, YGCS, ARGK, KDGT, PTSG, LLDP, MANY, MANX, YHAI, MANZ, YCIS, PHNC, PHNE, WZC, DGOT, SAPF, YCIB, YCIC, SAPD, SAPB, SAPC, CYOA, YCFZ, YIHN, MDTP, YIHO, YIFK, NARQ, FRDD, FRDC, NARX, YHBE, YIHP, AER, SSUC, YIHG, MDTG, SLYB, MDTH, MDTK, DINF, MDTI, MDTJ, LSRD, CBRB, GSPO, GSPK, YMFA, YIHY, MODB, LORD, LOLC, YDGI, TEHA, MODF, LOLE, YDGK, YIJP, YIDK, APBE, DJLA, FTSN, YNJC, YDHU, YDHC, SBMA, YNJF, NFRB, NFRA, YIJD, YBHS, CREC, YBHQ, YQFA, RFAL, BAES, YCEJ, MLTB, MLTC, YBIP, YHDV, YBIR, QSEC, YOHD, CHAA, PITB, YJGN, YPHD, MRCA, MNTH, SETB, SPR, MIPA, YEDV, YEDQ, YAJR, YGDD, WBBK, YHHT, YNIB, YBJE, YEDE, YBJG, YHHQ, MRDB, RSXD, RSXC, RSXB, YCCS, RSXA, MDOC, MDOB, YDDG, YDDA, YNFA, FRUA, YNFE, YNFF, YNFH, YDDW, YRFF, YQJF, MDOH, YFGH, YJIK, SETA, CMR, BTUD, BTUC, YJHF, YDEE, EMRB, CCMD, YTFL, YCAM, PPID, TORS, OMPW, YGFQ, LEUE, YAHG, FLU, YHFK, CCME, YEAJ, TDCC, DCUC, FRWC, MGLC, DCUS, ZNTA, GLPA, GLPG, XYLE, SPPA, XYLG, YJBF, CYDC, CYDD, TOLR, TOLQ, YRAJ, YECN, YNBD, YFCJ, FRYC, MIND, YRAQ, YJEH, DMSD, DMSC, DSBB, YBAL, SECY, AGAC, AGAD, YGJV, YEAY, KEFA, YFAV, YHJV, HISM, DEDA, KEFB |
| SP_PIR_KEYWORDS      | cell membrane       |                                                                                                                                                                                                                                                                                                                                                                                                                                                                                                                                                                                                                                                                                                                                                                                                                                                                                                                                                                                                                                                                                                                                                                                                                                                                        |
| Enrichment Score:    |                     |                                                                                                                                                                                                                                                                                                                                                                                                                                                                                                                                                                                                                                                                                                                                                                                                                                                                                                                                                                                                                                                                                                                                                                                                                                                                        |
| Annotation Cluster 2 | 13.424449217862357  |                                                                                                                                                                                                                                                                                                                                                                                                                                                                                                                                                                                                                                                                                                                                                                                                                                                                                                                                                                                                                                                                                                                                                                                                                                                                        |
| Category             | Term                | Genes                                                                                                                                                                                                                                                                                                                                                                                                                                                                                                                                                                                                                                                                                                                                                                                                                                                                                                                                                                                                                                                                                                                                                                                                                                                                  |
|                      |                     | MANZ, CHBB, CHBA, NARQ, TDCD, PYKF, SRLE, NARX, SRLA, SRLB, FRUA, FRYC, PTSI, PTSG, TDK, TORS, COAA, PRKB, PYKA, MANY, CREC, MANX, PFKA, UDK                                                                                                                                                                                                                                                                                                                                                                                                                                                                                                                                                                                                                                                                                                                                                                                                                                                                                                                                                                                                                                                                                                                           |
| SP_PIR_KEYWORDS      | phosphotransferase  | QSEC, NARQ, NARX, USPA, FRUA, FRYC, PTSI, CYAA, PTSG, DCUR, DCUS, ZNTA, FIMZ, CPXR, NARL, TDCB, CREC, MANX, CHBB, YEDV, CHBA, SRLE, SRLA, WZC, SRLB, NPR, BAES, TORS                                                                                                                                                                                                                                                                                                                                                                                                                                                                                                                                                                                                                                                                                                                                                                                                                                                                                                                                                                                                                                                                                                   |
| SP_PIR_KEYWORDS      | phosphoprotein      |                                                                                                                                                                                                                                                                                                                                                                                                                                                                                                                                                                                                                                                                                                                                                                                                                                                                                                                                                                                                                                                                                                                                                                                                                                                                        |

|                      |                                                                          |                                                                                                                                                                                                                                                                                          |
|----------------------|--------------------------------------------------------------------------|------------------------------------------------------------------------------------------------------------------------------------------------------------------------------------------------------------------------------------------------------------------------------------------|
| SP_PIR_KEYWORDS      | kinase                                                                   | QSEC, NARQ, TDCD, FRWD, NARX, YGGC, FRUA, NAGK, PTSI, PTSG, DCUS, FRLD, RFAP, PYKA, MANX, CREC, YEDV, CHBB, PYKF, SRLE, WZC, SRLB, YBCL, NPR, TDK, YGCE, BAES, TORS, COAA, ARGK, PRKB, SELD, PFKA, UDK                                                                                   |
| Annotation Cluster 3 | Enrichment Score:<br>7.56255043486997                                    |                                                                                                                                                                                                                                                                                          |
| Category             | Term                                                                     | Genes                                                                                                                                                                                                                                                                                    |
| SP_PIR_KEYWORDS      | phosphotransferase                                                       | MANZ, CHBB, CHBA, NARQ, TDCD, PYKF, SRLE, NARX, SRLA, SRLB, FRUA, FRYC, PTSI, PTSG, TDK, TORS, COAA, PRKB, PYKA, MANY, CREC, MANX, PFKA, UDK                                                                                                                                             |
| KEGG_PATHWAY         | ecd00051:Fructose and mannose metabolism                                 | MANZ, TPIA, MANA, SRLE, GMD, FBP, SRLA, FRUA, SRLB, FCL, CPSB, MANY, MANX, PFKA                                                                                                                                                                                                          |
| SP_PIR_KEYWORDS      | sugar transport                                                          | FRWC, FRWD, FRUA, FRYC, PTSI, KDGT, WZA, MGLC, PTSG, YPHD, SETB, MANY, MANX, CHBB, MANZ, SETA, CHBA, SRLE, GNTU, SRLA, SRLB, AGAC, AGAD, XYLE, XYLG                                                                                                                                      |
| GOTERM_BP_FAT        | GO:0046377~colanic acid metabolic process                                | RCSA, FCL, WZA, WCAI, WZB, MANA, GMD, GALU, CPSB, WCAA, WZC, WCAB                                                                                                                                                                                                                        |
| KEGG_PATHWAY         | ecd00520:Amino sugar and nucleotide sugar metabolism                     | MANZ, FCL, PTSG, MANA, GMD, GALU, CPSB, NAGK, MANY, MANX, NAGZ                                                                                                                                                                                                                           |
| GOTERM_BP_FAT        | GO:0009401~phosphoenolpyruvate-dependent sugar phosphotransferase system | CHBB, MANZ, CHBA, FRWC, SRLE, FRWD, SRLA, SRLB, FRUA, AGAC, FRYC, AGAD, PTSI, PTSG, NPR, SRLR, GUTM, MANY, MANX                                                                                                                                                                          |
| Annotation Cluster 4 | Enrichment Score:<br>7.1384733842949135                                  |                                                                                                                                                                                                                                                                                          |
| Category             | Term                                                                     | Genes                                                                                                                                                                                                                                                                                    |
| GOTERM_BP_FAT        | GO:0009061~anaerobic respiration                                         | TDCE, NARQ, FRDD, PYKF, FRDC, GLPA, FRDB, NARX, NAPB, HYFG, YNFH, ACEE, DCUR, DCUS, TORS, YFID, LLDD, NIKE, PFLA, NARL, PYKA, PFLC, DMSC                                                                                                                                                 |
| GOTERM_BP_FAT        | GO:0045333~cellular respiration                                          | TDCE, NARQ, FRDD, FRDC, FRDB, NARX, NAPB, YDHU, YNFH, ACEE, MNGR, DCUR, DCUS, YFID, LLDD, NIKE, PFLA, MQO, NARL, PYKA, PFLC, DMSC, PYKF, GLPA, UBIX, HYFG, YCEJ, TORS, CYOA                                                                                                              |
| GOTERM_BP_FAT        | GO:0006091~generation of precursor metabolites and energy                | TDCE, NARQ, TPIA, FRDD, FRDC, FRDB, NARX, NAPB, YNFG, YDHU, YNFH, ACEE, MNGR, DCUR, DCUS, ZNTA, YFID, LLDD, PFLA, NIKE, MQO, NARL, PYKA, PFLC, DMSC, YHJA, PYKF, GLPA, UBIX, DSBB, HYFG, GRXD, YCEJ, TORS, YGFS, HCAC, RSXD, TRXC, YGCR, RSXC, RSXB, CYOA, RSXA, PFKA                    |
| Annotation Cluster 5 | Enrichment Score:<br>6.64474218328045                                    |                                                                                                                                                                                                                                                                                          |
| Category             | Term                                                                     | Genes                                                                                                                                                                                                                                                                                    |
| SP_PIR_KEYWORDS      | lipopolysaccharide biosynthesis                                          | RFAG, YIJP, KDSA, RFAL, GMD, WCAA, RFBA, WCAB, RFBB, RFAC, RFBC, WBBK, RFBD, RFAB, FCL, WCAI, RFAP, CPSB, RFAS                                                                                                                                                                           |
| GOTERM_BP_FAT        | GO:0016051~carbohydrate biosynthetic process                             | MDOC, MDOB, TPIA, MDOG, MANA, TDCG, RFBA, RFBB, RFBC, HIPA, RFBD, HIPB, LDCA, WZA, FCL, WZB, NAGC, MRCA, RFAP, MDOH, RFAS, MIPA, RFAG, RCSA, KDSA, RFAL, YEDQ, GMD, GALU, FBP, WCAA, WZC, DDLA, WCAB, RFAC, DACB, AGAD, WBBK, RFAB, WCAI, YBJG, MURF, AMPC, MLTB, AMIB, CPSB, MLTC, NAGZ |

|                      |                                                |                                                                                                                                                                                                                                                            |
|----------------------|------------------------------------------------|------------------------------------------------------------------------------------------------------------------------------------------------------------------------------------------------------------------------------------------------------------|
| GOTERM_BP_FAT        | GO:0000271~polysaccharide biosynthetic process | MDOC, MDOB, MDOG, MANA, RFBA, RFBB, RFBC, HIPA, RFB, HIPB, LDCA, WZA, FCL, WZB, MRCA, RFAP, MDOH, RFAS, MIPA, RCSA, RFAG, KDSA, RFAL, YEDQ, GMD, GALU, WCAA, WZC, DDLA, WCAB, RFAC, DACB, WBBK, RFAB, WCAI, YBJG, MURF, AMPC, MLTB, AMIB, CPSB, MLTC, NAGZ |
| Annotation Cluster 6 | Enrichment Score: 6.16768996954552             |                                                                                                                                                                                                                                                            |
| Category             | Term                                           | Genes                                                                                                                                                                                                                                                      |
| SP_PIR_KEYWORDS      | ATP                                            | BTUD, PHNC, SRMB, ASNS, MIND, NAGK, YNJD, SERS, ARGS, SAPF, HELD, MURF, XYL, SAPD, TDK, CYDC, CYDD, LORD, NIKE, MODF, PFKA                                                                                                                                 |
| SP_PIR_KEYWORDS      | nucleotide binding                             | BTUD, PHNC, SRMB, MIND, NAGK, YNJD, OBGE, SAPF, HELD, MURF, XYL, SAPD, TDK, CYDC, CYDD, NFRA, LORD, YCHF, NIKE, MODF                                                                                                                                       |
| SP_PIR_KEYWORDS      | P-loop                                         | BTUD, PHNC, SRMB, MIND, NAGK, YNJD, OBGE, SAPF, HELD, MURF, XYL, SAPD, TDK, CYDC, CYDD, NFRA, LORD, YCHF, NIKE, MODF                                                                                                                                       |
| KEGG_PATHWAY         | eco02010:ABC transporters                      | YDDA, MGLC, YGIS, SSUC, NIKE, YBHS, BTUD, BTUC, LSRD, PHNC, PHNE, PHND, SAPF, SAPD, XYL, CYDC, SAPB, CYDD, SAPC, MODB, LORD, LOLC, MODF, LOLE, HISM, POTD                                                                                                  |
| GOTERM_CC_FAT        | GO:0019898~extrinsic to membrane               | BTUD, BTUC, GLPA, PHNC, MIND, WBBK, PLDB, SAPF, XYL, SAPD, ARGK, LORD, FLU, RSXC, NIKE, RSXB, MODF, DMSD, MANX                                                                                                                                             |
| INTERPRO             | IPR017871:ABC transporter, conserved site      | BTUD, BTUC, YDDA, PHNC, RFBB, YNJD, YBBL, SAPF, XYL, SAPD, CYDC, CYDD, LORD, NIKE, MODF                                                                                                                                                                    |
| GOTERM_MF_FAT        | GO:0042623~ATPase activity, coupled            | BTUD, BTUC, YDDA, SRMB, PHNC, MIND, MGLC, SBMA, HELD, XYL, CYDC, CYDD, ZNTA, RHLB, RECQ, YBHS, NIKE                                                                                                                                                        |
| UP_SEQ_FEATURE       | nucleotide phosphate-binding region:ATP        | YDDA, SRMB, YGGC, NAGK, MIND, YNJD, SERS, YBBL, YGGR, RECQ, NIKE, BTUD, BTUC, PHNC, DDLA, TYRR, GUAA, SAPF, HELD, TDK, SAPD, XYL, MURF, CYDC, RIMK, CYDD, MUTS, RHLB, COAA, ARGK, LORD, YGFQ, PRKB, SELD, PFKA, UDK                                        |
| INTERPRO             | IPR003593:ATPase, AAA+ type, core              | BTUD, BTUC, YDDA, PHNC, TYRR, RFBB, YNJD, YBBL, SAPF, XYL, SAPD, CYDC, CYDD, YGGR, LORD, NIKE, MODF, FFH                                                                                                                                                   |
| UP_SEQ_FEATURE       | domain:ABC transmembrane type-1                | YDDA, CYDC, SAPB, CYDD, SSUC, SAPC, MODB, HISM                                                                                                                                                                                                             |
| GOTERM_MF_FAT        | GO:0016887~ATPase activity                     | BTUD, BTUC, YDDA, PHNC, SRMB, RFBB, MIND, YNJD, YBBL, MGLC, SAPF, SBMA, HELD, XYL, SAPD, CYDC, CYDD, ZNTA, RHLB, RECQ, LORD, NIKE, YBHS, MODF                                                                                                              |
| SMART                | SM00382:AAA                                    | BTUD, BTUC, YDDA, PHNC, TYRR, RFBB, YNJD, YBBL, SAPF, XYL, SAPD, CYDC, CYDD, YGGR, LORD, NIKE, MODF, FFH                                                                                                                                                   |
| Annotation Cluster 7 | Enrichment Score: 5.248808349173658            |                                                                                                                                                                                                                                                            |
| Category             | Term                                           | Genes                                                                                                                                                                                                                                                      |
| SP_PIR_KEYWORDS      | DNA binding                                    | YCJW, HUPA, ADIY, SFSB, DEOR, CYNR, CSPF, YCJZ, ICLR, HIPB, METJ, KDGR, MNGR, NAGC, FADR, MALI, CYTR, SRLR, SLYA, NARL, RCSA, RPOD, LEXA, POLA, LRP, GLPG, HELD, LYSR, PHNF, YCGE, IHFA, GUTM, YCIM                                                        |
| SP_PIR_KEYWORDS      | repressor                                      | ENVR, YFET, DEOR, CYNR, ICLR, HIPB, METJ, MNGR, NAGC, FADR, MALI, ULAR, CYTR, SRLR, SLYA, NARL, MNTR, RPSD, LSRR, GNTR, YEBK, LEXA, TYRR, CHBR, PAAX, LYSR                                                                                                 |

|                 |             |                                                                                                                                                                                                                                                                                                                                                                                                                             |
|-----------------|-------------|-----------------------------------------------------------------------------------------------------------------------------------------------------------------------------------------------------------------------------------------------------------------------------------------------------------------------------------------------------------------------------------------------------------------------------|
| SP_PIR_KEYWORDS | dna-binding | YCJW, YFET, HUPA, ADIY, SFSB, CYNR, CSPF, ICLR, YCJZ, YEIE, METJ, DCUR, MNGR, MALI, FIMZ, SRLR, RECQ, SLYA, NARL, MNTR, RCSA, GNTR, LEXA, POLA, TYRR, GLCC, LRP, CHBR, YLBG, PAAX, LYSR, YCGE, GUTM, YDCN, EUTR, CEDA, YBJK, YJIE, ENVR, YJJQ, YAIW, DEOR, YIDL, YGGD, HIPA, HIPB, OBGE, YBDO, YDHB, KDGR, YJIR, NAGC, FADR, ULAR, CYTR, CPXR, LSRR, RPOD, YBAQ, YDIP, YEBK, INSG, ABGR, HELD, PHNF, IHFA, MUTS, ALPA, YFAX |
|-----------------|-------------|-----------------------------------------------------------------------------------------------------------------------------------------------------------------------------------------------------------------------------------------------------------------------------------------------------------------------------------------------------------------------------------------------------------------------------|

|                 |               |                                                                                                                                                                                                                                                                                                                                                                      |
|-----------------|---------------|----------------------------------------------------------------------------------------------------------------------------------------------------------------------------------------------------------------------------------------------------------------------------------------------------------------------------------------------------------------------|
| SP_PIR_KEYWORDS | Transcription | YCJW, YFET, ADIY, SFSB, CYNR, CSPF, ICLR, YCJZ, YEIE, METJ, DCUR, MNGR, MALI, FIMZ, SRLR, SLYA, NARL, MNTR, RCSA, GNTR, LEXA, TYRR, GLCC, LRP, RSD, CHBR, PAAX, LYSR, YCGE, GUTM, YDCN, EUTR, YBJK, YJIE, ENVR, YJJQ, DEOR, YIDL, HIPB, YDHB, YBDO, KDGR, NAGC, YJIR, FADR, ULAR, CYTR, CPXR, LSRR, RPSD, RPOD, YDIP, YEBK, YBAQ, RPOA, ABGR, PHNF, IHFA, ALPA, YFAX |
|-----------------|---------------|----------------------------------------------------------------------------------------------------------------------------------------------------------------------------------------------------------------------------------------------------------------------------------------------------------------------------------------------------------------------|

|                 |                          |                                                                                                                                                                                                                                                                                                                                                                |
|-----------------|--------------------------|----------------------------------------------------------------------------------------------------------------------------------------------------------------------------------------------------------------------------------------------------------------------------------------------------------------------------------------------------------------|
| SP_PIR_KEYWORDS | transcription regulation | YCJW, YFET, ADIY, SFSB, CYNR, CSPF, ICLR, YCJZ, YEIE, METJ, DCUR, MNGR, MALI, FIMZ, SRLR, SLYA, NARL, MNTR, RCSA, GNTR, LEXA, TYRR, GLCC, LRP, RSD, CHBR, PAAX, LYSR, YCGE, GUTM, YDCN, EUTR, YBJK, YJIE, ENVR, YJJQ, DEOR, YIDL, HIPB, YDHB, YBDO, KDGR, NAGC, YJIR, FADR, ULAR, CYTR, CPXR, LSRR, RPSD, RPOD, YDIP, YEBK, YBAQ, ABGR, PHNF, IHFA, ALPA, YFAX |
|-----------------|--------------------------|----------------------------------------------------------------------------------------------------------------------------------------------------------------------------------------------------------------------------------------------------------------------------------------------------------------------------------------------------------------|

Enrichment Score:  
Annotation Cluster 8 4.8108101673059895

| Category        | Term          | Genes                                                                                                                                                                                                                                                                                                                                                                            |
|-----------------|---------------|----------------------------------------------------------------------------------------------------------------------------------------------------------------------------------------------------------------------------------------------------------------------------------------------------------------------------------------------------------------------------------|
| SP_PIR_KEYWORDS | metal-binding | FRDB, TDCG, SCPA, YDJJ, ACEE, ZNTA, YPHC, GLTD, PFLA, YGBM, PFLC, CUTA, YACG, YPDE, CHBF, YCGM, HYFG, PLDA, RIMK, RSXC, TRXC, RSXB, YBJI, PFKA, PTRA, TYNA, MANA, YBHJ, YDHY, RFBA, YJJN, GLOA, NAPB, YNFE, NAGK, YNFF, YDHX, YNFG, PTSI, NUDF, SPEA, NUDL, DGOD, YCHF, YIDA, PYKA, YHJA, RIHB, YGJD, PYKF, VSR, FBP, DDLA, YCAL, YCEJ, YGFS, HCAC, YDEM, MUTY, YCIM, CCME, YGFT |

|               |                           |                                                                                                                                                                                                                                                                                                                                                                                                                                                                                                                                                    |
|---------------|---------------------------|----------------------------------------------------------------------------------------------------------------------------------------------------------------------------------------------------------------------------------------------------------------------------------------------------------------------------------------------------------------------------------------------------------------------------------------------------------------------------------------------------------------------------------------------------|
| GOTERM_MF_FAT | GO:0043169~cation binding | CHAA, FRDB, TDCG, SCPA, EXOX, TRKG, YDJJ, ACEE, ZNTA, MNTH, YPHC, GLTD, PFLA, NIKE, MDTK, CUTC, PFLC, YGBM, MNTR, PANF, CUTA, YIIM, RECJ, YACG, CHBF, YCGM, HYFG, TORZ, PYRE, PLDA, RIMK, MODB, RSXC, TRXC, RSXB, MODF, YBJI, PFKA, PTRA, TYNA, MANA, YBHJ, YIDK, YDHY, RFBA, YJJN, NAPB, EBGA, GLOA, NAGK, YNFE, YNFF, YDHX, YNFG, PTSI, NUDF, SPEA, YDDW, NUDK, NUDL, DGOD, YCHF, PYKA, YIDA, YGGX, YHJA, BTUE, RIHB, YGJD, PYKF, YHJJ, GALU, VSR, FBP, DDLA, YCAL, YCEJ, YGFS, HCAC, BGLA, YDEM, SELD, CYOA, KEFA, MUTY, CCME, YCIM, YGFT, KEFB |
|---------------|---------------------------|----------------------------------------------------------------------------------------------------------------------------------------------------------------------------------------------------------------------------------------------------------------------------------------------------------------------------------------------------------------------------------------------------------------------------------------------------------------------------------------------------------------------------------------------------|

Enrichment Score:  
Annotation Cluster 9 4.572412933376043

| Category        | Term                              | Genes                                                                                                     |
|-----------------|-----------------------------------|-----------------------------------------------------------------------------------------------------------|
| GOTERM_BP_FAT   | GO:0042493~response to drug       | CMR, ENVR, YAJR, EMRB, DACB, YGEA, SBMA, SANA, YBBM, AMPC, MRCA, MDTG, ACRB, MDTK, TEHA, DINF, TEHB, ACRD |
| SP_PIR_KEYWORDS | antibiotic resistance             | MDTP, RPSD, EMRB, DACB, RPLV, YBJG, AMPC, MRCA, MDTG, MDTH, TEHA, MDTK, TEHB                              |
| GOTERM_BP_FAT   | GO:0046677~response to antibiotic | MDTP, RPSD, EMRB, DACB, RPLV, YBJG, AMPC, MRCA, MDTG, MDTH, TEHA, MDTK, TEHB                              |

| Enrichment Score:                       |                                                           |                                                                                                                                                                                                                                                                       |
|-----------------------------------------|-----------------------------------------------------------|-----------------------------------------------------------------------------------------------------------------------------------------------------------------------------------------------------------------------------------------------------------------------|
| Annotation Cluster 10 4.358784751883762 |                                                           |                                                                                                                                                                                                                                                                       |
| Category                                | Term                                                      | Genes                                                                                                                                                                                                                                                                 |
| SP_PIR_KEYWORDS                         | electron transport                                        | YHJA, FRDB, DSBB, NAPB, YNFG, GRXD, YCEJ, HCAC, YGFS, RSXD, TRXC, RSXC, YGCR, CYOA, RSXB, RSXA                                                                                                                                                                        |
| GOTERM_BP_FAT                           | GO:0006091~generation of precursor metabolites and energy | TDCE, NARQ, TPIA, FRDD, FRDC, FRDB, NARX, NAPB, YNFG, YDHU, YNFH, ACEE, MNGR, DCUR, DCUS, ZNTA, YFID, LLDD, PFLA, NIKE, MQO, NARL, PYKA, PFLC, DMSC, YHJA, PYKF, GLPA, UBIX, DSBB, HYFG, GRXD, YCEJ, TORS, YGFS, HCAC, RSXD, TRXC, YGCR, RSXC, RSXB, CYOA, RSXA, PFKA |
| GOTERM_BP_FAT                           | GO:0022900~electron transport chain                       | YHJA, FRDB, DSBB, NAPB, YNFG, YDHU, YNFH, GRXD, YCEJ, HCAC, YGFS, RSXD, TRXC, YGCR, RSXC, CYOA, RSXB, RSXA, DMSC                                                                                                                                                      |
| GOTERM_MF_FAT                           | GO:0009055~electron carrier activity                      | FRDB, YDHY, YNFE, YNFF, YDHX, YNFG, YDHU, YDHV, GLTD, LLDD, YDIS, YHJA, AHPF, DSBB, HYFG, TORZ, GRXD, YCEJ, YCAK, HCAC, YGFS, TRXB, TRXC, YGCR, HCAD, RSXC, CYOA, RSXB, YDGJ, YGFT                                                                                    |

| Enrichment Score:                       |                                    |                                                                                                    |
|-----------------------------------------|------------------------------------|----------------------------------------------------------------------------------------------------|
| Annotation Cluster 11 4.304510052100273 |                                    |                                                                                                    |
| Category                                | Term                               | Genes                                                                                              |
| SP_PIR_KEYWORDS                         | protein biosynthesis               | RPMJ, RPSD, RPSC, ASNS, SERS, RPMD, ARGS, RPLW, RPSS, RPLV, RPSM, RIMK, GLYS, RPSJ, GLYQ, RPSK     |
| SP_PIR_KEYWORDS                         | ribosome                           | RPMJ, RPLW, RPSS, RPSD, RPSC, RPLV, RPSM, RPSJ, RPSK, RPMD                                         |
| SP_PIR_KEYWORDS                         | ribonucleoprotein                  | RPMJ, RPLW, RPSS, RPSD, RPSC, RPLV, RPSM, RPSJ, RPSK, FFH, RPMD                                    |
| GOTERM_CC_FAT                           | GO:0015935~small ribosomal subunit | RPSS, RPSD, RPSC, RPSJ                                                                             |
| GOTERM_MF_FAT                           | GO:0003723~RNA binding             | RPSD, RPSC, RNR, SRMB, RLML, OBGE, RPLW, RPSS, RPLV, RPSM, RLUE, SMPB, RHLB, RPSJ, RPSK, TRUA, FFH |
| GOTERM_MF_FAT                           | GO:0000049~tRNA binding            | RPSS, RPSM, RPSJ                                                                                   |

| Enrichment Score:                        |           |                                                                                                                                                           |
|------------------------------------------|-----------|-----------------------------------------------------------------------------------------------------------------------------------------------------------|
| Annotation Cluster 12 3.9113865374882444 |           |                                                                                                                                                           |
| Category                                 | Term      | Genes                                                                                                                                                     |
| SP_PIR_KEYWORDS                          | magnesium | EBGA, RFBA, EXOX, PTSI, NUDF, ACEE, SPEA, ZNTA, NUDK, NUDL, DGOD, YCHF, RFAP, YIDA, PYKA, PYKF, GALU, VSR, FBP, DDLA, PYRE, RIMK, SELD, YBJI, PFKA, PTR A |

| Enrichment Score:                        |                  |                                                                                                                                                                      |
|------------------------------------------|------------------|----------------------------------------------------------------------------------------------------------------------------------------------------------------------|
| Annotation Cluster 13 3.7422686075689926 |                  |                                                                                                                                                                      |
| Category                                 | Term             | Genes                                                                                                                                                                |
| SP_PIR_KEYWORDS                          | phosphoprotein   | QSEC, NARQ, NARX, USPA, FRUA, FRYC, PTSI, CYAA, PTSG, DCUR, DCUS, ZNTA, FIMZ, CPXR, NARL, TDCB, CREC, MANX, CHBB, YEDV, CHBA, SRLE, SRLA, WZC, SRLB, NPR, BAES, TORS |
| SP_PIR_KEYWORDS                          | phosphohistidine | PTSI, NARQ, NPR, DCUS, TORS, NARX, SRLB, MANX, CREC                                                                                                                  |

|                 |                                                                    |                                                                                                     |
|-----------------|--------------------------------------------------------------------|-----------------------------------------------------------------------------------------------------|
| KEGG_PATHWAY    | ecw02020:Two-component system                                      | RCSA, QSEC, NARQ, FRDD, FRDC, FRDB, NARX, AER, DCUR, DCUS, BAES, AMPC, TORS, FIMZ, CPXR, NARL, CREC |
| SP_PIR_KEYWORDS | autophosphorylation                                                | NARQ, DCUS, NARX, CREC                                                                              |
| INTERPRO        | IPR003660:HAMP linker domain                                       | YEDV, QSEC, AER, NARQ, BAES, TORS, NARX, CREC                                                       |
| UP_SEQ_FEATURE  | domain:Histidine kinase                                            | YEDV, QSEC, NARQ, DCUS, BAES, TORS, NARX, CREC                                                      |
| INTERPRO        | IPR005467:Signal transduction histidine kinase, core               | YEDV, QSEC, NARQ, DCUS, BAES, TORS, NARX, CREC                                                      |
| SMART           | SM00388:HisKA                                                      | YEDV, QSEC, HELD, BAES, TORS, NARX, CREC                                                            |
| SMART           | SM00387:HATPase_c                                                  | YEDV, QSEC, NARQ, DCUS, BAES, TORS, NARX, CREC                                                      |
| GOTERM_BP_FAT   | GO:0000160~two-component signal transduction system (phosphorelay) | RCSA, YEDV, QSEC, NARQ, YJJQ, NARX, TYRR, YEGE, DCUR, DCUS, BAES, TORS, FIMZ, CPXR, NARL, CREC      |

Enrichment Score:

Annotation Cluster 14 3.7165808580986788

| Category     | Term                       | Genes                                                           |
|--------------|----------------------------|-----------------------------------------------------------------|
| KEGG_PATHWAY | ect00230:Purine metabolism | CYAA, NUDF, RIHB, GUAA, PYKF, HOLA, RPOA, POLA, HOLE, PYKA, ADD |

Enrichment Score:

Annotation Cluster 15 3.4138636665047963

| Category        | Term                   | Genes                                                                                                                                                                                                                                                                                                                                                                                                             |
|-----------------|------------------------|-------------------------------------------------------------------------------------------------------------------------------------------------------------------------------------------------------------------------------------------------------------------------------------------------------------------------------------------------------------------------------------------------------------------|
| SP_PIR_KEYWORDS | nucleotide-binding     | QSEC, NARQ, TDCD, SRMB, NARX, YBBL, DCUS, ZNTA, FRLD, RECQ, NIKE, NARL, YEDV, TYRR, ARGS, XYLG, MURF, CYDC, RIMK, YAJQ, CYDD, RHLB, GLYS, ARGK, GLYQ, LORD, PRKB, MODF, PFKA, YDDA, ASNS, YGGC, MIND, HSCC, RFBB, NAGK, YNJD, SERS, CYAA, OBGE, YGGR, YCHF, RFAP, PYKA, CREC, RTCA, BTUD, NADD, BTUC, PYKF, PHNC, FBP, WZC, DDLA, SAPF, GUAA, HELD, SAPD, TDK, BAES, TORS, MUTS, COAA, CPSB, YGFQ, SELD, FFH, UDK |
| SP_PIR_KEYWORDS | atp-binding            | QSEC, NARQ, TDCD, SRMB, NARX, YBBL, DCUS, ZNTA, FRLD, RECQ, NIKE, NARL, YEDV, TYRR, ARGS, MURF, XYLG, CYDC, RIMK, CYDD, RHLB, GLYS, ARGK, GLYQ, LORD, PRKB, MODF, PFKA, YDDA, ASNS, YGGC, MIND, HSCC, RFBB, NAGK, YNJD, SERS, CYAA, USPF, YGGR, RFAP, PYKA, CREC, RTCA, BTUD, NADD, BTUC, PYKF, PHNC, WZC, DDLA, GUAA, SAPF, HELD, SAPD, TDK, BAES, TORS, MUTS, COAA, YGFQ, SELD, UDK                             |
| GOTERM_MF_FAT   | GO:0005524~ATP binding | QSEC, NARQ, TDCD, SRMB, NARX, YBBL, DCUS, ZNTA, FRLD, RECQ, NIKE, NARL, YEDV, TYRR, ARGS, MURF, XYLG, CYDC, RIMK, CYDD, RHLB, GLYS, ARGK, GLYQ, LORD, PRKB, MODF, PFKA, YDDA, ASNS, YGGC, MIND, HSCC, RFBB, NAGK, YNJD, SERS, CYAA, USPF, SBMA, NFRB, YGGR, RFAP, YBHS, PYKA, CREC, RTCA, BTUD, NADD, BTUC, PYKF, PHNC, WZC, DDLA, SAPF, GUAA, HELD, SAPD, TDK, BAES, TORS, MUTS, COAA, YGFQ, SELD, UDK           |

|                                          |                                                  |                                                                                                                                                                                                                                                                                                                                                                                                                                                                                                                                                |
|------------------------------------------|--------------------------------------------------|------------------------------------------------------------------------------------------------------------------------------------------------------------------------------------------------------------------------------------------------------------------------------------------------------------------------------------------------------------------------------------------------------------------------------------------------------------------------------------------------------------------------------------------------|
| GOTERM_MF_FAT                            | GO:0032553~ribonucleotide binding                | QSEC, NARQ, TDCD, SRMB, NARX, YBBL, DCUS, ZNTA, FRLD, RECQ, NIKE, NARL, YEDV, TYRR, ARGS, XYLG, MURF, CYDC, RIMK, CYDD, RHLB, GLYS, ARGK, GLYQ, LORD, PRKB, MODF, PFKA, YDDA, ASNS, YGGC, MIND, HSCC, RFBB, NAGK, YNJD, SERS, CYAA, USPF, OBGE, SBMA, NFRB, YGGR, YCHF, RFAP, YBHS, PYKA, CREC, RTCA, BTUD, BTUC, NADD, PYKF, PHNC, WZC, DDLA, SAPF, GUAA, HELD, SAPD, TDK, BAES, TORS, MUTS, COAA, CPSB, YGFQ, SELD, FFH, UDK                                                                                                                 |
| GOTERM_MF_FAT                            | GO:0032555~purine ribonucleotide binding         | QSEC, NARQ, TDCD, SRMB, NARX, YBBL, DCUS, ZNTA, FRLD, RECQ, NIKE, NARL, YEDV, TYRR, ARGS, XYLG, MURF, CYDC, RIMK, CYDD, RHLB, GLYS, ARGK, GLYQ, LORD, PRKB, MODF, PFKA, YDDA, ASNS, YGGC, MIND, HSCC, RFBB, NAGK, YNJD, SERS, CYAA, USPF, OBGE, SBMA, NFRB, YGGR, YCHF, RFAP, YBHS, PYKA, CREC, RTCA, BTUD, BTUC, NADD, PYKF, PHNC, WZC, DDLA, SAPF, GUAA, HELD, SAPD, TDK, BAES, TORS, MUTS, COAA, CPSB, YGFQ, SELD, FFH, UDK                                                                                                                 |
| GOTERM_MF_FAT                            | GO:0000166~nucleotide binding                    | QSEC, NARQ, TDCD, SRMB, NARX, YBBL, DCUS, ZNTA, FRLD, RECQ, GLTD, NIKE, NARL, PANE, YEDV, PDXH, GLPA, AHPF, YGCU, TYRR, HYFG, ARGS, RPLW, XYLG, MURF, YCGE, CYDC, RIMK, YAJQ, CYDD, RHLB, GLYS, ARGK, TRXB, GLYQ, LORD, PRKB, RSXC, MODF, PFKA, YDDA, GND, ASNS, YGGC, NAGK, MIND, HSCC, RFBB, YRAR, YNJD, SERS, CYAA, USPF, OBGE, SBMA, NFRB, YGGR, YCHF, RFAP, LLDD, YBHS, PYKA, CREC, FADJ, RTCA, BTUD, BTUC, NADD, PYKF, PHNC, FBP, WZC, DDLA, SAPF, GUAA, HELD, TDK, SAPD, BAES, MUTS, TORS, COAA, YGFQ, CPSB, HCAD, SELD, FFH, YGFT, UDK |
| UP_SEQ_FEATURE                           | nucleotide phosphate-binding region:ATP          | YDDA, SRMB, YGGC, NAGK, MIND, YNJD, SERS, YBBL, YGGR, RECQ, NIKE, BTUD, BTUC, PHNC, DDLA, TYRR, GUAA, SAPF, HELD, TDK, SAPD, XYLG, MURF, CYDC, RIMK, CYDD, MUTS, RHLB, COAA, ARGK, LORD, YGFQ, PRKB, SELD, PFKA, UDK                                                                                                                                                                                                                                                                                                                           |
| Enrichment Score:                        |                                                  |                                                                                                                                                                                                                                                                                                                                                                                                                                                                                                                                                |
| Annotation Cluster 16 3.3724274305760975 |                                                  |                                                                                                                                                                                                                                                                                                                                                                                                                                                                                                                                                |
| Category                                 | Term                                             | Genes                                                                                                                                                                                                                                                                                                                                                                                                                                                                                                                                          |
| GOTERM_BP_FAT                            | GO:0009226~nucleotide-sugar biosynthetic process | RIHA, MANA, CPSB, RFBA, RFBB, RFBC, RFBD                                                                                                                                                                                                                                                                                                                                                                                                                                                                                                       |
| GOTERM_BP_FAT                            | GO:0009225~nucleotide-sugar metabolic process    | RIHA, MANA, GMD, GALU, CPSB, RFBA, RFBB, RFBC, RFBD                                                                                                                                                                                                                                                                                                                                                                                                                                                                                            |
| KEGG_PATHWAY                             | ecj00523:Polyketide sugar unit biosynthesis      | RFBA, RFBB, RFBC, RFBD                                                                                                                                                                                                                                                                                                                                                                                                                                                                                                                         |
| Enrichment Score:                        |                                                  |                                                                                                                                                                                                                                                                                                                                                                                                                                                                                                                                                |
| Annotation Cluster 17 3.136465816777248  |                                                  |                                                                                                                                                                                                                                                                                                                                                                                                                                                                                                                                                |
| Category                                 | Term                                             | Genes                                                                                                                                                                                                                                                                                                                                                                                                                                                                                                                                          |
| KEGG_PATHWAY                             | ecd00010:Glycolysis / Gluconeogenesis            | PTSG, ACEE, TPIA, PYKF, BGLA, FBP, CHBF, PYKA, PFKA                                                                                                                                                                                                                                                                                                                                                                                                                                                                                            |
| GOTERM_BP_FAT                            | GO:0019318~hexose metabolic process              | TDCE, TPIA, PYKF, GND, TDCG, GMD, GALU, FBP, RFBA, YIHU, RFBC, YIHS, YGBJ, ACEE, PRKB, PFLA, PYKA, FUCU, PFLC, PFKA                                                                                                                                                                                                                                                                                                                                                                                                                            |
| GOTERM_BP_FAT                            | GO:0005996~monosaccharide metabolic process      | TDCE, TPIA, TDCG, GND, YIHU, RFBA, NAGK, YIHS, RFBC, YGBJ, ACEE, NAGC, PFLA, FUCU, PYKA, PFLC, KDSA, PYKF, GMD, GALU, AGAI, FBP, AGAD, PRKB, PFKA                                                                                                                                                                                                                                                                                                                                                                                              |

|               |                                    |                       |
|---------------|------------------------------------|-----------------------|
| GOTERM_BP_FAT | GO:0006098~pentose-phosphate shunt | YGBJ, TPIA, GND, YIHU |
| GOTERM_BP_FAT | GO:0006739~NADP metabolic process  | YGBJ, TPIA, GND, YIHU |

|                       |                                                |                                                                                                |
|-----------------------|------------------------------------------------|------------------------------------------------------------------------------------------------|
| Enrichment Score:     |                                                |                                                                                                |
| Annotation Cluster 18 | 2.921562174540362                              |                                                                                                |
| Category              | Term                                           | Genes                                                                                          |
| GOTERM_BP_FAT         | GO:0009252~peptidoglycan biosynthetic process  | DDLA, DACB, HIPA, HIPB, LDCA, YBJG, MURF, AMPC, MRCA, MLTB, MLTC, AMIB, NAGZ, MIPA             |
| SP_PIR_KEYWORDS       | cell wall biogenesis/degradation               | LDCA, YBJG, MURF, MRCA, MLTB, AMIB, MLTC, DDLA, DACB, NAGZ                                     |
| SP_PIR_KEYWORDS       | cell shape                                     | LDCA, YBJG, MURF, MRDB, MRCA, DDLA, DACB, NAGZ                                                 |
| GOTERM_BP_FAT         | GO:0030203~glycosaminoglycan metabolic process | ARRD, DDLA, NAGK, DACB, HIPA, HIPB, LDCA, YBJG, MURF, AMPC, MRCA, MLTB, AMIB, MLTC, NAGZ, MIPA |

|                       |                              |                                         |
|-----------------------|------------------------------|-----------------------------------------|
| Enrichment Score:     |                              |                                         |
| Annotation Cluster 19 | 2.710071754846438            |                                         |
| Category              | Term                         | Genes                                   |
| KEGG_PATHWAY          | ecd00620:Pyruvate metabolism | TDCE, ACEE, PYKF, LLDD, GLOA, PYKA, MQO |

|                       |                                                                             |                                                                                                                                                                                        |
|-----------------------|-----------------------------------------------------------------------------|----------------------------------------------------------------------------------------------------------------------------------------------------------------------------------------|
| Enrichment Score:     |                                                                             |                                                                                                                                                                                        |
| Annotation Cluster 20 | 2.6107761139508745                                                          |                                                                                                                                                                                        |
| Category              | Term                                                                        | Genes                                                                                                                                                                                  |
| SP_PIR_KEYWORDS       | sugar transport                                                             | FRWC, FRWD, FRUA, FRYC, PTSI, KDGT, WZA, MGLC, PTSG, YPHD, SETB, MANY, MANX, CHBB, MANZ, SETA, CHBA, SRLE, GNTU, SRLA, SRLB, AGAC, AGAD, XYLE, XYLG                                    |
| SP_PIR_KEYWORDS       | Phosphotransferase system                                                   | CHBB, MANZ, CHBA, FRWC, SRLE, FRWD, SRLA, SRLB, FRUA, AGAC, FRYC, AGAD, PTSI, PTSG, NPR, SRLR, GUTM, MANY, MANX                                                                        |
| GOTERM_MF_FAT         | GO:0008982~protein-N(PI)-phosphohistidine-sugar phosphotransferase activity | CHBB, MANZ, CHBA, FRWC, SRLE, FRWD, SRLA, SRLB, FRUA, AGAC, FRYC, AGAD, PTSI, PTSG, MANY, MANX                                                                                         |
| GOTERM_BP_FAT         | GO:0008643~carbohydrate transport                                           | FRWC, FRWD, FRUA, FRYC, PTSI, KDGT, WZA, MGLC, PTSG, YPHD, SETB, SRLR, MANY, FUCU, MANX, YGBN, SETA, CHBB, MANZ, CHBA, YJHF, SRLE, GNTU, SRLA, SRLB, AGAC, AGAD, XYLE, NPR, XYLG, GUTM |

|                       |                                   |                                                    |
|-----------------------|-----------------------------------|----------------------------------------------------|
| Enrichment Score:     |                                   |                                                    |
| Annotation Cluster 21 | 2.5140381163035124                |                                                    |
| Category              | Term                              | Genes                                              |
| KEGG_PATHWAY          | ect00240:Pyrimidine metabolism    | PYRE, RIHB, TDK, HOLA, RPOA, TRXB, POLA, HOLE, UDK |
| KEGG_PATHWAY          | ect03430:Mismatch repair          | RECJ, HOLA, MUTS, HOLE, SBCB, EXOX                 |
| KEGG_PATHWAY          | ecd03440:Homologous recombination | RECJ, DNAT, HOLA, POLA, HOLE                       |



|                 |                                   |                                    |
|-----------------|-----------------------------------|------------------------------------|
|                 | ecc03440:Homologous recombination |                                    |
| KEGG_PATHWAY    | recombination                     | RECJ, DNAT, HOLA, HOLE             |
| SP_PIR_KEYWORDS | dna replication                   | HELD, DNAT, HOLA, LEXA, POLA, HOLE |
| SP_PIR_KEYWORDS | dna-directed dna polymerase       | HOLA, POLA, HOLE                   |
| KEGG_PATHWAY    | ect03030:DNA replication          | HOLA, POLA, HOLE                   |
| KEGG_PATHWAY    | ecI00240:Pyrimidine metabolism    | PYRE, RIHB, HOLA                   |

Enrichment Score:

Annotation Cluster 22 2.4875679650870612

| Category     | Term                          | Genes                                    |
|--------------|-------------------------------|------------------------------------------|
| KEGG_PATHWAY | ecd00052:Galactose metabolism | DGOD, GALU, AGAI, EBGA, AGAC, AGAD, PFKA |

Enrichment Score:

Annotation Cluster 23 2.418579839790211

| Category      | Term                                                                                                                                                                                                  | Genes                        |
|---------------|-------------------------------------------------------------------------------------------------------------------------------------------------------------------------------------------------------|------------------------------|
| KEGG_PATHWAY  | ecd00360:Phenylalanine metabolism                                                                                                                                                                     | TYNA, HCAF, HCAC, HCAB, HCAD |
| GOTERM_BP_FAT | GO:0019439~aromatic compound catabolic process                                                                                                                                                        | HCAF, HCAC, HCAB, TYRR, HCAD |
| GOTERM_MF_FAT | GO:0016708~oxidoreductase activity, acting on paired donors, with incorporation or reduction of molecular oxygen, NADH or NADPH as one donor, and incorporation of two atoms of oxygen into one donor | HCAF, HCAC, HCAD             |

Enrichment Score:

Annotation Cluster 24 2.28666317904145

| Category      | Term                                                       | Genes                                                                      |
|---------------|------------------------------------------------------------|----------------------------------------------------------------------------|
| GOTERM_MF_FAT | GO:0042280~cell surface antigen activity, host-interacting | RFAG, RCSA, KDSA, RFAL, GMD, RFBA, RFAC, RFBB, RFAB, FCL, CPSB, RFAP, RFAS |
| KEGG_PATHWAY  | eco00540:Lipopolysaccharide biosynthesis                   | RFAG, KDSA, RFAL, RFAP, RFAC, RFAB                                         |

Enrichment Score:

Annotation Cluster 25 2.0606768572433305

| Category        | Term          | Genes                                                            |
|-----------------|---------------|------------------------------------------------------------------|
| SP_PIR_KEYWORDS | cell cycle    | YCIB, ZAPA, MURF, FTSN, MIND, DACB, MINE, NAGZ, CEDA, MINC       |
| SP_PIR_KEYWORDS | cell division | YCIB, ENVC, ZAPA, MURF, FTSN, MIND, DACB, MINE, NAGZ, CEDA, MINC |

Enrichment Score:

Annotation Cluster 26 2.0169063214021836

| Category | Term | Genes |
|----------|------|-------|
|----------|------|-------|

|              |                                                   |                                          |
|--------------|---------------------------------------------------|------------------------------------------|
| KEGG_PATHWAY | eck00650:Butanoate metabolism                     | TDCE, FRDD, ACEE, FRDC, FRDB, FADJ, PAAG |
| KEGG_PATHWAY | ecj00632:Benzoate degradation<br>via CoA ligation | FRDD, FRDC, FRDB, FADJ, PAAG             |
| KEGG_PATHWAY | eck00020:Citrate cycle (TCA<br>cycle)             | FRDD, ACEE, FRDC, YBHJ, FRDB             |
| KEGG_PATHWAY | eck00640:Propanoate<br>metabolism                 | TDCE, TDCD, FADJ, PAAG                   |
| KEGG_PATHWAY | ecv00190:Oxidative<br>phosphorylation             | FRDD, FRDC, FRDB, CYOA                   |

|                       |                    |                                                                                                                            |
|-----------------------|--------------------|----------------------------------------------------------------------------------------------------------------------------|
| Enrichment Score:     |                    |                                                                                                                            |
| Annotation Cluster 27 | 1.9387457480329622 |                                                                                                                            |
| Category              | Term               | Genes                                                                                                                      |
| SP_PIR_KEYWORDS       | palmitate          | MDTP, WZA, YDDW, YJBF, YEAY, APBE, SLYB, MLTB, MLTC, SPR, YFGH, CYOA                                                       |
| SP_PIR_KEYWORDS       | lipoprotein        | MDTP, DEDD, YAIW, APBE, YNBE, YCFL, WZA, YDDW, YJBF, YCAL, YEAY, SLYB, MLTB, LOLD, MLTC, SPR, LOLC, YFGH, CYOA, LOLE, YDEK |

|                       |                                                        |                                                                          |
|-----------------------|--------------------------------------------------------|--------------------------------------------------------------------------|
| Enrichment Score:     |                                                        |                                                                          |
| Annotation Cluster 28 | 1.93564258224996                                       |                                                                          |
| Category              | Term                                                   | Genes                                                                    |
| GOTERM_BP_FAT         | GO:0044265~cellular<br>macromolecule catabolic process | RECJ, RNR, YGDG, RHLB, RND, VSR, MCRC, SBCB, EXOX                        |
| SP_PIR_KEYWORDS       | nuclease                                               | RECJ, RNR, YGDG, RND, VSR, POLA, SBCB, EXOX                              |
| GOTERM_BP_FAT         | GO:0006308~DNA catabolic<br>process                    | RECJ, YGDG, VSR, MCRC, SBCB, EXOX                                        |
| SP_PIR_KEYWORDS       | exonuclease                                            | RECJ, RNR, YGDG, RND, POLA, SBCB, EXOX                                   |
| GOTERM_MF_FAT         | GO:0004518~nuclease activity                           | RECJ, RNR, VSR, POLA, MCRC, EXOX, YIHY, YGDG, YIHG, RND, CHO, MUTY, SBCB |

|                       |                    |                                          |
|-----------------------|--------------------|------------------------------------------|
| Enrichment Score:     |                    |                                          |
| Annotation Cluster 29 | 1.9027039857776509 |                                          |
| Category              | Term               | Genes                                    |
| SP_PIR_KEYWORDS       | protein transport  | TOLR, TOLQ, SAPF, SAPD, SAPB, SAPC, SECY |

|                       |                      |                              |
|-----------------------|----------------------|------------------------------|
| Enrichment Score:     |                      |                              |
| Annotation Cluster 30 | 1.8528943960188873   |                              |
| Category              | Term                 | Genes                        |
| SP_PIR_KEYWORDS       | sensory transduction | RCSA, NARQ, TORS, NARX, NARL |
| SP_PIR_KEYWORDS       | nitrate assimilation | NARQ, NARX, NARL             |

|                       |                    |       |
|-----------------------|--------------------|-------|
| Enrichment Score:     |                    |       |
| Annotation Cluster 31 | 1.6819744533635657 |       |
| Category              | Term               | Genes |

|                       |                                                             |                                                                                                                                                |
|-----------------------|-------------------------------------------------------------|------------------------------------------------------------------------------------------------------------------------------------------------|
| GOTERM_BP_FAT         | GO:0019674~NAD metabolic process                            | NADD, GMD, RFBB, CHBF, GLVG, PNCA                                                                                                              |
| GOTERM_BP_FAT         | GO:0006769~nicotinamide metabolic process                   | YGBJ, NADD, TPIA, GND, GMD, YIHU, RFBB, CHBF, GLVG, PNCA                                                                                       |
| GOTERM_BP_FAT         | GO:0006732~coenzyme metabolic process                       | TPIA, NADD, FRDB, GND, GMD, YGGC, SCPC, YIHU, PABB, RFBB, CHBF, YGBJ, ACEE, MNGR, COAA, MQO, MODF, PANE, GLVG, PANF, PNCA                      |
| GOTERM_BP_FAT         | GO:0009165~nucleotide biosynthetic process                  | NADD, GMD, CHBF, RFBB, PURU, PYRE, CYAA, GUAA, ZNTA, GLVG, PANE, ADD, PNCA                                                                     |
| GOTERM_BP_FAT         | GO:0051186~cofactor metabolic process                       | TPIA, NADD, FRDB, GND, GMD, YGGC, SCPC, PABB, YIHU, RFBB, MIND, CHBF, YGBJ, ACEE, MNGR, COAA, MQO, MODF, PANE, GLVG, PANF, PNCA                |
| GOTERM_BP_FAT         | GO:0006766~vitamin metabolic process                        | PDXH, NADD, RIBC, GMD, APBE, PABB, RFBB, CHBF, MIND, GLVG, PNCA                                                                                |
| Enrichment Score:     |                                                             |                                                                                                                                                |
| Annotation Cluster 32 | 1.6706726762201645                                          |                                                                                                                                                |
| Category              | Term                                                        | Genes                                                                                                                                          |
| GOTERM_BP_FAT         | GO:0044042~glucan metabolic process                         | MDOC, MDOB, MDOG, YEDQ, MDOH, BCSZ                                                                                                             |
| Enrichment Score:     |                                                             |                                                                                                                                                |
| Annotation Cluster 33 | 1.6151514743006112                                          |                                                                                                                                                |
| Category              | Term                                                        | Genes                                                                                                                                          |
| GOTERM_BP_FAT         | GO:0046364~monosaccharide biosynthetic process              | TPIA, KDSA, NAGC, TDCG, FBP, RFBA, RFBC, AGAD                                                                                                  |
| SP_PIR_KEYWORDS       | gluconeogenesis                                             | TPIA, TDCG, FBP                                                                                                                                |
| GOTERM_BP_FAT         | GO:0019319~hexose biosynthetic process                      | TPIA, TDCG, FBP, RFBA, RFBC                                                                                                                    |
| GOTERM_BP_FAT         | GO:0006090~pyruvate metabolic process                       | ACEE, TPIA, TDCG, FBP                                                                                                                          |
| Enrichment Score:     |                                                             |                                                                                                                                                |
| Annotation Cluster 34 | 1.5939361820273072                                          |                                                                                                                                                |
| Category              | Term                                                        | Genes                                                                                                                                          |
| SP_PIR_KEYWORDS       | 4fe-4s                                                      | FRDB, TDCG, YDHY, YNFE, YNFF, YDHX, HYFG, YNFG, YGFS, GLTD, RSXC, PFLA, YDEM, RSXB, MUTY, PFLC, YGFT                                           |
| SP_PIR_KEYWORDS       | iron                                                        | YHJA, FRDB, YBHJ, TDCG, YDHY, NAPB, YNFE, YNFF, YDHX, HYFG, YNFG, YCEJ, HCAC, YGFS, GLTD, PFLA, RSXC, YDEM, RSXB, MUTY, PFLC, CCME, YGGX, YGFT |
| SP_PIR_KEYWORDS       | iron-sulfur                                                 | YBHJ, FRDB, TDCG, YDHY, YNFE, YNFF, YDHX, HYFG, YNFG, HCAC, YGFS, GLTD, PFLA, RSXC, YDEM, RSXB, MUTY, PFLC, YGFT                               |
| SP_PIR_KEYWORDS       | iron-sulfur protein                                         | FRDB, RSXC, RSXB, YNFE, YNFF, YNFG                                                                                                             |
| INTERPRO              | IPR017896:4Fe-4S ferredoxin, iron-sulphur binding domain    | YDJY, FRDB, YGFS, GLTD, YDHY, RSXC, RSXB, PFLC, YDHX, YNFG, YGFT                                                                               |
| INTERPRO              | IPR001450:4Fe-4S ferredoxin, iron-sulphur binding, subgroup | FRDB, YGFS, YDHY, RSXC, RSXB, YDHX, YNFG, YGFT                                                                                                 |

|                       |                                                        |                                                                                                                                                                                    |
|-----------------------|--------------------------------------------------------|------------------------------------------------------------------------------------------------------------------------------------------------------------------------------------|
| GOTERM_MF_FAT         | GO:0009055~electron carrier activity                   | FRDB, YDHY, YNFE, YNFF, YDHX, YNFG, YDHU, YDHV, GLTD, LLDD, YDIS, YHJA, AHPF, DSBB, HYFG, TORZ, GRXD, YCEJ, YCAK, HCAC, YGFS, TRXB, TRXC, YGCR, HCAD, RSXC, CYOA, RSXB, YDGJ, YGFT |
| Enrichment Score:     |                                                        |                                                                                                                                                                                    |
| Annotation Cluster 35 | 1.5602878370273219                                     |                                                                                                                                                                                    |
| Category              | Term                                                   | Genes                                                                                                                                                                              |
| KEGG_PATHWAY          | ecc03070:Bacterial secretion system                    | GSPO, GSPJ, GSPK, GSPH, GSPI, SECY, FFH                                                                                                                                            |
| SP_PIR_KEYWORDS       | methylation                                            | AER, PPDC, PPDB, GSPJ, GSPH, RPSK, GSPI                                                                                                                                            |
| GOTERM_BP_FAT         | GO:0045184~establishment of protein localization       | TOLR, TOLQ, YHII, GSPJ, GSPK, GSPH, GSPI, SECY, SAPF, SAPD, SAPB, SAPC, LORD, FFH                                                                                                  |
| GOTERM_BP_FAT         | GO:0015031~protein transport                           | TOLR, TOLQ, YHII, GSPJ, GSPK, GSPH, GSPI, SECY, SAPF, SAPD, SAPB, SAPC, LORD, FFH                                                                                                  |
| GOTERM_CC_FAT         | GO:0015627~type II protein secretion system complex    | GSPJ, GSPH, GSPI                                                                                                                                                                   |
| GOTERM_BP_FAT         | GO:0046903~secretion                                   | YHII, GSPJ, GSPK, GSPH, GSPI                                                                                                                                                       |
| Enrichment Score:     |                                                        |                                                                                                                                                                                    |
| Annotation Cluster 36 | 1.5347680896040683                                     |                                                                                                                                                                                    |
| Category              | Term                                                   | Genes                                                                                                                                                                              |
| SP_PIR_KEYWORDS       | ligase                                                 | ARGS, GUAA, MURF, RFAL, RIMK, GLYS, GLYQ, ASNS, DDLA, PABB, RTCA, SERS                                                                                                             |
| KEGG_PATHWAY          | ecj00970:Aminoacyl-tRNA biosynthesis                   | ARGS, GLYS, GLYQ, ASNS, SERS                                                                                                                                                       |
| GOTERM_BP_FAT         | GO:0043039~tRNA aminoacylation                         | ARGS, PTH, GLYS, GLYQ, ASNS, SELD, TRUA, SERS                                                                                                                                      |
| GOTERM_BP_FAT         | GO:0043038~amino acid activation                       | ARGS, PTH, GLYS, GLYQ, ASNS, SELD, TRUA, SERS                                                                                                                                      |
| GOTERM_BP_FAT         | GO:0006418~tRNA aminoacylation for protein translation | ARGS, PTH, GLYS, GLYQ, ASNS, SELD, TRUA, SERS                                                                                                                                      |
| KEGG_PATHWAY          | ecc00970:Aminoacyl-tRNA biosynthesis                   | ARGS, GLYS, GLYQ, SERS                                                                                                                                                             |
| GOTERM_BP_FAT         | GO:0006399~tRNA metabolic process                      | ARGS, YEDF, YIHY, PTH, GLYS, RND, GLYQ, ASNS, CMOA, SELD, TRUA, SERS                                                                                                               |
| GOTERM_BP_FAT         | <b>GO:0034660~ncRNA metabolic process</b>              | ASNS, SERS, RLML, YEDF, ARGS, YIHY, RLUE, PTH, GLYS, RND, GLYQ, SELD, CMOA, TRUA                                                                                                   |
| Enrichment Score:     |                                                        |                                                                                                                                                                                    |
| Annotation Cluster 37 | 1.524800314407734                                      |                                                                                                                                                                                    |
| Category              | Term                                                   | Genes                                                                                                                                                                              |
| GOTERM_MF_FAT         | GO:0031420~alkali metal ion binding                    | TRKG, PYKF, YIDK, MDTK, KEFA, PYKA, PANF, KEFB                                                                                                                                     |
| SP_PIR_KEYWORDS       | potassium                                              | TRKG, PYKF, KEFA, PYKA, KEFB                                                                                                                                                       |

|                       |                                                                             |                                                                                                                                                         |
|-----------------------|-----------------------------------------------------------------------------|---------------------------------------------------------------------------------------------------------------------------------------------------------|
| GOTERM_BP_FAT         | GO:0006813~potassium ion transport                                          | TRKG, YBAL, KEFA, KEFB                                                                                                                                  |
| Enrichment Score:     |                                                                             |                                                                                                                                                         |
| Annotation Cluster 38 | 1.4844722414214753                                                          |                                                                                                                                                         |
| Category              | Term                                                                        | Genes                                                                                                                                                   |
| KEGG_PATHWAY          | eco00640:Propanoate metabolism                                              | TDCE, TDCD, SCPA, SCPB, FADJ, PAAG                                                                                                                      |
| Enrichment Score:     |                                                                             |                                                                                                                                                         |
| Annotation Cluster 39 | 1.4707755334398063                                                          |                                                                                                                                                         |
| Category              | Term                                                                        | Genes                                                                                                                                                   |
| SP_PIR_KEYWORDS       | dna repair                                                                  | HELD, MUTS, LEXA, VSR, RECQ, CHO, POLA, MODF, MUTY, SBCB, EXOX                                                                                          |
| SP_PIR_KEYWORDS       | DNA damage                                                                  | MUTS, LEXA, VSR, RECQ, CHO, POLA, MODF, MUTY, SBCB, EXOX                                                                                                |
| GOTERM_BP_FAT         | GO:0033554~cellular response to stress                                      | RFAG, RECJ, LEXA, VSR, POLA, EXOX, HELD, MUTS, RECQ, CHO, TRXB, MODF, IRAP, DINF, MUTY, SBCB                                                            |
| GOTERM_BP_FAT         | GO:0006974~response to DNA damage stimulus                                  | RECJ, LEXA, VSR, POLA, EXOX, HELD, MUTS, RECQ, CHO, MODF, DINF, MUTY, SBCB                                                                              |
| GOTERM_BP_FAT         | GO:0006259~DNA metabolic process                                            | MCRC, HIPA, HIPB, EXOX, DNAT, HOLA, RECQ, CHO, DINF, RECJ, YFDO, INSG, LEXA, VSR, POLA, HOLE, YFDM, HELD, TDK, YGDG, MUTS, IHFA, REND, MODF, MUTY, SBCB |
| Enrichment Score:     |                                                                             |                                                                                                                                                         |
| Annotation Cluster 40 | 1.4567075871324318                                                          |                                                                                                                                                         |
| Category              | Term                                                                        | Genes                                                                                                                                                   |
| SP_PIR_KEYWORDS       | lipid metabolism                                                            | HDHA, FADR, FADJ, PAAG                                                                                                                                  |
| Enrichment Score:     |                                                                             |                                                                                                                                                         |
| Annotation Cluster 41 | 1.36116679833629                                                            |                                                                                                                                                         |
| Category              | Term                                                                        | Genes                                                                                                                                                   |
| SP_PIR_KEYWORDS       | Flavoprotein                                                                | PDXH, YDIS, AER, GLPA, YGCU, AHPF, YCAK, LLDD, TRXB, YGCR, HCAD, MQO                                                                                    |
| SP_PIR_KEYWORDS       | FAD                                                                         | YDIS, AER, GLPA, YGCU, AHPF, TRXB, YGCR, HCAD, MQO                                                                                                      |
| INTERPRO              | IPR001327:Pyridine nucleotide-disulphide oxidoreductase, NAD-binding region | AHPF, GLTD, TRXB, HCAD, YGFT                                                                                                                            |
| INTERPRO              | IPR013027:FAD-dependent pyridine nucleotide-disulphide oxidoreductase       | YDIS, AHPF, GLTD, TRXB, HCAD, YGFT                                                                                                                      |
| Enrichment Score:     |                                                                             |                                                                                                                                                         |
| Annotation Cluster 42 | 1.3514776022801531                                                          |                                                                                                                                                         |
| Category              | Term                                                                        | Genes                                                                                                                                                   |
| GOTERM_MF_FAT         | GO:0031420~alkali metal ion binding                                         | TRKG, PYKF, YIDK, MDTK, KEFA, PYKA, PANF, KEFB                                                                                                          |

---

|                 |                  |                  |
|-----------------|------------------|------------------|
| SP_PIR_KEYWORDS | Sodium           | YIDK, MDTK, PANF |
| SP_PIR_KEYWORDS | Sodium transport | YIDK, MDTK, PANF |

---

Enrichment Score:

Annotation Cluster 43 1.3347730476755864

---

| Category     | Term                          | Genes            |
|--------------|-------------------------------|------------------|
| KEGG_PATHWAY | ecf03410:Base excision repair | RECJ, POLA, MUTY |
