# Supplementary material for: Central role for RNase YbeY in Hfq-dependent and Hfq-independent small-RNA regulation in bacteria
Source: PubMed Central journal article supplement (PMC3933206; doi:10.1186/1471-2164-15-121), 2014-02-11
Supplement: 1471-2164-15-121-S9.pdf [file 1471-2164-15-121-S9.pdf]

**Supplemental Table 9. Functional clusters of genes differentially regulated upon HU exposure only in YbeY presence (Figure 2)**

| Enrichment Score:    |                                         |                                                                                                                                                                                                                                                                                                                                                                                                                                                                                                                                                                                                                                                                                                                                                                                                                                                                                                                                                                                                                                                                                                                                                                                                                                                                                      |
|----------------------|-----------------------------------------|--------------------------------------------------------------------------------------------------------------------------------------------------------------------------------------------------------------------------------------------------------------------------------------------------------------------------------------------------------------------------------------------------------------------------------------------------------------------------------------------------------------------------------------------------------------------------------------------------------------------------------------------------------------------------------------------------------------------------------------------------------------------------------------------------------------------------------------------------------------------------------------------------------------------------------------------------------------------------------------------------------------------------------------------------------------------------------------------------------------------------------------------------------------------------------------------------------------------------------------------------------------------------------------|
| Annotation Cluster 1 | 27.091408410016633                      |                                                                                                                                                                                                                                                                                                                                                                                                                                                                                                                                                                                                                                                                                                                                                                                                                                                                                                                                                                                                                                                                                                                                                                                                                                                                                      |
| Category             | Term                                    | Genes                                                                                                                                                                                                                                                                                                                                                                                                                                                                                                                                                                                                                                                                                                                                                                                                                                                                                                                                                                                                                                                                                                                                                                                                                                                                                |
|                      |                                         | GUDP, LGT, AAS, HTPG, MALF, MALG, YCJF, HTPX, TRKH, MALK, YDJK, ABRB, YIAV, NIKD, NIKB, YDJE, NIKC, ACRE, PUUP, YBBY, GNTP, BCR, HYBC, SYD, HYBB, CAIT, HYBO, RHTC, YICE, YBCI, APPB, DLD, HTRE, RFBX, GFCE, SFMD, GSIA, NAGE, YCHE, LAMB, RCSD, RCSF, YCHM, YHAH, YIAD, AFUB, PLSB, CYNX, YAAU, YAAJ, HSRA, YQEG, TDDT, YAFT, SSUB, NARH, NARG, MDTE, MDTF, NARK, YIGM, NLPE, GSPL, GSPM, FEOB, HEMX, CLD, YPDA, GFCA, EVGS, CITT, SUGE, YBGQ, YHBX, YBGT, YQGA, YIDH, YIDI, FTSI, YJJP, ENVZ, YADH, FTSQ, FTSW, LPXL, YADS, YJIY, MACA, YIDC, PQIA, MNGA, SHIA, WZXC, OSMB, NANC, YHID, ZITB, HDED, PSTC, YCBB, PSTB, NUOG, MRCB, NANT, YPHA, YQHA, YFHM, YFHK, HOFD, YJET, RFC, NUOH, NUOI, NUOJ, UBIB, YEDD, NUPG, YCCM, MRDA, FDOI, YDCU, YBJP, YBJO, FDOH, PGSA, YDCO, YAJG, YAJI, CUSA, CADC, YEGT, LPTB, CADB, YFGO, YTFB, WECH, PPX, YQJA, NAPH, YAIY, YFGM, KDPD, TATA, WAAU, TATE, YFGA, UHPB, GLNQ, PSUT, NMPC, YJIJ, YQJE, YPFN, BTUB, TORC, TAUC, EMRD, TAUB, TAUD, FLK, YHFL, CCMG, CCMH, YAHG, CCMF, FHUC, YGIH, YEAI, YKGB, DCUA, YFEO, NRFD, YJCE, SECA, YFDY, FHUB, FHUA, YNEF, MDLA, GLPC, ZUPT, RSEC, MURG, RBN, PYRD, YPJA, PGAB, BCSA, PGAD, IDNT, YEBZ, SDAC, YJEP, FADL, YJEM, YRBK, YEBO, TONB, HFLB, HFLD, YJDF, BAMD, ZRAS, CYST, BAMB, HFLK, YEBE, YDAN |
| SP_PIR_KEYWORDS      | membrane                                |                                                                                                                                                                                                                                                                                                                                                                                                                                                                                                                                                                                                                                                                                                                                                                                                                                                                                                                                                                                                                                                                                                                                                                                                                                                                                      |
| Enrichment Score:    |                                         |                                                                                                                                                                                                                                                                                                                                                                                                                                                                                                                                                                                                                                                                                                                                                                                                                                                                                                                                                                                                                                                                                                                                                                                                                                                                                      |
| Annotation Cluster 2 | 16.347572556990297                      |                                                                                                                                                                                                                                                                                                                                                                                                                                                                                                                                                                                                                                                                                                                                                                                                                                                                                                                                                                                                                                                                                                                                                                                                                                                                                      |
| Category             | Term                                    | Genes                                                                                                                                                                                                                                                                                                                                                                                                                                                                                                                                                                                                                                                                                                                                                                                                                                                                                                                                                                                                                                                                                                                                                                                                                                                                                |
|                      |                                         | FHUC, FHUD, HYCB, DEF, FIXX, FES, NUOG, NRFB, MHPB, NRFC, NRFF, BFR, NARH, HEMH, NARG, HEMN, FHUB, FHUA, ENTF, HYBC, HYBA, HYBB, HYBO, FEOB, GLPC, YSAA, NUOI, RUMA, YCCM, APPB, FDOI, YGCF, DOS, FDOG, FDOH, YGCO, YJJW, NAPH, NFUA, NAPF, EFEB, ISPG, NAPA, DPS, MOAA, YJES, SDAB, SDAA, AEGA, HCR, HCP, NRFA, TORC, GARL, TAUD, CYBC, YBIY, CCMH                                                                                                                                                                                                                                                                                                                                                                                                                                                                                                                                                                                                                                                                                                                                                                                                                                                                                                                                  |
| SP_PIR_KEYWORDS      | iron                                    |                                                                                                                                                                                                                                                                                                                                                                                                                                                                                                                                                                                                                                                                                                                                                                                                                                                                                                                                                                                                                                                                                                                                                                                                                                                                                      |
|                      |                                         | HYCI, HYCB, FIXX, ZITB, SURE, EUTB, NUOG, HTPX, MHPB, YDJL, NIKD, NANK, NIKB, ZUR, NIKC, NIKA, ENTF, TOPA, PDXK, HYBC, HYBA, GLTX, HYBB, HYBO, YSAA, NUOI, NIKR, PDXY, APPB, YCCM, FDOI, RIBD, YGCF, RIBA, FDOG, FDOH, YGCO, CUSA, NAPH, NFUA, NAPF, FBAA, ISPG, NAPA, YBDH, NRDR, DNAQ, MOAA, AEGA, YFGC, NRFA, TORC, GARL, GUAD, TAUD, GLMU, PHP, YBEY, PRIA, FOLE, CCMH, FHUC, FHUD, DEF, FES, NRFB, METH, HEMB, SECA, NRFC, BFR, NRFF, NARH, HEMH, DXS, NARG, GLPX, FHUB, HEMN, FHUA, NLPE, FEOB, GLPC, PURD, RUMA, ZUPT, RBN, DOS, ADE, HSLO, PEPQ, YJJW, USHA, RPPH, EFEB, CUEO, AMPD, BISC, DPS, YJJG, YFCE, DCP, SDAB, YJES, SDAA, RPOH, HCR, HCP, DDLB, MAP, RSGA, CYBC, YBIY, HFLB, CYSS, ZRAS, YDAN, YFAU, SODC                                                                                                                                                                                                                                                                                                                                                                                                                                                                                                                                                           |
| GOTERM_MF_FAT        | GO:0046914~transition metal ion binding |                                                                                                                                                                                                                                                                                                                                                                                                                                                                                                                                                                                                                                                                                                                                                                                                                                                                                                                                                                                                                                                                                                                                                                                                                                                                                      |

|               |                           |                                                                                                                                                                                                                                                                                                                                                                                                                                                                                                                                                                                                                                                                                                                                                                                                                                                                                  |
|---------------|---------------------------|----------------------------------------------------------------------------------------------------------------------------------------------------------------------------------------------------------------------------------------------------------------------------------------------------------------------------------------------------------------------------------------------------------------------------------------------------------------------------------------------------------------------------------------------------------------------------------------------------------------------------------------------------------------------------------------------------------------------------------------------------------------------------------------------------------------------------------------------------------------------------------|
| GOTERM_MF_FAT | GO:0043169~cation binding | HYCI, UPP, HYCB, FIXX, ZITB, SURE, EUTB, NUOG, HTPX, TRKH, MHPB, GUDD, YDJL, NIKD, NANK, ZUR, NIKB, NIKC, NIKA, ENTF, TOPA, PDXK, HYBC, HYBA, GLTX, HYBB, HYBO, KDSB, YSAA, NUOI, NIKR, PDXY, APPB, YCCM, FDOI, RIBD, YGCF, RIBA, FDOG, FDOH, YGCO, CUSA, PURT, PPX, YEGX, NAPH, NFUA, NAPF, ISPG, FBAA, YBDH, NAPA, NRDR, TATD, DNAQ, MOAA, RUVC, AEGA, YFGC, BTUB, NRFA, TORC, GARL, PTSP, GUAD, TAUD, GLMU, GUAB, PHP, YBEY, PRIA, FOLE, CCMH, DUT, FHUC, FHUD, DEF, CPDB, PRS, FES, YJCE, NRFB, METH, HEMB, SECA, NRFC, BFR, NRFF, HEMH, NARH, DINB, NARG, DXS, GLPX, HEMN, FHUB, FHUA, GLGB, PURF, NLPE, YBGI, FEOB, GLPC, PURD, RUMA, ZUPT, RBN, DOS, ADE, PEPQ, HSLO, YJJW, USHA, RPPH, EFEB, CUEO, AMPD, FRYA, BISC, DPS, YJJG, YFCE, DCP, UIDA, YJES, SDAB, SDAA, RPOH, HCR, MENC, HCP, DDLB, HPT, GCL, MAP, RSGA, CYBC, YBIY, HFLB, CYSS, ZRAS, YBIV, YDAN, YFAU, SODC |
|---------------|---------------------------|----------------------------------------------------------------------------------------------------------------------------------------------------------------------------------------------------------------------------------------------------------------------------------------------------------------------------------------------------------------------------------------------------------------------------------------------------------------------------------------------------------------------------------------------------------------------------------------------------------------------------------------------------------------------------------------------------------------------------------------------------------------------------------------------------------------------------------------------------------------------------------|

|                      |                                         |
|----------------------|-----------------------------------------|
| Annotation Cluster 3 | Enrichment Score:<br>13.892992058293736 |
|----------------------|-----------------------------------------|

| Category        | Term   | Genes                                                                                                                                                                                                                                                                                                                                                                                                                                                                                                                                                                                                                 |
|-----------------|--------|-----------------------------------------------------------------------------------------------------------------------------------------------------------------------------------------------------------------------------------------------------------------------------------------------------------------------------------------------------------------------------------------------------------------------------------------------------------------------------------------------------------------------------------------------------------------------------------------------------------------------|
| SP_PIR_KEYWORDS | signal | NANC, YIBG, MALG, MALE, HDEB, HDEA, ALSB, MALM, SPY, MATC, YIAV, NANM, BGLX, NIKC, ACRE, NIKA, YFHM, HYBA, HYBO, YEDD, HTRE, EUTM, FDOG, YBJP, YAJG, YAJI, YFHG, DCRB, GFCE, CADB, LPTA, SFMD, GSIB, YTFJ, NAPA, PBPG, LAMB, RCSF, YQJC, YFGC, BTUB, NRFA, EMRD, YIAD, DEGP, YJHS, ENDA, CYNX, TORT, YTFM, YAAI, CCMH, FHUD, CPDB, PROX, YAFT, TESA, NRFB, NRFC, CSGC, YMGD, NRFF, MDTE, FHUA, NLPE, YAGV, GFCA, RSEB, EVGS, LOLA, YBGQ, AMIA, YAGX, USHA, ECPD, YBHG, YRAH, YPJA, EFEB, PGAB, CUEO, ENVZ, YADE, YRAP, YADN, YADM, YJEI, YADL, YJJA, YJEP, FADL, MACA, YBAV, DSBA, CYBC, HFLB, BAMD, BAMB, OSMB, SODC |

|                      |                                         |
|----------------------|-----------------------------------------|
| Annotation Cluster 4 | Enrichment Score:<br>13.029446537638417 |
|----------------------|-----------------------------------------|

| Category      | Term                                                      | Genes                                                                                                                                                                                                                                                                                                                                                                                     |
|---------------|-----------------------------------------------------------|-------------------------------------------------------------------------------------------------------------------------------------------------------------------------------------------------------------------------------------------------------------------------------------------------------------------------------------------------------------------------------------------|
| GOTERM_BP_FAT | GO:0009061~anaerobic respiration                          | YJJW, HYCB, NAPH, NAPF, NAPD, NAPA, NRFD, NUOG, NRFB, NRFC, NRFF, NRFG, NARH, NARG, NIKD, NARJ, GLTA, HYBG, MENB, MENC, NRFA, MENE, HYBC, TORC, HYBB, HYBO, GLPC, NUOH, NUOI, NUOJ, TORR, YBIY, FDOI, TORT, NIRD, FDOG, FDOH                                                                                                                                                              |
| GOTERM_BP_FAT | GO:0006091~generation of precursor metabolites and energy | HYCB, FIXX, NRFD, NUOG, NRFB, NRFC, NRFF, NRFG, NARH, NARG, NIKD, NARJ, HYCA, GLTA, PGK, GLGB, HYBG, PDXK, HYBC, HYBB, HYBO, GLPC, NUOH, YSAA, NUOI, GLGP, NUOJ, PDXY, YCCM, APPB, FDOI, TRXA, DLD, FDOG, FDOH, YGCO, PFKB, YJJW, NAPH, NAPF, NAPD, FBAA, NAPA, YTJC, MENB, MENC, HCR, MENE, NRFA, TORC, MIOC, TORR, GPSA, CYBC, YBIY, FIXC, TORT, FIXB, NIRD, ZRAS, FLDA, ZRAR, GLK, RHO |

|                      |                                        |
|----------------------|----------------------------------------|
| Annotation Cluster 5 | Enrichment Score:<br>9.932385112588221 |
|----------------------|----------------------------------------|

| Category     | Term                       | Genes                                                                                                                                     |
|--------------|----------------------------|-------------------------------------------------------------------------------------------------------------------------------------------|
| KEGG_PATHWAY | eco00230:Purine metabolism | PURH, PURT, USHA, PURF, PPX, PURL, CPDB, PRS, HPT, GUAD, PURD, SURE, PURC, YBCF, PURB, YJJG, DNAQ, GUAB, HOLD, HOLB, ADE, RPOZ, GMK, ALLD |

|                      |                     |                                                                                               |
|----------------------|---------------------|-----------------------------------------------------------------------------------------------|
|                      | Enrichment Score:   |                                                                                               |
| Annotation Cluster 6 | 8.21951015136021    |                                                                                               |
| Category             | Term                | Genes                                                                                         |
| SP_PIR_KEYWORDS      | metalloprotein      | NRFA, HYCB, HYBC, TORC, HYBO, NUOI, MAP, NRFB, NRFC, YCCM, YBIY, NARH, NARG, FDOG, FDOH, SODC |
| SP_PIR_KEYWORDS      | electron transfer   | NRFB, NRFC, NRFA, YCCM, TORC, NARH, FLDA, NARG, FDOH, NUOI                                    |
| SP_PIR_KEYWORDS      | iron-sulfur protein | NRFC, YCCM, HYCB, NARH, NARG, FDOG, FDOH, NUOI                                                |

|                      |                                                           |                                                                                                                                                                                                                                                                                                                                                                                           |
|----------------------|-----------------------------------------------------------|-------------------------------------------------------------------------------------------------------------------------------------------------------------------------------------------------------------------------------------------------------------------------------------------------------------------------------------------------------------------------------------------|
|                      | Enrichment Score:                                         |                                                                                                                                                                                                                                                                                                                                                                                           |
| Annotation Cluster 7 | 7.942358472198253                                         |                                                                                                                                                                                                                                                                                                                                                                                           |
| Category             | Term                                                      | Genes                                                                                                                                                                                                                                                                                                                                                                                     |
| SP_PIR_KEYWORDS      | electron transport                                        | HYCB, FIXX, NAPH, NAPF, NAPA, NRFB, NRFC, NARH, NARG, HCR, NRFA, TORC, HYBB, GLPC, MIOC, YSAA, APPB, CYBC, YCCM, FDOI, FIXC, TRXA, FIXB, FLDA, FDOH, YGCO                                                                                                                                                                                                                                 |
| GOTERM_BP_FAT        | GO:0006091~generation of precursor metabolites and energy | HYCB, FIXX, NRFD, NUOG, NRFB, NRFC, NRFF, NRFG, NARH, NARG, NIKD, NARJ, HYCA, GLTA, PGK, GLGB, HYBG, PDXK, HYBC, HYBB, HYBO, GLPC, NUOH, YSAA, NUOI, GLGP, NUOJ, PDXY, YCCM, APPB, FDOI, TRXA, DLD, FDOG, FDOH, YGCO, PFKB, YJJW, NAPH, NAPF, NAPD, FBAA, NAPA, YTJC, MENB, MENC, HCR, MENE, NRFA, TORC, MIOC, TORR, GPSA, CYBC, YBIY, FIXC, TORT, FIXB, NIRD, ZRAS, FLDA, ZRAR, GLK, RHO |
| GOTERM_BP_FAT        | GO:0022900~electron transport chain                       | HYCB, FIXX, NAPH, NAPF, NAPA, NUOG, NRFB, NRFC, NARH, NARG, HCR, NRFA, TORC, HYBB, GLPC, MIOC, YSAA, APPB, CYBC, YCCM, FDOI, FIXC, TRXA, FIXB, FLDA, FDOH, YGCO                                                                                                                                                                                                                           |
| GOTERM_MF_FAT        | GO:0009055~electron carrier activity                      | YJJW, HYCB, NAPH, NAPF, NAPA, BISC, NUOG, NRFC, GOR, HEMG, YJES, NARG, AEGA, YKGG, YJHC, HCR, HCP, HYBA, TORC, GLPC, NUOI, YSAA, TAUD, YCCM, CYBC, FDOI, TRXA, FIXB, NIRD, FLDA, FDOG, FDOH, YGCO                                                                                                                                                                                         |

|                      |                                    |                                                           |
|----------------------|------------------------------------|-----------------------------------------------------------|
|                      | Enrichment Score:                  |                                                           |
| Annotation Cluster 8 | 7.671568463193634                  |                                                           |
| Category             | Term                               | Genes                                                     |
| KEGG_PATHWAY         | eco00670:One carbon pool by folate | PURH, PURT, FOLA, METH, FOLM, GCVT, FMT, GLYA, THYA, FOLD |

|                      |                                                                   |                                                                                                                                                                                   |
|----------------------|-------------------------------------------------------------------|-----------------------------------------------------------------------------------------------------------------------------------------------------------------------------------|
|                      | Enrichment Score:                                                 |                                                                                                                                                                                   |
| Annotation Cluster 9 | 6.980994383574671                                                 |                                                                                                                                                                                   |
| Category             | Term                                                              | Genes                                                                                                                                                                             |
| SP_PIR_KEYWORDS      | phosphoprotein                                                    | CITD, HTPG, KDPD, NAGE, ENVZ, YTJC, FRYA, UHPB, DPIA, RCSD, CREB, EVGA, CYSK, ENTF, YFHK, ALR, ARCA, GLYA, CAIC, GLGP, TORR, GCVP, YFHA, EVGS, BAER, ZRAS, FDOG, ZRAR, OMPR, BASR |
| KEGG_PATHWAY         | ecd02020:Two-component system                                     | CITD, KDPD, ENVZ, UHPB, DPIA, NARH, NARG, NARJ, RCSD, RCSF, CREB, EVGA, YFHK, TORC, ARCA, TORR, DEGP, YFHA, CITT, BAER, ZRAS, ZRAR, OMPR, BASR, CUSA                              |
| INTERPRO             | IPR001789:Signal transduction response regulator, receiver region | TORR, EVGA, DPIA, YFHA, EVGS, BAER, ZRAR, ARCA, OMPR, CREB, BASR                                                                                                                  |
| UP_SEQ_FEATURE       | domain:Response regulatory                                        | TORR, EVGA, DPIA, YFHA, EVGS, BAER, ZRAR, ARCA, OMPR, CREB, BASR                                                                                                                  |

| Enrichment Score:     |                                               |                                                                                                                                                                                                                                                                                                                                                                                                                                                                                                                                                                                           |
|-----------------------|-----------------------------------------------|-------------------------------------------------------------------------------------------------------------------------------------------------------------------------------------------------------------------------------------------------------------------------------------------------------------------------------------------------------------------------------------------------------------------------------------------------------------------------------------------------------------------------------------------------------------------------------------------|
| Annotation Cluster    | Term                                          | Genes                                                                                                                                                                                                                                                                                                                                                                                                                                                                                                                                                                                     |
| Annotation Cluster 10 | 6.499500185419999                             |                                                                                                                                                                                                                                                                                                                                                                                                                                                                                                                                                                                           |
| Category              |                                               |                                                                                                                                                                                                                                                                                                                                                                                                                                                                                                                                                                                           |
| SP_PIR_KEYWORDS       | nucleotide-binding                            | ASPS, AAS, HTPG, SURE, PSTB, YOAA, MALK, NIKD, RARA, NANK, PGK, ENTF, TMK, YFHK, TOPA, HOFB, TOPB, PDXK, GLTX, MNMA, THIK, YBCF, RECF, PDXY, YFHA, YDCT, RIBA, EUTP, PURT, LPTB, DNAC, GSIA, KDPD, GYRB, NRDR, YEGD, DHAR, UHPB, MOAA, GLNQ, GLNS, RCSD, DGOK, GMK, GARK, GLNE, COAE, TAUB, PRPR, ISPE, DBPA, PHR, PCNB, COAD, PRIA, FOLE, GLK, RHO, FHUC, CPDB, PRS, PRPE, METL, SECA, HDA, SSUB, GLXK, YIHA, YKFA, PURL, MDLA, FEOB, PURD, PROB, PURC, YGHT, EVGS, HSDR, GSHA, PFKB, USHA, HISS, YBHF, ENVZ, YJG, RFAY, FTSZ, SUFC, MENE, MAK, DDLB, IDNK, RSGA, HFLB, CYSS, ZRAS, ZRAR |
| SP_PIR_KEYWORDS       | atp-binding                                   | FHUC, ASP, AAS, PRS, HTPG, PRPE, METL, PSTB, YOAA, SECA, MALK, SSUB, NIKD, RARA, NANK, GLXK, PGK, TMK, ENTF, TOPA, YFHK, HOFB, PDXK, TOPB, PURL, GLTX, THIK, MNMA, MDLA, PROB, PURD, PURC, YBCF, RECF, PDXY, YGHT, YFHA, EVGS, YDCT, GSHA, HSDR, EUTP, PFKB, PURT, LPTB, GSIA, DNAC, HISS, YPJA, KDPD, YBHF, GYRB, ENVZ, NRDR, YEGD, DHAR, UHPB, GLNQ, RFAY, GLNS, RCSD, GMK, DGOK, GARK, GLNE, SUFC, MENE, COAE, MAK, DDLB, TAUB, IDNK, PRPR, ISPE, HFLB, DBPA, CYSS, PCNB, ZRAS, ZRAR, COAD, PRIA, GLK, RHO                                                                             |
| Enrichment Score:     |                                               |                                                                                                                                                                                                                                                                                                                                                                                                                                                                                                                                                                                           |
| Annotation Cluster 11 | 5.90301100354393                              |                                                                                                                                                                                                                                                                                                                                                                                                                                                                                                                                                                                           |
| Category              |                                               |                                                                                                                                                                                                                                                                                                                                                                                                                                                                                                                                                                                           |
| GOTERM_BP_FAT         | GO:0016051~carbohydrate biosynthetic process  | NANE, FTSI, BCSA, NAGE, YTJC, NANA, WAAU, FTSW, MRCB, LPXL, NANT, RFAZ, NAGB, RFAY, NAGA, PBPG, SDAB, SDAA, GALE, NANK, LPXH, RCSF, PGK, GLGB, RFAI, RFAJ, DDLB, WCAC, ALR, KDSB, CLD, RFC, WZXC, GLGP, GPSA, GLMU, MRDA, MURG, MURI, AGAW, GLF, AMIA, RFBX, EPD                                                                                                                                                                                                                                                                                                                          |
| Enrichment Score:     |                                               |                                                                                                                                                                                                                                                                                                                                                                                                                                                                                                                                                                                           |
| Annotation Cluster 12 | 5.792713598893311                             |                                                                                                                                                                                                                                                                                                                                                                                                                                                                                                                                                                                           |
| Category              |                                               |                                                                                                                                                                                                                                                                                                                                                                                                                                                                                                                                                                                           |
| KEGG_PATHWAY          | ecd00240:Pyrimidine metabolism                | USHA, TMK, UPP, CPDB, SURE, YJG, PYRF, DNAQ, HOLD, HOLB, PYRD, RPOZ, THYA, DUT                                                                                                                                                                                                                                                                                                                                                                                                                                                                                                            |
| Enrichment Score:     |                                               |                                                                                                                                                                                                                                                                                                                                                                                                                                                                                                                                                                                           |
| Annotation Cluster 13 | 5.24850957400413                              |                                                                                                                                                                                                                                                                                                                                                                                                                                                                                                                                                                                           |
| Category              |                                               |                                                                                                                                                                                                                                                                                                                                                                                                                                                                                                                                                                                           |
| KEGG_PATHWAY          | eco00860:Porphyrin and chlorophyll metabolism | HEMB, HEMC, HEMD, CYSG, GLTX, UIDA, HEMG, HEMH, HEMX, HEMN                                                                                                                                                                                                                                                                                                                                                                                                                                                                                                                                |
| Enrichment Score:     |                                               |                                                                                                                                                                                                                                                                                                                                                                                                                                                                                                                                                                                           |
| Annotation Cluster 14 | 5.150728776157705                             |                                                                                                                                                                                                                                                                                                                                                                                                                                                                                                                                                                                           |
| Category              |                                               |                                                                                                                                                                                                                                                                                                                                                                                                                                                                                                                                                                                           |
| SP_PIR_KEYWORDS       | heme                                          | NRFB, APPB, NRFA, CYBC, FDOI, NRFF, BFR, TORC, HYBB, EFEB, DOS, CCMH                                                                                                                                                                                                                                                                                                                                                                                                                                                                                                                      |

|               |                                                        |                                                                                                                 |
|---------------|--------------------------------------------------------|-----------------------------------------------------------------------------------------------------------------|
| GOTERM_BP_FAT | GO:0043933~macromolecular complex subunit organization | RPOH, NRFA, TORC, NUSB, HYBB, RPON, PRFA, SECB, NRFB, CYBC, FDOI, NRFF, RPOS, NRFG, FTSZ, CCMG, CCMH, RHO, CCMF |
| GOTERM_BP_FAT | GO:0070271~protein complex biogenesis                  | RPOH, NRFA, TORC, HYBB, RPON, NRFB, SECB, CYBC, FDOI, NRFF, RPOS, FTSZ, NRFG, CCMG, CCMH, CCMF                  |
| GOTERM_BP_FAT | GO:0017004~cytochrome complex assembly                 | NRFB, NRFA, CYBC, FDOI, NRFF, TORC, HYBB, NRFG, CCMG, CCMH, CCMF                                                |

|                       |                                     |                                                                                                                                                                                       |
|-----------------------|-------------------------------------|---------------------------------------------------------------------------------------------------------------------------------------------------------------------------------------|
| Annotation Cluster 15 | Enrichment Score: 4.665546389601961 |                                                                                                                                                                                       |
| Category              | Term                                | Genes                                                                                                                                                                                 |
| SP_PIR_KEYWORDS       | magnesium                           | PURT, PPX, RPPH, UPP, PRS, TATD, SURE, FRYA, YJJG, HEMB, DNAQ, GUDD, DXS, DINB, RUVC, GMK, MENC, PURF, PDXK, GARL, DDLB, HPT, PTSP, GCL, KDSB, PURD, GLMU, DOS, RIBA, YBIV, YFAU, DUT |

|                       |                                     |                                                                                                                                                                                                                                                                                                                                                     |
|-----------------------|-------------------------------------|-----------------------------------------------------------------------------------------------------------------------------------------------------------------------------------------------------------------------------------------------------------------------------------------------------------------------------------------------------|
| Annotation Cluster 16 | Enrichment Score: 4.484340146938689 |                                                                                                                                                                                                                                                                                                                                                     |
| Category              | Term                                | Genes                                                                                                                                                                                                                                                                                                                                               |
| SP_PIR_KEYWORDS       | iron                                | FHUC, FHUD, HYCB, DEF, FIXX, FES, NUOG, NRFB, MHPB, NRFC, NRFF, BFR, NARH, HEMH, NARG, HEMN, FHUB, FHUA, ENTF, HYBC, HYBA, HYBB, HYBO, FEOB, GLPC, YSAA, NUOI, RUMA, YCCM, APPB, FDOI, YGCF, DOS, FDOG, FDOH, YGCO, YJJW, NAPH, NFUA, NAPF, EFEB, ISPG, NAPA, DPS, MOAA, YJES, SDAB, SDAA, AEGA, HCR, HCP, NRFA, TORC, GARL, TAUD, CYBC, YBIY, CCMH |
| SP_PIR_KEYWORDS       | 4fe-4s                              | YJJW, HYCB, FIXX, NAPH, NFUA, NAPF, ISPG, NAPA, NUOG, NRFC, MOAA, NARH, SDAB, YJES, NARG, SDAA, AEGA, HEMN, HYBA, HYBO, GLPC, NUOI, YSAA, RUMA, YCCM, YBIY, YGCF, FDOG, FDOH                                                                                                                                                                        |

|                       |                                      |                                                                                                                                                                     |
|-----------------------|--------------------------------------|---------------------------------------------------------------------------------------------------------------------------------------------------------------------|
| Annotation Cluster 17 | Enrichment Score: 3.9173645522070517 |                                                                                                                                                                     |
| Category              | Term                                 | Genes                                                                                                                                                               |
| SP_PIR_KEYWORDS       | ATP                                  | FHUC, LPTB, ASPS, GSIA, HISS, GYRB, BISC, PSTB, HTPX, SECA, MALK, GLNQ, SSUB, GLNS, NIKD, MDTF, PGK, GMK, TMK, SUFC, HOFB, GLTX, MDLA, CAIC, DBPA, CYSS, HSDR, PRIA |
| KEGG_PATHWAY          | eco02010:ABC transporters            | FHUC, LPTB, FHUD, GSIB, GSIA, TAUC, MALF, TAUB, MALG, AFUB, MALE, PSTC, YADH, PSTB, PROX, ALSB, MALK, GLNQ, SSUB, NIKD, NIKB, NIKC, FHUB, NIKA                      |

|               |                                                                       |                                                                                                                                   |
|---------------|-----------------------------------------------------------------------|-----------------------------------------------------------------------------------------------------------------------------------|
| GOTERM_MF_FAT | GO:0042625~ATPase activity, coupled to transmembrane movement of ions | NIKD, NIKB, NIKC, NIKA, PSTB                                                                                                      |
| INTERPRO      | IPR017871:ABC transporter, conserved site                             | FHUC, LPTB, SUFC, GSIA, MDLA, TAUB, YBHF, PSTB, MALK, SSUB, GLNQ, YDCT, NIKD                                                      |
| INTERPRO      | IPR003593:ATPase, AAA+ type, core                                     | FHUC, LPTB, HOFB, SUFC, GSIA, DNAC, MDLA, YBHF, TAUB, PSTB, PRPR, DHAR, MALK, SSUB, HFLB, GLNQ, YFHA, YDCT, RARA, NIKD, ZRAR, RHO |

|                       |                                                                                     |                                                                                                                                                                                                                                                                                                                                                                                                                   |
|-----------------------|-------------------------------------------------------------------------------------|-------------------------------------------------------------------------------------------------------------------------------------------------------------------------------------------------------------------------------------------------------------------------------------------------------------------------------------------------------------------------------------------------------------------|
| GOTERM_MF_FAT         | GO:0016887~ATPase activity                                                          | FHUC, LPTB, SUFC, GSIA, MDLA, YBHF, TAUB, YADH, PSTB, YOAA, MALK, SSUB, HFLB, GLNQ, DBPA, YDCT, NIKD, NIKB, PRIA, NIKC, NIKA                                                                                                                                                                                                                                                                                      |
| Annotation Cluster 18 | Enrichment Score:<br>3.868061177406305                                              |                                                                                                                                                                                                                                                                                                                                                                                                                   |
| Category              | Term                                                                                | Genes                                                                                                                                                                                                                                                                                                                                                                                                             |
| KEGG_PATHWAY          | ecv00230:Purine metabolism                                                          | PURH, PURT, USHA, PURF, PPX, PURL, CPDB, HPT, PURD, SURE, PURC, PURB, YJJG, DNAQ, GUAB, HOLB, ADE, RPOZ, GMK, ALLD                                                                                                                                                                                                                                                                                                |
| Annotation Cluster 19 | Enrichment Score:<br>3.8210636025927815                                             |                                                                                                                                                                                                                                                                                                                                                                                                                   |
| Category              | Term                                                                                | Genes                                                                                                                                                                                                                                                                                                                                                                                                             |
| SP_PIR_KEYWORDS       | carbon-oxygen lyase                                                                 | CYSK, CAIB, HEMB, HEMD, GUDD, CYNS, SDAB, AROD, SDAA                                                                                                                                                                                                                                                                                                                                                              |
| SP_PIR_KEYWORDS       | hydro-lyase                                                                         | CAIB, HEMB, HEMD, GUDD, CYNS, SDAB, AROD, SDAA                                                                                                                                                                                                                                                                                                                                                                    |
| Annotation Cluster 20 | Enrichment Score:<br>3.819127034274014                                              |                                                                                                                                                                                                                                                                                                                                                                                                                   |
| Category              | Term                                                                                | Genes                                                                                                                                                                                                                                                                                                                                                                                                             |
| GOTERM_BP_FAT         | GO:0044271~nitrogen compound biosynthetic process                                   | UPP, YGIF, PRS, MOG, METL, PROX, HEMB, METH, HEMC, HEMD, HEMG, HEMH, DXS, HEMN, PURH, TMK, PURF, PURL, PABC, ALR, GLYA, HEMX, RHTC, PROB, QUEC, PURD, PURC, YBCF, PURB, PROC, PYRF, RIBD, AROG, RIBE, PYRD, AROD, RIBA, THYA, PURT, CADB, ASD, ILVL, NAPA, ILVC, BISC, SPEC, MOAD, TYRB, MOAA, GLNQ, SDAC, GALE, AEGA, GMK, CYSK, NADC, IVBL, CYSG, HPT, WRBA, DAPF, FOLA, GUAB, ILVY, MTN, FOLE, FOLD, RHO, HISL |
| SP_PIR_KEYWORDS       | amino-acid biosynthesis                                                             | CYSK, IVBL, ASD, ILVL, PROB, DAPF, ILVC, METL, PROC, METH, TYRB, AROG, AROD, MTN, ILVY, FOLD, HISL                                                                                                                                                                                                                                                                                                                |
| Annotation Cluster 21 | Enrichment Score:<br>3.644975593106647                                              |                                                                                                                                                                                                                                                                                                                                                                                                                   |
| Category              | Term                                                                                | Genes                                                                                                                                                                                                                                                                                                                                                                                                             |
| GOTERM_BP_FAT         | GO:0006766~vitamin metabolic process                                                | FIXX, BISC, DXS, GALE, MENB, MENC, CAIB, NADC, PDXK, MENE, CYSG, PABC, DKGB, GLYA, CAIE, PDXY, SELA, FOLA, FIXC, RIBD, FIXB, RIBE, RIBA, FOLE, FOLD, EPD                                                                                                                                                                                                                                                          |
| Annotation Cluster 22 | Enrichment Score:<br>3.6307365196164296                                             |                                                                                                                                                                                                                                                                                                                                                                                                                   |
| Category              | Term                                                                                | Genes                                                                                                                                                                                                                                                                                                                                                                                                             |
| KEGG_PATHWAY          | eck00910:Nitrogen metabolism                                                        | NRFA, NIRD, TNA, CYNS, NARH, NARG, GCVT, NAPA, NARJ, YBCF                                                                                                                                                                                                                                                                                                                                                         |
| GOTERM_MF_FAT         | GO:0016661~oxidoreductase activity, acting on other nitrogenous compounds as donors | NRFB, NRFC, NRFA, HCP, NAPH, NIRD, NARH, NAPD, NARG, NAPA, NARJ                                                                                                                                                                                                                                                                                                                                                   |

|                       |                                                   |                                                     |
|-----------------------|---------------------------------------------------|-----------------------------------------------------|
| Annotation Cluster 23 | Enrichment Score:<br>3.483537224371926            |                                                     |
| Category              | Term                                              | Genes                                               |
| KEGG_PATHWAY          | eum00260:Glycine, serine and threonine metabolism | GARK, ASD, GCVP, SDAB, GCVT, SDAA, GLYA, GLXK, METL |

|                       |                                                                 |                                                |
|-----------------------|-----------------------------------------------------------------|------------------------------------------------|
| Annotation Cluster 24 | Enrichment Score:<br>3.1512856893410395                         |                                                |
| Category              | Term                                                            | Genes                                          |
| SP_PIR_KEYWORDS       | phosphate transport                                             | PSTC, PHOU, PSTB                               |
| INTERPRO              | IPR005670:Phosphate transport system permease protein 1         | PSTB                                           |
| INTERPRO              | IPR015850:ABC transporter, phosphate import, PstB               | PSTB                                           |
| GOTERM_MF_FAT         | GO:0015415~phosphate transmembrane-transporting ATPase activity | PSTB                                           |
| GOTERM_BP_FAT         | GO:0015698~inorganic anion transport                            | CYST, SSEA, PSTC, PHOU, NARK, YCHM, YFEO, PSTB |

|                       |                                                      |                                                                       |
|-----------------------|------------------------------------------------------|-----------------------------------------------------------------------|
| Annotation Cluster 25 | Enrichment Score:<br>3.1181401056680267              |                                                                       |
| Category              | Term                                                 | Genes                                                                 |
| GOTERM_BP_FAT         | GO:0046349~amino sugar biosynthetic process          | MRCB, NANE, NANT, NAGB, MURG, NAGA, AGAW, NAGE, NANK, NANA            |
| KEGG_PATHWAY          | ecj00520:Amino sugar and nucleotide sugar metabolism | NANE, GLMU, NAGB, MAK, NAGA, GALE, NAGE, NANK, NANA, YAGH, GLK        |
| SP_PIR_KEYWORDS       | carbohydrate metabolism                              | NANE, RHAM, NAGB, MAK, NAGA, NANM, GALE, GALR, NANK, NANA, GLPX, GLGP |

|                       |                                             |                                                                                                              |
|-----------------------|---------------------------------------------|--------------------------------------------------------------------------------------------------------------|
| Annotation Cluster 26 | Enrichment Score:<br>2.958892606400057      |                                                                                                              |
| Category              | Term                                        | Genes                                                                                                        |
| KEGG_PATHWAY          | ecj00270:Cysteine and methionine metabolism | CYSK, METH, ASD, TYRB, SDAB, SSEA, SDAA, MTN, METL                                                           |
| GOTERM_BP_FAT         | GO:0006790~sulfur metabolic process         | CYSK, ASD, TAUC, TAUB, SSEA, YBBB, TAUD, METL, BISC, SUFS, METH, MOAD, GOR, SSUB, SSUD, GSHA, DXS, MTN, FOLD |

|                       |                                         |                                                                                    |
|-----------------------|-----------------------------------------|------------------------------------------------------------------------------------|
| Annotation Cluster 27 | Enrichment Score:<br>2.852257349266379  |                                                                                    |
| Category              | Term                                    | Genes                                                                              |
| GOTERM_BP_FAT         | GO:0006631~fatty acid metabolic process | FABD, FABF, PRPE, PRPB, MHPC, PRPR, FABG, MHPA, FABH, MHPB, ACCB, ACPH, SDAB, FADL |

|                       |                                                                                                            |                                                                                                                      |
|-----------------------|------------------------------------------------------------------------------------------------------------|----------------------------------------------------------------------------------------------------------------------|
| Annotation Cluster 28 | Enrichment Score:<br>2.756736845637827                                                                     |                                                                                                                      |
| Category              | Term                                                                                                       | Genes                                                                                                                |
| SP_PIR_KEYWORDS       | palmitate                                                                                                  | GFCE, YFHM, NLPE, YIAD, PGAB, YAFT, YEDD, BAMD, BAMB, MDTE, YBJP, OSMB, YAJG, YAJI, ACRE                             |
| GOTERM_CC_FAT         | GO:0031225~anchored to membrane                                                                            | YFHM, NLPE, YIAD, PGAB, YAFT, YEDD, BAMD, BAMB, MDTE, YBJP, OSMB, YAJG, YAJI, ACRE, YPFN                             |
| SP_PIR_KEYWORDS       | lipoprotein                                                                                                | GFCE, YFHM, NLPE, YIAD, PGAB, YADE, YAFT, YEDD, BAMD, LOLA, BAMB, MDTE, YBJP, OSMB, YAJG, YAJI, ACRE                 |
| Annotation Cluster 29 | Enrichment Score:<br>2.722013632090176                                                                     |                                                                                                                      |
| Category              | Term                                                                                                       | Genes                                                                                                                |
| INTERPRO              | IPR002509:Polysaccharide deacetylase                                                                       | PGAB, YADE                                                                                                           |
| Annotation Cluster 30 | Enrichment Score:<br>2.561717609579521                                                                     |                                                                                                                      |
| Category              | Term                                                                                                       | Genes                                                                                                                |
| KEGG_PATHWAY          | ecg00564:Glycerophospholipid metabolism                                                                    | GPSA, AAS, GLPC, PGSA, EUTB, PLSB                                                                                    |
| Annotation Cluster 31 | Enrichment Score:<br>2.5547766226192237                                                                    |                                                                                                                      |
| Category              | Term                                                                                                       | Genes                                                                                                                |
| KEGG_PATHWAY          | ecq00630:Glyoxylate and dicarboxylate metabolism                                                           | GARK, FDOI, GARR, GCL, FDOG, FDOH, GLXK, GLTA, FOLD                                                                  |
| KEGG_PATHWAY          | ecv00680:Methane metabolism                                                                                | FDOI, FDOG, FDOH, GLYA                                                                                               |
| SP_PIR_KEYWORDS       | heterotrimer                                                                                               | FDOI, FDOG, FDOH                                                                                                     |
| GOTERM_MF_FAT         | GO:0016620~oxidoreductase activity, acting on the aldehyde or oxo group of donors, NAD or NADP as acceptor | ASD, FDOI, FDOG, FDOH, YSAA, EPD                                                                                     |
| Annotation Cluster 32 | Enrichment Score:<br>2.5404935542735196                                                                    |                                                                                                                      |
| Category              | Term                                                                                                       | Genes                                                                                                                |
| GOTERM_BP_FAT         | GO:0009451~RNA modification                                                                                | YBEA, RSMF, MNMA, LIGT, MNMG, QUEC, DTD, RRMJ, RUMA, SELA, RLUC, DBPA, RLUD, RLUA, PCNB, RLUB, TRUD, RLMF, FMT, RSUA |
| SP_PIR_KEYWORDS       | rrna processing                                                                                            | RUMA, YBEA, RSMF, RLUC, RLUD, RLUA, RLUB, RLMF, RSUA, GIDB, RRMJ                                                     |
| GOTERM_BP_FAT         | GO:0022613~ribonucleoprotein in complex biogenesis                                                         | YBEA, RSMF, RRMJ, RUMA, RMF, RNC, RLUC, RLUD, DBPA, RLUA, RLUB, RLMF, RSUA, GIDB                                     |



|                       |                                                             |                                                                                                                                      |
|-----------------------|-------------------------------------------------------------|--------------------------------------------------------------------------------------------------------------------------------------|
| GOTERM_BP_FAT         | GO:0042254~ribosome biogenesis                              | YBEA, RSMF, RRMJ, RUMA, RMF, RNC, RLUC, RLUD, DBPA, RLUA, RLUB, RLMF, RSUA, GIDB                                                     |
| GOTERM_BP_FAT         | GO:0034470~ncRNA processing                                 | YBEA, RSMF, MNMA, MNMG, DUSC, QUEC, RRMJ, RUMA, RBN, RLUC, RNC, RLUD, KPTA, RLUA, RLUB, TRUD, RLMF, RSUA, GIDB, RPH                  |
| GOTERM_BP_FAT         | GO:0006399~tRNA metabolic process                           | ASPS, GLTX, HISS, MNMA, MNMG, DUSC, QUEC, RBN, GLNS, KPTA, RLUA, CYSS, TRUD, RPH                                                     |
| GOTERM_BP_FAT         | GO:0008033~tRNA processing                                  | RBN, KPTA, MNMA, RLUA, TRUD, MNMG, DUSC, QUEC, RPH                                                                                   |
| GOTERM_BP_FAT         | GO:0006400~tRNA modification                                | MNMA, TRUD, MNMG, QUEC                                                                                                               |
| Annotation Cluster 33 | Enrichment Score: 2.5101008116264243                        |                                                                                                                                      |
| Category              | Term                                                        | Genes                                                                                                                                |
| KEGG_PATHWAY          | ecg00230:Purine metabolism                                  | PURH, PURT, USHA, PURF, PPX, PURL, CPDB, PRS, HPT, GUAD, PURD, SURE, PURC, YBCF, PURB, YJJG, DNAQ, GUAB, HOLD, HOLB, RPOZ, GMK, ALLD |
| Annotation Cluster 34 | Enrichment Score: 2.4682438929724873                        |                                                                                                                                      |
| Category              | Term                                                        | Genes                                                                                                                                |
| KEGG_PATHWAY          | ecj00500:Starch and sucrose metabolism                      | GLGB, MAK, UIDA, BCSA, YAGH, BGLX, GLK, GLGP                                                                                         |
| Annotation Cluster 35 | Enrichment Score: 2.400942183093628                         |                                                                                                                                      |
| Category              | Term                                                        | Genes                                                                                                                                |
| GOTERM_BP_FAT         | GO:0009437~carnitine metabolic process                      | CAIB, FIXC, FIXX, FIXB, CAIE                                                                                                         |
| GOTERM_BP_FAT         | GO:0006575~cellular amino acid derivative metabolic process | CAIB, FIXX, CAIE, WRBA, PROX, SPEC, METH, GOR, FIXC, FIXB, TNAА, GSHA, MTN, EUTP                                                     |
| GOTERM_BP_FAT         | GO:0006576~biogenic amine metabolic process                 | PROX, SPEC, CAIB, FIXC, FIXX, FIXB, TNAА, EUTP, WRBA, CAIE                                                                           |
| Annotation Cluster 36 | Enrichment Score: 2.36996752030282                          |                                                                                                                                      |
| Category              | Term                                                        | Genes                                                                                                                                |
| SP_PIR_KEYWORDS       | protein biosynthesis                                        | RPMG, ASPS, DEF, GLTX, HISS, RPLB, RPMB, MAP, PRFA, RPSR, SELA, GLNS, CYSS, FMT, RPSF                                                |
| KEGG_PATHWAY          | ecc00970:Aminoacyl-tRNA biosynthesis                        | SELA, ASPS, GLTX, HISS, GLNS, CYSS, FMT                                                                                              |
| UP_SEQ_FEATURE        | short sequence motif:"KMSKS" region                         | GLTX, GLNS, CYSS                                                                                                                     |

|                       |                                                |                                                                                                                                                                                                                                      |
|-----------------------|------------------------------------------------|--------------------------------------------------------------------------------------------------------------------------------------------------------------------------------------------------------------------------------------|
| UP_SEQ_FEATURE        | short sequence motif:"HIGH"                    |                                                                                                                                                                                                                                      |
| UP_SEQ_FEATURE        | region                                         | GLTX, GLNS, CYSS                                                                                                                                                                                                                     |
| UP_SEQ_FEATURE        | binding site:ATP                               | PURT, GLTX, GLNS, CYSS, ENVZ, PGK                                                                                                                                                                                                    |
| Annotation Cluster 37 | Enrichment Score:<br>2.2459984921705636        |                                                                                                                                                                                                                                      |
| Category              | Term                                           | Genes                                                                                                                                                                                                                                |
| GOTERM_BP_FAT         | GO:0030258~lipid modification                  | MHPC, PRPR, MHPA, MHPB, MURG, SDAB, PRPE, FADL, PRPB                                                                                                                                                                                 |
| GOTERM_BP_FAT         | GO:0006631~fatty acid metabolic process        | FABD, FABF, PRPE, PRPB, MHPC, PRPR, FABG, MHPA, FABH, MHPB, ACCB, ACPH, SDAB, FADL                                                                                                                                                   |
| Annotation Cluster 38 | Enrichment Score:<br>2.183676519902815         |                                                                                                                                                                                                                                      |
| Category              | Term                                           | Genes                                                                                                                                                                                                                                |
| SP_PIR_KEYWORDS       | cell wall biogenesis/degradation               | FTSW, MRCB, GLMU, MRDA, MURG, MURI, FTSI, PBPG, DDLB, ALR, AMPD, AMIA                                                                                                                                                                |
| SP_PIR_KEYWORDS       | cell shape                                     | FTSW, MRCB, GLMU, YFGA, MRDA, MURG, MURI, FTSI, PBPG, DDLB, ALR                                                                                                                                                                      |
| GOTERM_BP_FAT         | GO:0000271~polysaccharide biosynthetic process | FTSI, BCSA, WAAU, FTSW, MRCB, LPXL, RFAZ, RFAY, PBPG, GALE, RCSF, LPXH, GLGB, RFAI, RFAJ, WCAC, DDLB, ALR, KDSB, RFC, CLD, WZXC, GLGP, GLMU, MRDA, MURG, MURI, GLF, AMIA, RFBX                                                       |
| GOTERM_BP_FAT         | GO:0005976~polysaccharide metabolic process    | YEGX, FTSI, BCSA, AMPD, WAAU, FTSW, MRCB, LPXL, RFAZ, RFAY, PBPG, GALE, RCSF, LPXH, GLGB, RFAI, RFAJ, DDLB, WCAC, ALR, KDSB, CLD, RFC, WZXC, YAGH, GLGP, GLMU, MRDA, MURG, MURI, GLF, AMIA, RFBX                                     |
| Annotation Cluster 39 | Enrichment Score:<br>2.177248588246868         |                                                                                                                                                                                                                                      |
| Category              | Term                                           | Genes                                                                                                                                                                                                                                |
| SP_PIR_KEYWORDS       | nadp                                           | ASD, YDBC, DKGB, ILVC, METL, PROC, FOLA, FABG, GOR, RIBD, FOLM, NEMA, FOLD                                                                                                                                                           |
| GOTERM_MF_FAT         | GO:0050661~NADP or NADPH binding               | FOLA, ASD, GOR, RIBD, ILVC, METL                                                                                                                                                                                                     |
| UP_SEQ_FEATURE        | nucleotide phosphate-binding region:NADP       | FOLA, FABG, YDBC, RIBD, DKGB, METL                                                                                                                                                                                                   |
| Annotation Cluster 40 | Enrichment Score:<br>2.151861868815369         |                                                                                                                                                                                                                                      |
| Category              | Term                                           | Genes                                                                                                                                                                                                                                |
| SP_PIR_KEYWORDS       | nickel                                         | HYCI, HYBC, NIKD, NIKB, NIKC, SURE, YFAU, NIKR, NIKA                                                                                                                                                                                 |
| SP_PIR_KEYWORDS       | ion transport                                  | FHUC, GFCE, ENTF, FHUD, NANC, ZITB, FEOB, FES, YFEO, TRKH, YJCE, ZUPT, LAMB, NMPC, FHUB, YDAN, CUSA, BTUB, FHUA                                                                                                                      |
| SP_PIR_KEYWORDS       | iron transport                                 | FHUC, ENTF, FHUD, FEOB, FES, TONB, FHUB, FHUA                                                                                                                                                                                        |
| GOTERM_BP_FAT         | GO:0006811~ion transport                       | GFCE, FHUC, FHUD, NANC, ZITB, YFEH, PSTC, FES, YGHZ, YFEO, PSTB, YJCE, TRKH, TTD, YEBZ, UIDB, BFR, LAMB, NMPC, NIKD, NIKB, PHOU, NIKC, YCHM, NARK, FHUB, BTUB, FHUA, ENTF, SSEA, FEOB, TONB, ZUPT, CITT, CYST, YAAJ, YDAN, CUSA, RHO |

|                       |                                         |                        |
|-----------------------|-----------------------------------------|------------------------|
| Annotation Cluster 41 | Enrichment Score:<br>2.1404886401160224 |                        |
| Category              | Term                                    | Genes                  |
| SP_PIR_KEYWORDS       | gluconate utilization                   | GNTP, IDNT, IDNR, IDNK |

|                       |                                         |                                                                                                |
|-----------------------|-----------------------------------------|------------------------------------------------------------------------------------------------|
| Annotation Cluster 42 | Enrichment Score:<br>2.0870405775145575 |                                                                                                |
| Category              | Term                                    | Genes                                                                                          |
| SP_PIR_KEYWORDS       | Flavoprotein                            | HCR, YDDH, MNMG, GCL, DUSC, WRBA, MIOC, MHPA, GOR, FIXC, FIXB, PYRD, PHR, DLD, GLF, FLDA, NEMA |
| SP_PIR_KEYWORDS       | FAD                                     | HCR, MHPA, GOR, FIXC, FIXB, DLD, PHR, MNMG, GLF, GCL, DUSC                                     |
| UP_SEQ_FEATURE        | nucleotide phosphate-binding region:FAD | MHPA, GOR, FIXB, PHR, MNMG, GLF                                                                |
| GOTERM_MF_FAT         | GO:0050660~FAD binding                  | GOR, FIXB, DLD, MNMG, DUSC, AEGA                                                               |

|                       |                                                  |                  |
|-----------------------|--------------------------------------------------|------------------|
| Annotation Cluster 43 | Enrichment Score:<br>2.08637279835233            |                  |
| Category              | Term                                             | Genes            |
| KEGG_PATHWAY          | ecj01040:Biosynthesis of unsaturated fatty acids | FABG, TESA, TESB |

|                       |                                        |                                                                       |
|-----------------------|----------------------------------------|-----------------------------------------------------------------------|
| Annotation Cluster 44 | Enrichment Score:<br>2.014401750999762 |                                                                       |
| Category              | Term                                   | Genes                                                                 |
| SP_PIR_KEYWORDS       | cell cycle                             | FTSW, KILR, HFLB, MURG, FTSZ, FTSI, YIIU, SLMA, YIHA, ACRE, FTSQ      |
| SP_PIR_KEYWORDS       | cell division                          | FTSW, FLK, KILR, HFLB, MURG, FTSZ, FTSI, YIIU, SLMA, YIHA, ACRE, FTSQ |

|                       |                                           |                              |
|-----------------------|-------------------------------------------|------------------------------|
| Annotation Cluster 45 | Enrichment Score:<br>2.001922235426106    |                              |
| Category              | Term                                      | Genes                        |
| SP_PIR_KEYWORDS       | phage recognition                         | LAMB, FADL, TONB, BTUB, FHUA |
| GOTERM_BP_FAT         | GO:0009581~detection of external stimulus | LAMB, FADL, TONB, BTUB, FHUA |

|                       |                                         |                                                                       |
|-----------------------|-----------------------------------------|-----------------------------------------------------------------------|
| Annotation Cluster 46 | Enrichment Score:<br>1.9872215232081591 |                                                                       |
| Category              | Term                                    | Genes                                                                 |
| SP_PIR_KEYWORDS       | rrna processing                         | RUMA, YBEA, RSMF, RLUC, RLUD, RLUA, RLUB, RLMF, RSUA, GIDB, RRMJ      |
| GOTERM_BP_FAT         | GO:0006364~rRNA processing              | RUMA, YBEA, RSMF, RLUC, RNC, RLUD, RLUA, RLUB, RLMF, RSUA, GIDB, RRMJ |
| GOTERM_BP_FAT         | GO:0016072~rRNA metabolic process       | RUMA, YBEA, RSMF, RLUC, RNC, RLUD, RLUA, RLUB, RLMF, RSUA, GIDB, RRMJ |

| Enrichment Score:     |                                          |                                                                                                                                                                                      |
|-----------------------|------------------------------------------|--------------------------------------------------------------------------------------------------------------------------------------------------------------------------------------|
| Annotation Cluster 47 | 1.8585074544206475                       |                                                                                                                                                                                      |
| Category              | Term                                     | Genes                                                                                                                                                                                |
| GOTERM_BP_FAT         | GO:0006261~DNA-dependent DNA replication | TOPA, TOPB, DNAC, GYRB, MIOC, RECF, DNAQ, HOLD, HDA, ROB, HOLB, DINB, PRIA, PRIB, RDGC                                                                                               |
| KEGG_PATHWAY          | eum03440:Homologous recombination        | DNAQ, HOLD, HOLB, RUVC, PRIA, PRIB, RECF                                                                                                                                             |
| KEGG_PATHWAY          | eco03430:Mismatch repair                 | XSEA, DNAQ, HOLD, HOLB, XSEB                                                                                                                                                         |
| GOTERM_MF_FAT         | GO:0004527~exonuclease activity          | XSEA, DNAQ, HOLD, RBN, HOLB, XSEB, RPH                                                                                                                                               |
| GOTERM_BP_FAT         | GO:0006260~DNA replication               | TOPA, TOPB, DNAC, GYRB, MIOC, RECF, DNAQ, DIAA, HOLD, HDA, HOLB, ROB, DINB, PRIA, PRIB, RDGC                                                                                         |
| SP_PIR_KEYWORDS       | exonuclease                              | XSEA, DNAQ, XSEB                                                                                                                                                                     |
| GOTERM_BP_FAT         | GO:0006259~DNA metabolic process         | DNAC, INTA, GYRB, DNAQ, HOLD, HDA, HOLB, ROB, YEGI, DINB, RUVC, YRDD, RECT, XSEA, YBAV, MUG, TOPA, TOPB, INSH, MIOC, RECF, XSEB, YBCK, DIAA, ENDA, PHR, HSDR, PRIA, PRIB, YKFG, RDGC |

| Enrichment Score:     |                          |                                                                                                                                                                                                                                                                                                                                                                                                                  |
|-----------------------|--------------------------|------------------------------------------------------------------------------------------------------------------------------------------------------------------------------------------------------------------------------------------------------------------------------------------------------------------------------------------------------------------------------------------------------------------|
| Annotation Cluster 48 | 1.849601035463412        |                                                                                                                                                                                                                                                                                                                                                                                                                  |
| Category              | Term                     | Genes                                                                                                                                                                                                                                                                                                                                                                                                            |
| SP_PIR_KEYWORDS       | activator                | CADC, GADE, EVGA, NHAR, AAER, CSPH, ARCA, ALLS, TORR, PRPR, DHAR, DPIA, RHAR, MELR, ZRAR, RHAS, ILVY, OMPR, BASR                                                                                                                                                                                                                                                                                                 |
| SP_PIR_KEYWORDS       | dna-binding              | YKGD, CSPH, CDAR, HUPB, YOAA, YGIT, ROB, DINB, ZUR, RECT, YJGJ, EVGA, NHAR, TOPA, TOPB, HSLR, AAER, ARCA, YPDC, RECF, NIKR, RACR, YFHA, MELR, HSDR, SLMA, BASR, YFHH, ASCG, GADE, YTFA, CADC, XYLR, NRDR, CSIR, ALLS, DPS, DHAR, DPIA, RHAR, RPOS, MTLR, HDFR, RHAS, HFQ, CREB, RCNR, RPOH, MUG, INSH, YBIH, DGOR, UIDR, RUTR, IDNR, RPON, GALR, YHAJ, TORR, PRPR, YIDZ, PHR, BAER, ZRAR, ILVY, OMPR, PRIA, PRIB |
| SP_PIR_KEYWORDS       | Transcription            | YKGD, CSPH, CDAR, YGIT, HYCA, ZUR, YJGJ, EVGA, NHAR, AAER, NUSB, ARCA, YPDC, NIKR, RACR, YFHA, MELR, SLMA, BASR, YFHH, ASCG, GADE, YTFA, CADC, XYLR, NRDR, CSIR, ALLS, DHAR, DPIA, RHAR, RPOS, MTLR, HDFR, RHAS, CREB, RPOZ, RCNR, RPOH, YBIH, DGOR, UIDR, RUTR, IDNR, GALR, RPON, YHAJ, TORR, PRPR, YIDZ, BAER, PCNB, ZRAR, ILVY, OMPR, RHO                                                                     |
| SP_PIR_KEYWORDS       | transcription regulation | YKGD, CSPH, CDAR, YGIT, HYCA, ZUR, PHOU, YJGJ, NHAR, EVGA, AAER, NUSB, ARCA, YPDC, NIKR, RACR, YFHA, MELR, SLMA, BASR, YFHH, ASCG, GADE, YTFA, CADC, XYLR, NRDR, CSIR, ALLS, DHAR, DPIA, RHAR, RPOS, MTLR, HDFR, RHAS, CREB, RCNR, RPOH, YBIH, DGOR, UIDR, RUTR, IDNR, GALR, RPON, YHAJ, TORR, PRPR, YIDZ, BAER, ZRAR, ILVY, OMPR, RHO                                                                           |

| Enrichment Score:     |                    |       |
|-----------------------|--------------------|-------|
| Annotation Cluster 49 | 1.8394338687546952 |       |
| Category              | Term               | Genes |

|                       |                                                                                                  |                                                                                                                                                                                                                                                                  |
|-----------------------|--------------------------------------------------------------------------------------------------|------------------------------------------------------------------------------------------------------------------------------------------------------------------------------------------------------------------------------------------------------------------|
| GOTERM_MF_FAT         | GO:0042280~cell surface antigen activity, host-interacting                                       | RFAI, RFAJ, KDSB, RFC, NANA, CLD, WAAU, LPXL, GLMU, RFAZ, RFAY, GLF, GALE, COAD, RCSF, LPXH, RFBX                                                                                                                                                                |
| GOTERM_BP_FAT         | GO:0016051~carbohydrate biosynthetic process                                                     | NANE, FTSI, BCSA, NAGE, YTJC, NANA, WAAU, FTSW, MRCB, LPXL, NANT, RFAZ, NAGB, RFAY, NAGA, PBPG, SDAB, SDAA, GALE, NANK, LPXH, RCSF, PGK, GLGB, RFAI, RFAJ, DDLB, WCAC, ALR, KDSB, CLD, RFC, WZXC, GLGP, GPSA, GLMU, MRDA, MURG, MURI, AGAW, GLF, AMIA, RFBX, EPD |
| SP_PIR_KEYWORDS       | lipopolysaccharide biosynthesis                                                                  | RFAI, RFAJ, WCAC, KDSB, RFC, CLD, WZXC, WAAU, LPXL, RFAZ, RFAY, GLF, RFBX                                                                                                                                                                                        |
| Annotation Cluster 50 | Enrichment Score: 1.703010602357233                                                              |                                                                                                                                                                                                                                                                  |
| Category              | Term                                                                                             | Genes                                                                                                                                                                                                                                                            |
| SP_PIR_KEYWORDS       | s-adenosyl-l-methionine                                                                          | YBEA, YJJW, RSMF, CYSG, PCM, HEMX, RRMJ, RUMA, METH, YBIY, MOAA, YGCF, RLMF, GIDB, HEMN                                                                                                                                                                          |
| SP_PIR_KEYWORDS       | rrna processing                                                                                  | RUMA, YBEA, RSMF, RLUC, RLUD, RLUA, RLUB, RLMF, RSUA, GIDB, RRMJ                                                                                                                                                                                                 |
| SP_PIR_KEYWORDS       | methyltransferase                                                                                | YBEA, RSMF, CYSG, RRMA, MNMA, PCM, HEMX, RRMJ, RUMA, YAFS, METH, HSDR, GCVT, RLMF, FMT, THYA, GIDB                                                                                                                                                               |
| Annotation Cluster 51 | Enrichment Score: 1.6821235167587012                                                             |                                                                                                                                                                                                                                                                  |
| Category              | Term                                                                                             | Genes                                                                                                                                                                                                                                                            |
| GOTERM_BP_FAT         | GO:0051186~cofactor metabolic process                                                            | NFUA, NAPA, MOG, BISC, METH, HEMB, MOAD, HEMC, HEMD, GOR, MOAA, HEMG, HEMH, GALE, GLTA, HEMN, SUFD, MENB, MENC, ENTF, NADC, TALB, TESB, SUFB, MENE, COAE, CYSG, PABC, GARR, GLYA, HEMX, FOLA, UBIB, GSHA, COAD, FOLE, EPD, FOLD                                  |
| GOTERM_BP_FAT         | GO:0019438~aromatic compound biosynthetic process                                                | PABC, NAPA, GLYA, WRBA, MOG, FOLA, MOAD, MOAA, TYRB, AROG, DXS, AROD, FOLE, FOLD                                                                                                                                                                                 |
| GOTERM_BP_FAT         | GO:0009396~folic acid and derivative biosynthetic process                                        | FOLA, METH, PABC, GLYA, FOLE, FOLD                                                                                                                                                                                                                               |
| GOTERM_BP_FAT         | GO:0006730~one-carbon metabolic process                                                          | YBEA, FOLA, RSMF, FOLM, GLYA, FOLE, YCBB, FOLD, RRMJ                                                                                                                                                                                                             |
| Annotation Cluster 52 | Enrichment Score: 1.6385975772330281                                                             |                                                                                                                                                                                                                                                                  |
| Category              | Term                                                                                             | Genes                                                                                                                                                                                                                                                            |
| SP_PIR_KEYWORDS       | one-carbon metabolism                                                                            | FOLA, FOLM, GLYA, FOLE, FOLD                                                                                                                                                                                                                                     |
| GOTERM_MF_FAT         | GO:0016646~oxidoreductase activity, acting on the CH-NH group of donors, NAD or NADP as acceptor | FOLA, FOLM, FOLD, PROC                                                                                                                                                                                                                                           |

|                       |                                                  |                                                                                          |
|-----------------------|--------------------------------------------------|------------------------------------------------------------------------------------------|
| Annotation Cluster 53 | Enrichment Score:<br>1.5870917155948252          |                                                                                          |
| Category              | Term                                             | Genes                                                                                    |
| KEGG_PATHWAY          | eum00633:Trinitrotoluene degradation             | HYBC, HYBO, NEMA                                                                         |
| Annotation Cluster 54 | Enrichment Score:<br>1.583393939620284           |                                                                                          |
| Category              | Term                                             | Genes                                                                                    |
| SP_PIR_KEYWORDS       | gluconeogenesis                                  | SDAB, FBAA, SDAA, PGK                                                                    |
| GOTERM_BP_FAT         | GO:0006094~gluconeogenesis                       | SDAB, SDAA, YTJC, EPD, PGK                                                               |
| Annotation Cluster 55 | Enrichment Score:<br>1.5579182173593675          |                                                                                          |
| Category              | Term                                             | Genes                                                                                    |
| SP_PIR_KEYWORDS       | cobalt                                           | USHA, YJJG, GLMU, METH, GARL, EUTB, SURE, MAP                                            |
| KEGG_PATHWAY          | eum00760:Nicotinate and nicotinamide metabolism  | USHA, YJJG, NADC, SURE                                                                   |
| Annotation Cluster 56 | Enrichment Score:<br>1.5198068260318203          |                                                                                          |
| Category              | Term                                             | Genes                                                                                    |
| SP_PIR_KEYWORDS       | cell outer membrane                              | GFCE, NANC, SFMD, NLPE, YPJA, BAMD, HTRE, LAMB, NMPC, YBGQ, BAMB, FADL, RCSF, FHUA, BTUB |
| SP_PIR_KEYWORDS       | Porin                                            | GFCE, NANC, LAMB, NMPC, BTUB                                                             |
| GOTERM_CC_FAT         | GO:0046930~pore complex                          | GFCE, NANC, LAMB, NMPC, BTUB                                                             |
| Annotation Cluster 57 | Enrichment Score:<br>1.4735709496887637          |                                                                                          |
| Category              | Term                                             | Genes                                                                                    |
| KEGG_PATHWAY          | ecj03070:Bacterial secretion system              | SECB, SECA, GSPL, GSPM, TATA, YIDC, TATE                                                 |
| SP_PIR_KEYWORDS       | protein transport                                | HOFB, SECB, SECA, HOFC, LOLA, TATA, TONB, TATE                                           |
| GOTERM_MF_FAT         | GO:0008565~protein transporter activity          | HOFC, YBHG, GSPL, YIAV, LOLA, MDTE, TATA, TONB, MACA, ACRE, TATE                         |
| GOTERM_BP_FAT         | GO:0008104~protein localization                  | HOFC, YBHG, GSPL, TATA, TONB, TATE, SECB, SECA, LOLA, YIAV, MDTE, MACA, YIDC, ACRE       |
| GOTERM_BP_FAT         | GO:0045184~establishment of protein localization | HOFC, YBHG, GSPL, TATA, TONB, TATE, SECB, SECA, LOLA, YIAV, MDTE, MACA, ACRE             |
| Annotation Cluster 58 | Enrichment Score:<br>1.4556707499032788          |                                                                                          |
| Category              | Term                                             | Genes                                                                                    |

|                       |                                            |                                                                                                                                 |
|-----------------------|--------------------------------------------|---------------------------------------------------------------------------------------------------------------------------------|
| KEGG_PATHWAY          | ecd00770:Pantothenate and CoA biosynthesis | YAGF, ACPH, COAE, COAD, ILVC                                                                                                    |
| Annotation Cluster 59 | Enrichment Score:<br>1.4455478684054628    |                                                                                                                                 |
| Category              | Term                                       | Genes                                                                                                                           |
| SP_PIR_KEYWORDS       | fmn                                        | YDDH, HEMG, PYRD, SSUD, FLDA, NEMA, MIOC, WRBA                                                                                  |
| INTERPRO              | IPR008254:Flavodoxin/nitric oxide synthase | HEMG, FLDA, MIOC, WRBA                                                                                                          |
| UP_SEQ_FEATURE        | domain:Flavodoxin-like                     | HEMG, FLDA, MIOC, WRBA                                                                                                          |
| Annotation Cluster 60 | Enrichment Score:<br>1.425424554630042     |                                                                                                                                 |
| Category              | Term                                       | Genes                                                                                                                           |
| GOTERM_BP_FAT         | GO:0008615~pyridoxine biosynthetic process | PDXY, SELA, PDXK, DXS, EPD                                                                                                      |
| GOTERM_BP_FAT         | GO:0042819~vitamin B6 biosynthetic process | PDXY, SELA, PDXK, DXS, EPD                                                                                                      |
| Annotation Cluster 61 | Enrichment Score:<br>1.4162857302152931    |                                                                                                                                 |
| Category              | Term                                       | Genes                                                                                                                           |
| KEGG_PATHWAY          | ecj00030:Pentose phosphate pathway         | TALB, PRS, FBAA, EDD, GLPX, IDNK, PFKB                                                                                          |
| KEGG_PATHWAY          | ecd00051:Fructose and mannose metabolism   | MAK, MTLD, FBAA, GLPX, PFKB, YFAU                                                                                               |
| KEGG_PATHWAY          | ecd00010:Glycolysis / Gluconeogenesis      | FBAA, YTJC, GLPX, GLK, PFKB, PGK                                                                                                |
| GOTERM_BP_FAT         | GO:0019318~hexose metabolic process        | GLGB, YJJW, PDXK, TALB, FBAA, GARR, BCSA, GALR, YTJC, GLGP, RHAM, PDXY, YBIY, RHAR, SDAB, RHAS, SDAA, GALE, EPD, GLK, PGK, PFKB |
| Annotation Cluster 62 | Enrichment Score:<br>1.411893391131368     |                                                                                                                                 |
| Category              | Term                                       | Genes                                                                                                                           |
| SP_PIR_KEYWORDS       | riboflavin biosynthesis                    | RIBD, RIBE, RIBA                                                                                                                |
| Annotation Cluster 63 | Enrichment Score:<br>1.373730065057539     |                                                                                                                                 |
| Category              | Term                                       | Genes                                                                                                                           |
| SP_PIR_KEYWORDS       | transcription initiation                   | RPOH, RPOS, RPON                                                                                                                |
| GOTERM_BP_FAT         | GO:0032774~RNA biosynthetic process        | RPOH, DNAC, RPOS, NUSB, RPON, PRIA, PRIB, RPOZ, RHO                                                                             |
| GOTERM_BP_FAT         | GO:0006351~transcription, DNA-dependent    | RPOH, RPOS, NUSB, RPON, RPOZ, RHO                                                                                               |

---

SP\_PIR\_KEYWORDS

Sigma factor

RPOH, RPOS, RPON
